# Supplementary material for: Dr Foster global frailty score: an international retrospective observational study developing and validating a risk prediction model for hospitalised older persons from administrative data sets
Source: PubMed Central journal article supplement — BMJ Open. 2019 Jun 22;9(6):e026759. doi: 10.1136/bmjopen-2018-026759 (PMC6596946; doi:10.1136/bmjopen-2018-026759), 2019-06-22
Supplement: bmjopen-2018-026759.draft_revisions.pdf [file bmjopen-2018-026759.draft_revisions.pdf]

# BMJ Open

BMJ Open is committed to open peer review. As part of this commitment we make the peer review history of every article we publish publicly available.

When an article is published we post the peer reviewers' comments and the authors' responses online. We also post the versions of the paper that were used during peer review. These are the versions that the peer review comments apply to.

The versions of the paper that follow are the versions that were submitted during the peer review process. They are not the versions of record or the final published versions. They should not be cited or distributed as the published version of this manuscript.

BMJ Open is an open access journal and the full, final, typeset and author-corrected version of record of the manuscript is available on our site with no access controls, subscription charges or pay-per-view fees (<http://bmjopen.bmj.com>).

If you have any questions on BMJ Open's open peer review process please email [info.bmjopen@bmj.com](mailto:info.bmjopen@bmj.com)

# BMJ Open

## The Dr Foster Global Frailty Score: an international risk prediction model for hospitalised older persons derived from administrative datasets

|                               |                                                                                                                                                                                                                                                                                                                                                                                                                                                                                                                                                                                                                                                                                                                                                                                           |
|-------------------------------|-------------------------------------------------------------------------------------------------------------------------------------------------------------------------------------------------------------------------------------------------------------------------------------------------------------------------------------------------------------------------------------------------------------------------------------------------------------------------------------------------------------------------------------------------------------------------------------------------------------------------------------------------------------------------------------------------------------------------------------------------------------------------------------------|
| Journal:                      | <i>BMJ Open</i>                                                                                                                                                                                                                                                                                                                                                                                                                                                                                                                                                                                                                                                                                                                                                                           |
| Manuscript ID                 | bmjopen-2018-026759                                                                                                                                                                                                                                                                                                                                                                                                                                                                                                                                                                                                                                                                                                                                                                       |
| Article Type:                 | Research                                                                                                                                                                                                                                                                                                                                                                                                                                                                                                                                                                                                                                                                                                                                                                                  |
| Date Submitted by the Author: | 28-Sep-2018                                                                                                                                                                                                                                                                                                                                                                                                                                                                                                                                                                                                                                                                                                                                                                               |
| Complete List of Authors:     | Soong, John; National University Hospital, Medicine; Imperial College London Department of Primary Care and Public Health, Medicine<br>Kaubryte, Jurgita; Dr Foster Ltd<br>Liew, Danny; Monash University, Epidemiology and Preventive Medicine at The Alfred Centre;<br>Peden, Carol; University of Southern California, Keck School of Medicine<br>Bottle, Alex; Imperial College, Primary Care and Social Medicine<br>Bell, Derek; The National Institute for Health Research (NIHR) Collaboration for Leadership in Applied Health Research and Care (CLAHRC) Northwest London; Imperial College London Department of Primary Care and Public Health<br>Cooper, Carolyn; Guy's and Saint Thomas' NHS Foundation Trust<br>Hopper, Adrian; Guy's and Saint Thomas' NHS Foundation Trust |
| Keywords:                     | Frailty, Secondary Care, Measure, Administrative, Risk Prediction                                                                                                                                                                                                                                                                                                                                                                                                                                                                                                                                                                                                                                                                                                                         |
|                               |                                                                                                                                                                                                                                                                                                                                                                                                                                                                                                                                                                                                                                                                                                                                                                                           |

SCHOLARONE™  
Manuscripts

1  
2  
3 Dear Editor

4  
5 We are pleased to submit this observational study developing and validating an international  
6 score for the measurement of frailty that was derived from routinely collected administrative  
7 data  
8

9  
10 This is the first frailty score derived from an international dataset from 34 hospitals from nine  
11 countries across Europe, Australia, the UK and USA, and has validation in large English  
12 national administrative data for important outcomes: in-hospital mortality, 30 day non-  
13 elective readmission and long length of hospital stay.  
14  
15

16 Important implications of this research include international case-mix adjustment and clinical  
17 risk stratification of older persons at population level  
18

19  
20 This is a follow up study from previous work we have published at the BMJ Open:  
21

- 22 1. Soong J, Poots A, Scott S, Donald K, Bell D. Developing and validating a risk  
23 prediction model for acute care based on frailty syndromes. BMJ Open.  
24 2015;5(10):e008457.  
25 2. Soong J, Poots AJ, Scott S, Donald K, Woodcock T, Lovett D, et al. Quantifying the  
26 prevalence of frailty in English hospitals. BMJ Open. 2015;5(10):e008456.  
27  
28

29 We thank you for your kind consideration  
30

31 Dr John Tshon Yit Soong  
32  
33  
34  
35  
36  
37  
38  
39  
40  
41  
42  
43  
44  
45  
46  
47  
48  
49  
50  
51  
52  
53  
54  
55  
56  
57  
58  
59  
60

1  
2  
3 Title: The Dr Foster Global Frailty Score: an international risk prediction model for  
4 hospitalised older persons derived from administrative datasets  
5

6 John Tshon Yit Soong<sup>1</sup>, Jurgita Kaubryte<sup>2</sup>, Danny Liew<sup>3</sup>, Carol J. Peden<sup>4</sup>, Alex Bottle<sup>5</sup>, Derek  
7 Bell<sup>6</sup> Carolyn Cooper<sup>7</sup>, Adrian Hopper<sup>7</sup>  
8  
9

10 Corresponding author: John Tshon Yit Soong

11 Address: NUHS Tower Block, 10<sup>th</sup> Floor, Advanced Internal Medicine, 1E Kent Ridge Road,  
12 119228, Singapore  
13

14 Email: [John\\_Soong@nuhs.edu.sg](mailto:John_Soong@nuhs.edu.sg)

15 Telephone number: +6597328267  
16  
17

18  
19 Word Count: 3182  
20

21 Keywords: Frailty, Secondary Care, Measure, Administrative, Risk prediction  
22

23 Authors Affiliations  
24

25 1. National University Hospital, Singapore  
26

27 2. Dr Foster Ltd, London, United Kingdom  
28

29 3. School of Public Health and Preventive Medicine, Monash University, Melbourne,  
30 Australia  
31

32 4. Keck School of Medicine, University of Southern California, Los Angeles, USA.  
33  
34

35 5. School of Public Health, Faculty of Medicine, Imperial College London  
36

37 6. The National Institute for Health Research (NIHR) Collaboration for Leadership in Applied  
38 Health Research and Care (CLAHRC) Northwest London  
39

40 7. Guy's and St Thomas' NHS Foundation Trust  
41  
42  
43  
44  
45  
46  
47  
48  
49  
50  
51  
52  
53  
54  
55  
56  
57  
58  
59  
60

1  
2  
3 Structured abstract 300 words. (300 words)  
4

5 Objectives. This study aimed to examine the prevalence of frailty coding within the Dr Foster  
6 Global Comparators (GC) international database. We then aimed to develop and validate a  
7 risk prediction model, based on frailty syndromes, for key outcomes using the GC dataset.  
8  
9

10 Design. A retrospective cohort analysis of data from patients over 75 years of age from the  
11 GC international administrative data. A risk prediction model was developed from the initial  
12 analysis based on seven frailty syndrome groups and their relationship to outcome metrics.  
13 A weighting was then created for each syndrome group and summated to create the Dr  
14 Foster Global Frailty Score. Performance of the score for predictive capacity was compared  
15 with an established prognostic comorbidity model (Elixhauser) and tested on another  
16 administrative database Hospital Episode Statistics (2011-2015), for external validation.  
17  
18  
19  
20  
21  
22

23 Setting. 34 hospitals from nine countries across Europe, Australia, the UK and USA.  
24

25 Results. Of 6.7 million patient records in the GC database, 1.4 M (20%) were from patients  
26 aged 75 years or more. There was marked variation in coding of frailty syndromes between  
27 countries and hospitals. Frailty syndromes were coded in 2-24% of patient spells. Falls and  
28 fractures was the most common syndrome coded (24%). The Dr Foster Global Frailty Score  
29 was significantly associated with in-hospital mortality, 30-day non-elective readmission and  
30 long length of hospital stay. The score had significant predictive capacity beyond that of  
31 other known predictors of poor outcome in older persons, such as co-morbidity and  
32 chronological age. The score's predictive capacity was higher in the elective group  
33 compared with non-elective, and may reflect improved performance in lower acuity states.  
34  
35  
36  
37  
38  
39

40 Conclusions: Frailty Syndromes can be coded in international secondary care administrative  
41 datasets. The Dr Foster Global Frailty Score significantly predicts key outcomes. This  
42 methodology may be feasibly utilised for case-mix adjustment for older persons  
43 internationally.  
44  
45  
46  
47  
48  
49  
50  
51  
52  
53  
54  
55  
56  
57  
58  
59  
60

1  
2  
3 Article summary – strengths and limitations of this study  
4

- 5 • This study is a large multicentre international study across Europe, Australia and the  
6 United States utilising a routinely collected administrative data with the aim of  
7 providing a simple model for case-mix adjustment for older persons in secondary  
8 care.  
9
- 10 • The dataset used represent whole populations, and there was little missing data.  
11
- 12 • Robust statistical methods were used and the Dr Foster Global Frailty Score was  
13 validated on an external dataset (Hospital Episode Statistics)  
14
- 15 • Our model's predictive capacity is comparable with other recent single country  
16 studies  
17
- 18 • The variability in frequency of coding of frailty syndromes across countries may limit  
19 reliability and generalisability.  
20  
21  
22  
23  
24  
25  
26  
27  
28  
29  
30  
31  
32  
33  
34  
35  
36  
37  
38  
39  
40  
41  
42  
43  
44  
45  
46  
47  
48  
49  
50  
51  
52  
53  
54  
55  
56  
57  
58  
59  
60

## Introduction

Increased population ageing stems from a range of diverse factors, including lower childhood and adult mortality, improved fertility, migration, relative world peace and improved health and social care(1). For many, this phenomenon is associated with good health and quality of life(2). For others, there is increased co-morbidity(3), functional decline(4) and poorer quality of life. Differences in the health and function of individuals as they grow older is not readily explained by chronological age(5). Frailty is common and increasingly prevalent with advancing age and often defined as a decrease in physiological reserve over a life-course. Using this pathophysiological model of frailty several underlying processes have been described, including chronic inflammation(6, 7), sarcopaenia(8), anaemia(9) and coagulopathy, steroid hormone dysregulation(10, 11), low vitamin D levels, malnutrition(12, 13) and insulin resistance(14, 15) underpin frailty. These deficits can accumulate over the course of life-time exposure to environmental stressors. Frailty manifests as a combination of the pathophysiological consequence of inbuilt senescence and the accumulation of defects throughout a life-course. Frailty ultimately results in recognisable clinical manifestations such as recurrent falls and delirium and is associated with increased mortality, disability and high resource utilisation(16). Conceptually and operationally, frailty appears to be related to, but distinct from, disability, co-morbidity and chronological age(17). The importance of contributing environmental factors and the psycho-social impact of frailty are increasingly being recognised(18) as important.

Assessing frailty in the hospital setting is challenging. Many frailty assessment scores tested have poor reliability, require large amounts of data, or specialised equipment and have poor predictive performance(19). Given these limitations, there is increasing interest in utilising routinely collected administrative data for risk prediction modelling for those at risk of frailty, particularly older persons. Risk prediction models estimate the likelihood of developing a specific outcome, or having a specific condition. These models can be utilised for the purposes of case-mix adjustment or risk-stratification. Case-mix risk adjustment allows for more accurate comparison of organisational performance by reducing confounding bias. For example, when considering mortality as an outcome measure for organisations, patient-specific factors such as illness severity influence outcome, and must be taken into account. Risk stratification allows for possible segmentation of a population into different levels of risk for developing a specific outcome. This segmentation can then be used to health system planning or inform targeting of resources.

1  
2  
3 In older persons, risk prediction models often utilise chronological age(20), co-morbidity(21)  
4 and functional dependence(22) as patient-specific factors for risk prediction. In the context of  
5 long-term care (e.g. nursing homes), risk prediction models often utilise functional  
6 dependence as a patient factor, to aid appropriate health resource utilisation and costing  
7 (23-25). A recent English study in the primary care setting derived an electronic frailty index  
8 from patient records with predictive validity for nursing home admission, hospitalisation and  
9 mortality (26). In secondary care, risk prediction models for older persons have utilised  
10 measures of demographics, and co-morbidity in the form of diagnostic (27-30) and  
11 procedural codes(31, 32), as well as prescription data(29, 33). Frailty syndromes are  
12 recognised as clinical manifestations of frailty(34). These common presentations in older  
13 persons include recurrent falls, cognitive impairment, incontinence and pressure ulcers, are  
14 associated with poor outcome. Recent studies have explored the coding of frailty syndromes  
15 within secondary care administrative datasets in the United Kingdom, and its association  
16 with in-hospital mortality, non-elective readmission and functional decline.(35, 36)  
17  
18  
19  
20  
21  
22  
23  
24

25 In this study, we explored the prevalence of coded frailty syndromes within an international  
26 secondary care dataset to develop and validate a risk prediction model based on frailty  
27 syndromes for the outcomes of mortality, non-elective readmission and long length of stay.  
28 We sought to compare the performance of this model with an established prognostic co-  
29 morbidity model for the above outcomes.  
30  
31  
32  
33  
34

## 35 **Methods**

### 36 **Data Sources**

37  
38 The Global Comparators programme at Dr Foster® was an international hospital  
39 collaborative which ran from 2011-2017, focused on pooling and benchmarking data,  
40 knowledge-sharing networks and health services research to better understand variations in  
41 outcomes and disseminate international best practice. The hospitals within the collaboration  
42 contributed administrative data to be pooled within the Global Comparators dataset, using  
43 established data cleaning processes(37). This provided a rich patient-level dataset  
44 containing demographics, diagnostic codes, procedure codes and outcomes, collected  
45 primarily for administrative purposes, such as operational needs and costing. To develop  
46 and test Dr Foster Global Frailty Score, Global Comparators data were extracted from 34  
47 hospitals in nine countries: Australia, Belgium, Denmark, Finland, Italy, Netherlands,  
48 Norway, United Kingdom and United States.  
49  
50  
51  
52  
53  
54  
55  
56  
57  
58  
59  
60



1  
2  
3 Hospital Episode Statistics (HES) is an English national administrative dataset, housed  
4 within the safe haven of NHS Digital, and contains administrative data from English hospital  
5 trusts, which are cleaned and securely stored. This dataset was used to validate the Dr  
6 Foster Global Frailty Score. We included the 138 English acute non-specialist hospital trusts,  
7 excluding hyper-specialist hospitals (e.g. single pathology quaternary referral units) and  
8 mental health units, which have different case-mix.  
9  
10  
11

### 12 13 Study Population

14 Patient records were included in the analysis if they fulfilled the criteria of patient age  $\geq 75$   
15 years and required an elective or non-elective hospital admission of 24 hours or more.  
16 Patient spells were excluded if the age, sex or length of stay was recorded as missing or  
17 invalid, or the admission was planned and the patient discharged home on the same day, or  
18 the admission was unplanned but no procedure was undertaken and the patient went home  
19 after recorded length of stay less than 2 days. This was to exclude records with inadequate  
20 quality data, and patients admitted into observations units or day-case attendances. Overall,  
21 0.17% of data were missing within the derivation dataset.  
22  
23  
24  
25  
26  
27

### 28 Coding frailty

29 Each patient record corresponded to a spell covering a patient's total length of stay at a  
30 hospital. Within HES, these were aggregated into 'superspells' (admissions), which  
31 encompass the full length of stay for the patient across all hospital trusts before their final  
32 discharge. Seven groups of frailty syndromes were chosen to represent the common  
33 domains used in comprehensive geriatric assessment: Dementia and Delirium, Mobility  
34 Problems, Falls and Fractures, Pressure Ulcers and Weight Loss, Incontinence,  
35 Dependence and Care, as well as Anxiety and Depression were coded within International  
36 Statistical Classification of Diseases, Injuries and Causes of Death (ICD) diagnostic coding  
37 groups, and within all available diagnostic fields. As the Global Comparators dataset  
38 comprised hospitals which utilised different revisions of ICD (revision 9 and 10), equivalent  
39 diagnostic codes for both versions were compiled. These diagnostic coding groups were  
40 modified from previously published work on English national administrative data(35).  
41 Appendix 1 displays the full list of ICD-9 and ICD-10 diagnostic codes utilised to code for the  
42 seven frailty syndrome groups. Trends by calendar year and month, country and frailty  
43 syndrome group were plotted to investigate frequency of coding for the years 2010-2014.  
44 Based on this analysis, years 2012-2013 were selected as having stable coding for  
45 multivariable risk prediction modelling within the derivation dataset.  
46  
47  
48  
49  
50  
51  
52  
53  
54  
55  
56  
57  
58  
59  
60

Table 1: Predictors inputs for frailty risk prediction model (independent predictors)

| Name                          | Time span                            | Description                                                                                                              | Comments                                                                                                                                    |
|-------------------------------|--------------------------------------|--------------------------------------------------------------------------------------------------------------------------|---------------------------------------------------------------------------------------------------------------------------------------------|
| Age                           | Current spell                        | Age on admission                                                                                                         |                                                                                                                                             |
| Gender                        | Current spell                        | Gender on admission                                                                                                      |                                                                                                                                             |
| Country                       | Current Spell                        | Country from which hospital contributed data                                                                             | Nominal; Countries were:<br>Australia<br>Belgium<br>Denmark<br>Finland<br>Italy<br>Netherlands<br>Norway<br>United Kingdom<br>United States |
| Dementia & Delirium           | 12-month historical binary indicator | A binary flag indicating whether a relevant diagnosis has been received during any inpatient spell in the past 12 months | Final Dr Foster Global Frailty Score is weighted (see risk stratification models section for further details)                               |
| Mobility Problems             |                                      |                                                                                                                          |                                                                                                                                             |
| Falls & Fractures             |                                      |                                                                                                                          |                                                                                                                                             |
| Pressure Ulcers & Weight Loss |                                      |                                                                                                                          |                                                                                                                                             |
| Dependence and Care           |                                      |                                                                                                                          |                                                                                                                                             |
| Anxiety & Depression          |                                      |                                                                                                                          |                                                                                                                                             |
| Co-morbidity (Elixhauser)     | 12-month historical score            | A weighted score (see risk stratification                                                                                | Integer                                                                                                                                     |

1  
2  
3  
4  
5  
6  
7  
8  
9  
10  
11  
12  
13  
14  
15  
16  
17  
18  
19  
20  
21  
22  
23  
24  
25  
26  
27  
28  
29  
30  
31  
32  
33  
34  
35  
36  
37  
38  
39  
40  
41  
42  
43  
44  
45  
46  
47

|                               |                           |                                                                                                 |         |
|-------------------------------|---------------------------|-------------------------------------------------------------------------------------------------|---------|
|                               |                           | models section for further details)                                                             |         |
| Number of previous admissions | 12-month historical count | The number of emergency admission spells in the previous 12 months, excluding the current spell | Integer |

Table 2: Predictor outputs for frailty risk prediction model (dependent variables)

| Name                            | Time span              | Description                                                                                                                                       | Comments                                                  |
|---------------------------------|------------------------|---------------------------------------------------------------------------------------------------------------------------------------------------|-----------------------------------------------------------|
| In-hospital mortality           | Current spell          | Indicates if the discharge method was death                                                                                                       |                                                           |
| 30-day non-elective readmission | 30 days from discharge | Indicates if the patient had an emergency admission with admission date between 1 and 30 days following the discharge date of the index admission | Spells that ended in death are excluded from the analysis |
| Long length of stay             | Current spell          | Upper quartile length of hospital stay for country                                                                                                |                                                           |

## Risk Models

Within the Global Comparators dataset, 30 models were created. The characteristics of predictor and outcome variables included within the models are described in Tables 1 and 2. Elective and non-elective hospital admission populations were modelled separately. A two-step process for each outcome was utilised to model the frailty and comorbidity scores. First, binary logistic regression was utilised to ascertain odds ratios (ORs) for each frailty syndrome group and each outcome, within the population subgroups separately (elective and non-elective). The natural log of OR ( $\ln$  OR) was used to create weights for each frailty syndrome group, using the smallest  $\ln$  OR as reference (weighted 1.0). Secondly, the summation of the weights for each frailty syndrome group was utilised to create a frailty score. The patient-level frailty score was then included within a multivariable logistic regression model, adjusted for age, gender and country, for each outcome. Figure 1 illustrates an example of this two-step process for the outcome of upper quartile length of stay.

The Elixhauser co-morbidity score was calculated for each outcome using previously described methods(38). To provide comparison, the Elixhauser co-morbidity score was then included within a multivariable logistic regression model, adjusting for age, gender and country, for each outcome. Finally, both the Elixhauser co-morbidity and Dr Foster Global Frailty Score were then included within a multivariable logistic regression model, adjusted for age, gender and country, for each outcome. The predicted probabilities from these regression models were utilised to calculate Area under the Receiver Operator Characteristic Curves (AUC) as a measure of predictive capacity for each outcome. This two-step process was repeated for the Dr Foster Global Frailty Score on HES years 2011-2015 for external validation.

## Performance metrics

Multicollinearity between predictor variables was investigated by variance inflation factor (VIF), where VIF scores of over three were taken to denote unacceptable collinearity. The Hosmer-Lemeshow statistic was calculated for each model to ascertain model calibration. The Wald statistic was calculated to explore the explanatory power of the Dr Foster Global Frailty Score, Elixhauser co-morbidity Score, age, country and gender for each of the three outcomes. Statistical analysis was undertaken using the R Statistical Package.

## Results

### Descriptive statistics

Of the 6,739,790 spells within the Global Comparators Database from 2010-2014, 1,366,187 (20%) involved patients aged  $\geq 75$  years. There was variation in frequency of coding of frailty syndromes across the countries. The four countries with most volume of coded frailty syndromes were Australia, Belgium, the United Kingdom and the United States. Figure 2a & 2b describes the percentage of spells of patients  $\geq 75$  years to total volume by country and year within the database, and the frequency of coding for frailty syndromes by country for the year 2013.

### Coded Frailty Syndromes

Frailty syndromes were coded in 2-24% of patient spells among patients aged  $\geq 75$  years from 2010-2014 within the Global Comparators database: Falls and Fractures N=326,528 (24%); Dementia and Delirium N=215,629 (16%); Anxiety and Depression N=87,732 (6%); Pressure Ulcers and Weight Loss N=66,208 (5%); Incontinence N=50,277 (4%); Mobility Problems N=39,479 (3%); and Dependence and Care N=28,294 (2%). At least one frailty syndrome was present in 538,766 (39%) of spells.

### Derivation Cohort

Of the 294,998 patient spells from 2012-2013 for those aged  $\geq 75$  years used in the predictive models within the derivation cohort from the Global Comparators Dataset, 221 441 (75%) were non-elective admissions and 158 595 were female (54%). Patient spells that ended with inpatient mortality (42,354, 14%) of were excluded from the predictive models exploring non-elective readmission.

### Dr Foster Global Frailty Score

Negative scores were set to 0 and positive scores were not capped. The Dr Foster Global Frailty Score varied based on outcome and population (elective and non-elective), and remained significant after multivariable adjustment. Table 3 summarises the ORs of the Dr Foster Global Frailty Score and Elixhauser Co-morbidity Score after multivariable adjustment for age, gender and country for the outcomes of in-hospital mortality, 30-day non-elective readmission and upper quartile length of stay (for country), by elective and non-elective population groups. Appendix 2 displays full multivariable adjustment of the Dr Foster Global Frailty Score.

Table 3: Odds ratios for Elixhauser and Dr Foster Global Frailty Score after multivariable adjustment for age, gender and country

|                                | Outcome                                     | Score range | Population   | Odds Ratio | Lower CI | Upper CI | P-value |
|--------------------------------|---------------------------------------------|-------------|--------------|------------|----------|----------|---------|
| Dr Foster Global Frailty Score | In-hospital mortality                       | 0-11        | Elective     | 1.277      | 1.247    | 1.308    | <0.001  |
|                                |                                             | 0-13        | Non-elective | 1.109      | 1.103    | 1.116    | <0.001  |
|                                | 30-day non-elective readmission             | 0-6         | Elective     | 1.106      | 1.060    | 1.154    | <0.001  |
|                                |                                             | 0-4         | Non-elective | 1.056      | 1.031    | 1.082    | <0.001  |
|                                | Upper Quartile Length of Stay (for country) | 0-16        | Elective     | 1.365      | 1.347    | 1.382    | <0.001  |
|                                |                                             | 0-17        | Non-elective | 1.199      | 1.194    | 1.205    | <0.001  |

|                               |                                             |  |              |       |       |       |        |
|-------------------------------|---------------------------------------------|--|--------------|-------|-------|-------|--------|
| Elixhauser co-morbidity score | In-hospital mortality                       |  | Elective     | 1.309 | 1.290 | 1.329 | <0.001 |
|                               |                                             |  | Non-elective | 1.130 | 1.126 | 1.133 | <0.001 |
|                               | 30-day non-elective readmission             |  | Elective     | 1.144 | 1.130 | 1.158 | <0.001 |
|                               |                                             |  | Non-elective | 1.045 | 1.042 | 1.048 | <0.001 |
|                               | Upper quartile length of stay (for country) |  | Elective     | 1.101 | 1.097 | 1.105 | <0.001 |
|                               |                                             |  | Non-elective | 1.069 | 1.068 | 1.071 | <0.001 |

When both the Dr Foster Global Frailty Score and Elixhauser co-morbidity Score were included in multivariable risk adjustment models for age, gender and country, the Dr Foster Global Frailty Score remained significant for the outcomes of in-hospital mortality and upper quartile length of stay, but not for 30-day non-elective readmission (Table 4).

Table 4: Odds ratios for Elixhauser and Dr Foster Global Frailty Score after multivariable adjustment for age, gender and country with both scores in model

| Outcome                         | Population   | Score              | Odds Ratio | Lower CI | Upper CI | P-value |
|---------------------------------|--------------|--------------------|------------|----------|----------|---------|
| In-hospital mortality           | Elective     | Elixhauser         | 1.283      | 1.263    | 1.304    | <0.001  |
|                                 |              | Frailty            | 1.114      | 1.085    | 1.144    | <0.001  |
|                                 | Non-elective | Elixhauser         | 1.123      | 1.119    | 1.126    | <0.001  |
|                                 |              | Frailty            | 1.058      | 1.052    | 1.065    | <0.001  |
| 30-day non-elective readmission | Elective     | Admission History* | 1.273      | 1.234    | 1.314    | <0.001  |
|                                 |              | Elixhauser         | 1.142      | 1.128    | 1.157    | <0.001  |
|                                 |              | Frailty            | 1.032      | 0.988    | 1.077    | 0.160   |
|                                 | Non-elective | Admission History* | 1.240      | 1.228    | 1.252    | <0.001  |
|                                 |              | Elixhauser         | 1.045      | 1.042    | 1.048    | <0.001  |
|                                 |              | Frailty            | 1.024      | 1.000    | 1.049    | 0.052   |
| Upper quartile length of stay   | Elective     | Elixhauser         | 1.081      | 1.077    | 1.085    | <0.001  |
|                                 |              | Frailty            | 1.243      | 1.227    | 1.260    | <0.001  |
|                                 | Non-elective | Elixhauser         | 1.055      | 1.053    | 1.056    | <0.001  |
|                                 |              | Frailty            | 1.137      | 1.131    | 1.142    | <0.001  |

\*Admission history included in multivariable model exploring 30-day non-elective readmission

The predictive capacity of the Dr Foster Global Frailty Score and Elixhauser co-morbidity score are compared in Table 5. When the Dr Foster Global Frailty Score and Elixhauser co-morbidity score are both included in a multivariable model adjusted for age, gender and country, the predictive capacity is moderate to good. The predictive capacity of the Elixhauser co-morbidity score generally exceeds that of the Dr Foster Global Frailty Score for all three outcomes.

Table 5: Area under the Receiver Operator Statistic Curve for outcomes by Elixhauser score, Dr Foster Global Frailty Score and population within Global Comparators dataset

| Global Comparators Dataset       | Elixhauser |              | Dr Foster Global Frailty Score |              | Elixhauser and Dr Foster Global Frailty Score |              |
|----------------------------------|------------|--------------|--------------------------------|--------------|-----------------------------------------------|--------------|
|                                  | Elective   | Non-elective | Elective                       | Non-elective | Elective                                      | Non-elective |
| In-hospital mortality            | 0.80       | 0.69         | 0.70                           | 0.62         | 0.81                                          | 0.69         |
| 30-day non-elective readmission* | 0.67       | 0.64         | 0.64                           | 0.63         | 0.67                                          | 0.64         |
| Upper quartile length of stay    | 0.72       | 0.63         | 0.69                           | 0.61         | 0.73                                          | 0.65         |

\*Admission history included in multivariable model exploring 30-day non-elective readmission

The Wald statistic for independent variables included in final models by population and outcome are displayed in Table 6. Overall, the explanatory power of the Elixhauser co-morbidity score exceeds the Dr Foster Global Frailty Score for all three outcomes.

Table 6: Wald Statistic for independent variables of final models by outcome and population

|                                | Upper quartile length of stay |              | 30-day non-elective readmission |              | In-hospital mortality |              |
|--------------------------------|-------------------------------|--------------|---------------------------------|--------------|-----------------------|--------------|
|                                | Elective                      | Non-elective | Elective                        | Non-elective | Elective              | Non-elective |
| Age                            | 31.1                          | 31.4         | 0.0                             | 0.4          | 46.4                  | 747.2        |
| Sex                            | 18.7                          | 0.2          | 6.9                             | 77.6         | 9.5                   | 85.2         |
| Country                        | 162.0                         | 244.2        | 31.1                            | 102.1        | 12.8                  | 137.8        |
| Admission History              | -                             | -            | 225.9                           | 1888.4       | -                     | -            |
| Dr Foster Global Frailty Score | 1020.7                        | 2579.9       | 2.0                             | 3.8          | 62.7                  | 318.2        |
| Elixhauser Score               | 1727.5                        | 4075.1       | 420.4                           | 848.4        | 973.9                 | 4842.1       |



### Performance metrics

All our models displayed significance at  $p < 0.05$  for the Hosmer-Lemeshow tests for goodness-of-fit test. These findings have been similarly described by others who have produced models on large data sets as the test is recognised to detect unimportant differences(38, 39). None of the predictor variables demonstrated unacceptable collinearity(40).

### Validation Cohort

Of the 7,195,950 patient spells from 2011-2015 used in the predictive models within the validation cohort from English national Hospital Episode Statistics data, 6,128,811 (85%) were non-elective admissions, and 564,182 (7.8%) patient spells ending with in-hospital mortality were excluded from predictive models exploring non-elective readmission.

The Dr Foster Global Frailty Score remained significant after multivariable adjustment within the validation dataset. However, the predictive capacity and ORs were generally lower across all three outcomes compared to the derivation cohort. Table 7 summarises the ORs and AUC of the Dr Foster Global Frailty Score after multivariable adjustment for age, gender and calendar year for the outcomes of in-hospital mortality, 30-day non-elective readmission and upper quartile length of stay (for country), by elective and non-elective population groups. Appendix 3 displays full multivariable adjustment of the Dr Foster Global Frailty Score within the validation dataset.

Table 7: Odds ratios and for Area under the Receiver Operator Statistic Curve (AUC) for Global Frailty Score following multivariable adjustment for age, gender, calendar year by population subgroup and outcome

| Outcome                                     | Population   | AUC   | Odds Ratio | Lower CI | Upper CI | P-value |
|---------------------------------------------|--------------|-------|------------|----------|----------|---------|
| In-hospital mortality                       | Elective     | 0.649 | 1.173      | 1.171    | 1.174    | <0.001  |
|                                             | Non-elective | 0.655 | 1.108      | 1.107    | 1.109    | <0.001  |
| 30-day non-elective readmission             | Elective     | 0.630 | 1.045      | 1.044    | 1.047    | <0.001  |
|                                             | Non-elective | 0.630 | 1.030      | 1.030    | 1.031    | <0.001  |
| Upper Quartile Length of Stay (for country) | Elective     | 0.676 | 1.193      | 1.192    | 1.193    | <0.001  |
|                                             | Non-elective | 0.677 | 1.055      | 1.055    | 1.055    | <0.001  |

\*Admission history included in multivariable model exploring 30-day non-elective readmission

## Discussion

Our study found that frailty syndromes are feasibly coded within a large (N≈1.3m) international dataset of hospitalised older persons (aged over 75 years) utilising readily available administrative data. This is consistent with a previous study using English administrative data(36). The Dr Foster Global Frailty Score was derived from these coded syndromes within this dataset, and further validated on an English national secondary care dataset (N≈7.2m). The score was significantly associated with in-hospital mortality, 30-day non-elective readmission and long length of hospital stay. The Dr Foster Global Frailty Score has significant predictive capacity beyond that of other known predictors of poor outcome in older persons, such as co-morbidity and chronological age. The score's predictive capacity was generally higher in the elective group compared with the non-elective, and may reflect improved performance in lower acuity states.

The ORs and predictive capacity in the validation cohort were generally lower than the derivation cohort, but are in keeping with other risk prediction models for older persons within the English secondary care administrative data(35, 41). There was marked variation in

1  
2  
3 volume and frequency of coding for frailty syndromes across participating countries (Figure  
4 2). These differences may reflect different coding practices and contrasting healthcare  
5 systems. These differences may contribute to poorer performance within the validation  
6 cohort. Nevertheless, within pooled data across all participating sites, the Dr Foster Global  
7 Frailty Score appears to significantly predict in-hospital mortality and upper quartile length of  
8 stay (for country) after multivariable adjustment for age, gender, country and co-morbidity.  
9

10  
11  
12  
13 When both the Elixhauser co-morbidity score and Dr Foster Global Frailty Score were  
14 included within multivariable adjustment, both scores remain statistically significant for the  
15 outcomes of in-hospital mortality and upper quartile length of stay, suggesting they are not  
16 collinear.  
17  
18

19  
20  
21 Although the setting for the validation cohort was sourced only from English data, it was a  
22 large dataset (N=~7m spells). After multivariable adjustment for age, gender and year, the  
23 Dr Foster Global Frailty Score remained significant for all three outcomes. Predictive power  
24 was demonstrated to be similar to a previous study(35), and comparable to the derivation  
25 cohort (Table 5).  
26  
27

28  
29  
30 In clinical practice, risk stratification in older persons for the secondary care setting often  
31 utilise demographics (including chronological age), physiological based track-and-trigger  
32 systems (e.g. National Early Warning Score(42)), biomarkers (e.g. troponin) and  
33 understanding about the prognosis of specific disease states(e.g. co-morbidity). When  
34 adjusting for case-mix between systems or at organisational level, registry(43) or  
35 administrative(28) data are often employed, as large scale high quality data from patient  
36 records are not readily available. Consequently, risk prediction models using administrative  
37 data have sought to differentiate risk by using diagnostic(27-30), procedural(31, 32) and  
38 more recently, prescribing codes(29, 33).  
39  
40  
41  
42  
43

44  
45 There are several risk models in the United States utilising frailty-specific groups of  
46 diagnostic codes within Medicare administrative data, Medicare Current Beneficiary Survey  
47 (MCBS) data and Veteran's Affairs (VA) administrative data. Examples of these risk  
48 prediction models include Johns Hopkins Adjusted Clinical Groups (ACG, Johns Hopkins  
49 University) frailty-defining diagnoses indicator(28) and High-Risk Diagnosis for the Elderly  
50 Scale(30). In the UK, studies exploring case-mix adjustment for older persons using  
51 administrative data have utilised HES as a data source, with diagnostic groups for  
52 multimorbidity(38) and complexity(44), as well as frailty(35, 41) being tested in the literature.  
53  
54  
55  
56 Appendix 4 summarises the characteristics, setting, data sources, predictor and outcome  
57  
58  
59

1  
2  
3 variables and performance of recent case-mix studies for older persons utilising  
4 administrative data. Where predictive capacity is known, the Dr Foster Global Frailty Score  
5 performs comparably if not favourably.  
6  
7

8  
9 Our study benefits from being a large multicentre international study across Europe,  
10 Australia and the United States that utilised routinely collected administrative data with the  
11 aim of case-mix adjustment for older persons in secondary care. The datasets represent  
12 whole populations, and there was little missing data. Our study employed robust statistical  
13 methods and included validation of the Dr Foster Global Frailty Score on an external dataset.  
14 It expands the diagnostic coding, provides external validation for a previous UK study(35)  
15 and extends it to include elective patients. Additionally, our model's predictive capacity is not  
16 improved on by a recent UK study(41), and its predictive capacity is arguably more uniform  
17 across the three outcomes.  
18  
19  
20  
21  
22

23 However, some limitations warrant mention. The variability in frequency of coding of frailty  
24 syndromes across countries may limit reliability and generalisability, although the country of  
25 origin was accounted for in the multivariable regression. Further subgroup analysis in  
26 countries with similar frequency of coding, or hierarchical regression to account for clusters,  
27 may be the next step. The accuracy of coding in administrative data has been challenged,  
28 and sampling of local clinical units was not feasible. The Dr Foster Global Frailty Score was  
29 based on diagnostic codes and thus did not fully encompass all dimensions of frailty such as  
30 functional and socio-environmental measures as these are not well coded in the  
31 administrative data at this time. Future work linking the datasets to pharmacy, social care,  
32 primary care and registry data may provide for a richer comprehensive case-mix adjustment.  
33 A small proportion of the validation cohort may have been duplicated from the derivation  
34 cohort (eight hospitals in calendar year 2013). However, using national data from several  
35 calendar years minimises the effect of this overlap.  
36  
37  
38  
39  
40  
41  
42  
43

44 Our study adds to the existing literature regarding the secondary use of administrative data  
45 for case-mix adjustment in general, and for hospitalised older persons in particular. It links  
46 the clinically valid concept of frailty syndromes to a reproducible method of measurement  
47 within administrative datasets. The Dr Foster Global Frailty Score may potentially be used to  
48 routinely identify older persons at risk of adverse outcomes for the purposes of targeted  
49 resource allocation, commissioning or service development. It may form the basis of a global  
50 comparator of risk adjustment for older persons.  
51  
52  
53  
54  
55  
56  
57  
58  
59  
60

## Conclusion

Frailty Syndromes can be feasibly coded in international secondary care administrative datasets. The Dr Foster Global Frailty Score based on coded frailty syndromes significantly predicts in-hospital mortality and upper quartile length of stay in international datasets, and additionally 30-day non-elective readmission in England's national hospital dataset. It has predictive power beyond that of the Elixhauser co-morbidity score within these datasets. This methodology may be feasibly utilised for case-mix adjustment for older persons across the international setting.

## Figures Legend

Figure 1: Example of 2-step multivariable logistic regression process for the outcome of upper quartile length of stay.

Figure 2a: Percentage Volume of patients aged  $\geq 75$  year to total volume by country and year within Global Comparators Dataset

Figure 2b: Frequency of coding for frailty syndromes by country for year 2013 within Global Comparators Dataset (colour scale by country) in patients aged  $\geq 75$  years

## Funding statement

This research received no specific grant from any funding agency in the public, commercial or not-for-profit sectors

## Competing interest statement

CP has shares in Fidelity Health, has been a consultant for Merck and the Institute for Healthcare Improvement.

## Ethics approval

As per Governance Arrangements for Research Ethics Committees (GAfREC), research limited to secondary use of information previously collected in the course of normal care (without an intention to use it for research at the time of collection), provided that the patients or service users are not identifiable to the research team in carrying out the research.

## Patient and Public Involvement

Patients were not involved in this study

## Authors contribution

JTYS conceived study, designed analysis, interpreted results and wrote first draft. AH conceived study, designed analysis, interpreted results. JK, DL, CP and CC designed analysis, interpreted results and contributed to ongoing writing. AB and DB interpreted results and contributed to ongoing writing.

## Data Sharing

No supplementary data sharing

## Acknowledgements

No further acknowledgment

## References

1. World Population Ageing. United Nations, Department of Economic and Social Affairs, Population Division; 2013.
2. Survey of public attitudes and behaviours towards the environment. Department for Environment, Food and Rural Affairs (Defra); 2011.
3. Marengoni A, Angleman S, Melis R, Mangialasche F, Karp A, Garmen A, et al. Aging with multimorbidity: a systematic review of the literature. *Ageing Res Rev.* 2011;10(4):430-9.
4. Family Resources Survey. Department for Work & Pensions; 2014/2015.
5. Lacas A, Rockwood K. Frailty in primary care: a review of its conceptualization and implications for practice. *BMC Medicine.* 2012;10(1):4.
6. Maggio M, Guralnik J, Longo D, Ferrucci L. Interleukin-6 in aging and chronic disease: a magnificent pathway. *J Gerontol A Biol Sci Med Sci.* 2006;61(6):575-84.
7. Bruunsgaard H, Bjerregaard E, Schroll M, Pedersen B. Muscle Strength After Resistance Training Is Inversely Correlated with Baseline Levels of Soluble Tumor Necrosis Factor Receptors in the Oldest Old. *Journal of the American Geriatrics Society.* 52(2):237-41.
8. Cesari M, Leeuwenburgh C, Lauretani F, Onder G, Bandinelli S, Maraldi C, et al. Frailty syndrome and skeletal muscle: results from the Invecchiare in Chianti study. *Am J Clin Nutr.* 2006;83(5):1142-8.
9. Roy CN. Anemia in Frailty. *Clin Geriatr Med.* 2011;27(1):67-78.
10. Baylis D, Bartlett DB, Syddall HE, Ntani G, Gale CR, Cooper C, et al. Immune-endocrine biomarkers as predictors of frailty and mortality: a 10-year longitudinal study in community-dwelling older people. *Age (Dordr).* 2012.
11. Varadhan R, Walston J, Cappola AR, Carlson MC, Wand GS, Fried LP. Higher levels and blunted diurnal variation of cortisol in frail older women. *J Gerontol A Biol Sci Med Sci.* 2008;63(2):190-5.
12. Kaiser M, Bandinelli S, Lunenfeld B. Frailty and the role of nutrition in older people. A review of the current literature. *Acta Biomed.* 2010;81 Suppl 1:37-45.
13. Hubbard RE, Lang IA, Llewellyn DJ, Rockwood K. Frailty, body mass index, and abdominal obesity in older people. *J Gerontol A Biol Sci Med Sci.* 2010;65(4):377-81.
14. Fulop T, Larbi A, Witkowski J, McElhaney J, Loeb M, Mitnitski A, et al. Aging, frailty and age-related diseases. *Biogerontology.* 2010;11(5):547-63.
15. Abbatecola AM, Paolisso G. Is there a relationship between insulin resistance and frailty syndrome? *Curr Pharm Des.* 2008;14(4):405-10.
16. Xue Q-L. The Frailty Syndrome: Definition and Natural History. *Clinics in Geriatric Medicine.* 27(1):1-15.

17. Fried LP, Ferrucci L, Darer J, Williamson JD, Anderson G. Untangling the concepts of disability, frailty, and comorbidity: implications for improved targeting and care. *J Gerontol A Biol Sci Med Sci.* 2004;59(3):255-63.
18. Yu R, Wu W-C, Leung J, Hu SC, Woo J. Frailty and Its Contributory Factors in Older Adults: A Comparison of Two Asian Regions (Hong Kong and Taiwan). *International Journal of Environmental Research and Public Health.* 2017;14(10):1096.
19. Hogan DB, Maxwell CJ, Afilalo J, Arora RC, Bagshaw SM, Basran J, et al. A Scoping Review of Frailty and Acute Care in Middle-Aged and Older Individuals with Recommendations for Future Research. *Canadian Geriatrics Journal.* 2017;20(1):22-37.
20. Lunney JR, Lynn J, Hogan C. Profiles of Older Medicare Decedents. *Journal of the American Geriatrics Society.* 2002;50(6):1108-12.
21. Sharabiani MT, Aylin P, Bottle A. Systematic review of comorbidity indices for administrative data. *Med Care.* 2012;50(12):1109-18.
22. Eilertsen TB, Kramer AM, Schlenker RE, Hrinkevich CA. Application of functional independence measure-function related groups and resource utilization groups-version III systems across post acute settings. *Med Care.* 1998;36(5):695-705.
23. Carpenter GI, Turner GF, Fowler RW. Casemix for inpatient care of elderly people: rehabilitation and post-acute care. *Casemix for the Elderly Inpatient Working Group. Age and Ageing.* 1997;26(2):123-31.
24. Eilertsen T, Kramer A, Schlenker R, Hrinkevich C. Application of Functional Independence Measure-Function Related Groups and Resource Utilization Groups-Version III Systems Across Post Acute Settings. *Med Care.* 1998;36(5):695-705.
25. Poss J, Hirdes J, Fries B, McKillop I, Chase M. Validation of Resource Utilization Groups Version III for Home Care (RUG-III/HC): Evidence From a Canadian Home Care Jurisdiction. *Med Care.* 2008;46(4):380-7.
26. Clegg A, Bates C, Young J, Ryan R, Nichols L, Ann Teale E, et al. Development and validation of an electronic frailty index using routine primary care electronic health record data. *Age Ageing.* 2016;45(3):353-60.
27. Bottle A, Aylin P, Bell D. Effect of the readmission primary diagnosis and time interval in heart failure patients: analysis of English administrative data. *European Journal of Heart Failure.* 2014;16(8):846-53.
28. McIsaac DI, Bryson GL, van Walraven C. Association of frailty and 1-year postoperative mortality following major elective noncardiac surgery: A population-based cohort study. *JAMA Surgery.* 2016;151(6):538-45.
29. Sternberg SA, Bentur N, Abrams C, Spalter T, Karpati T, Lemberger J, et al. Identifying frail older people using predictive modeling. *Am J Manag Care.* 2012;18(10):e392-7.
30. Desai Mayur M, Bogardus Sidney T, Williams Christianna S, Vitagliano G, Inouye Sharon K. Development and Validation of a Risk-Adjustment Index for Older Patients: The High-Risk Diagnoses for the Elderly Scale. *Journal of the American Geriatrics Society.* 2002;50(3):474-81.
31. Faurot KR, Funk MJ, Pate V, Brookhart MA, Patrick A, Hanson LC, et al. Using Claims Data to Predict Dependency in Activities of Daily Living as a Proxy for Frailty. *Pharmacoepidemiology and drug safety.* 2015;24(1):59-66.
32. Davidoff AJ, Hurria A, Zuckerman IH, Lichtman SM, Pandya N, Hussain A, et al. A Novel Approach to Improve Health Status Measurement in Observational Claims-based Studies of Cancer Treatment and Outcomes. *Journal of geriatric oncology.* 2013;4(2):157-65.
33. Dubois M-F, Dubuc N, Kröger E, Girard R, Hébert R. Assessing comorbidity in older adults using prescription claims data. *Journal of Pharmaceutical Health Services Research.* 2010;1(4):157-65.
34. *Acute Care Toolkit 3: Acute medical care for frail older people.* London: Royal College of Physicians; 2012.



- 1  
2  
3 35. Soong J, Poots A, Scott S, Donald K, Bell D. Developing and validating a risk prediction model  
4 for acute care based on frailty syndromes. *BMJ Open*. 2015;5(10):e008457.  
5 36. Soong J, Poots AJ, Scott S, Donald K, Woodcock T, Lovett D, et al. Quantifying the prevalence  
6 of frailty in English hospitals. *BMJ Open*. 2015;5(10):e008456.  
7 37. Bottle A, Middleton S, Kalkman Cor J, Livingston Edward H, Aylin P. Global Comparators  
8 Project: International Comparison of Hospital Outcomes Using Administrative Data. *Health Services  
9 Research*. 2013;48(6pt1):2081-100.  
10 38. Bottle A, Aylin P. Comorbidity scores for administrative data benefited from adaptation to  
11 local coding and diagnostic practices. *J Clin Epidemiol*. 2011;64(12):1426-33.  
12 39. Hosmer DW, Hosmer T, Le Cessie S, Lemeshow S. A comparison of goodness-of-fit tests for  
13 the logistic regression model. *Stat Med*. 1997;16(9):965-80.  
14 40. Fox J, Monette G. Generalized Collinearity Diagnostics. *Journal of the American Statistical  
15 Association*. 1992;87(417):178-83.  
16 41. Gilbert T, Neuburger J, Kraindler J, Keeble E, Smith P, Ariti C, et al. Development and  
17 validation of a Hospital Frailty Risk Score focusing on older people in acute care settings using  
18 electronic hospital records: an observational study. *The Lancet*. 2018;391(10132):1775-82.  
19 42. Prytherch DR, Smith GB, Schmidt PE, Featherstone PI. ViEWS--Towards a national early  
20 warning score for detecting adult inpatient deterioration. *Resuscitation*. 2010;81(8):932-7.  
21 43. Rudd AG, Lowe D, Hoffman A, Irwin P, Pearson M. Secondary prevention for stroke in the  
22 United Kingdom: results from the National Sentinel Audit of Stroke. *Age and ageing*. 2004;33(3):280-  
23 6.  
24 44. Ruiz M, Bottle A, Long S, Aylin P. Multi-Morbidity in Hospitalised Older Patients: Who Are the  
25 Complex Elderly? . *PLoS ONE*. 2015;10(12).  
26  
27  
28  
29  
30  
31  
32  
33  
34  
35  
36  
37  
38  
39  
40  
41  
42  
43  
44  
45  
46  
47  
48  
49  
50  
51  
52  
53  
54  
55  
56  
57  
58  
59  
60



1  
2  
3  
4  
5  
6  
7  
8  
9  
10  
11  
12  
13  
14  
15  
16  
17  
18  
19  
20  
21  
22  
23  
24  
25  
26  
27  
28  
29  
30  
31  
32  
33  
34  
35  
36  
37  
38  
39  
40  
41  
42  
43  
44  
45  
46  
47  
48  
49  
50  
51  
52  
53  
54  
55  
56  
57  
58  
59  
60

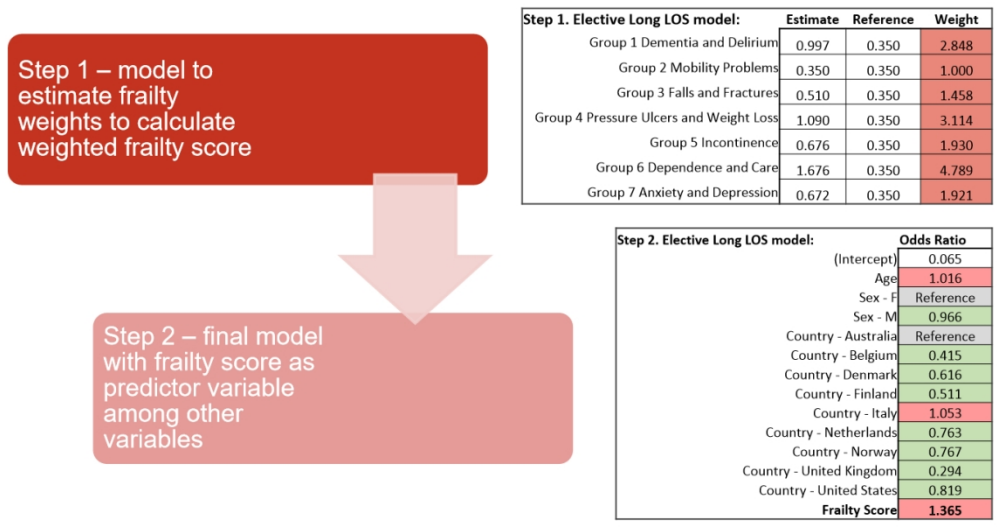

Figure 1: Example of 2-step multivariable logistic regression process for the outcome of upper quartile length of stay.

240x126mm (144 x 144 DPI)

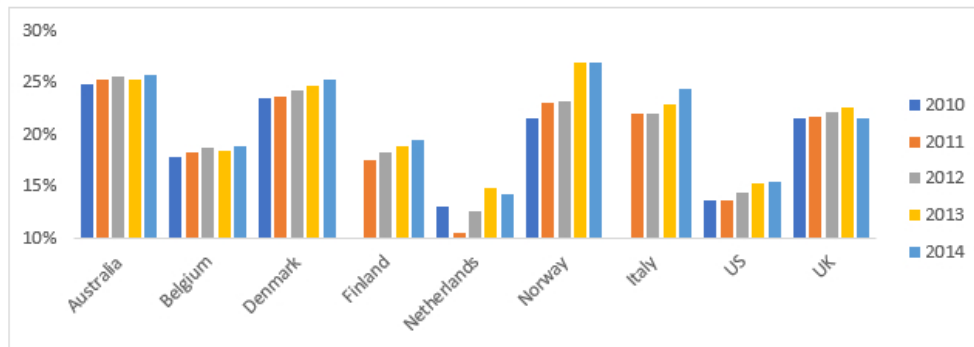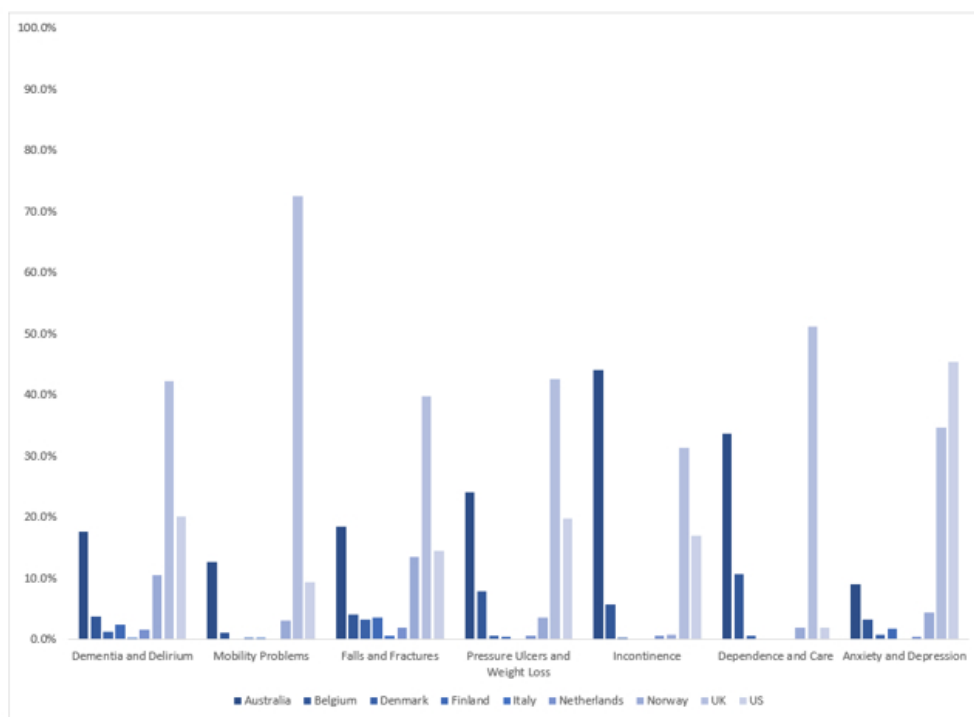

Figure 2a: Percentage Volume of patients aged ≥ 75 year to total volume by country and year within Global Comparators Dataset

Figure 2b: Frequency of coding for frailty syndromes by country for year 2013 within Global Comparators Dataset (colour scale by country) in patients aged ≥ 75 years

114x125mm (144 x 144 DPI)

## Appendix 1 ICD-10 and ICD-9 coding for frailty syndromes

| Group                           | ICD-10                      | Description (ICD-10)                                                                         | ICD-9                                                                                      | Description (ICD-9)                                                               |                                                              |
|---------------------------------|-----------------------------|----------------------------------------------------------------------------------------------|--------------------------------------------------------------------------------------------|-----------------------------------------------------------------------------------|--------------------------------------------------------------|
| <b>1. Dementia and Delirium</b> | F00                         | Dementia in Alzheimer's disease                                                              | 2904                                                                                       | Arteriosclerotic dementia                                                         |                                                              |
|                                 | F01                         | Vascular dementia                                                                            | 2941-2942                                                                                  | Dementia in other diseases and unspecified dementia                               |                                                              |
|                                 | F02                         | Dementia in other diseases classified elsewhere                                              | 2930-2931                                                                                  | Subacute delirium and delirium due to conditions classified elsewhere             |                                                              |
|                                 | F03                         | Unspecified dementia                                                                         | V4031                                                                                      | Wandering in diseases classified elsewhere                                        |                                                              |
|                                 | F05                         | Delirium not induced by alcohol and other psychoactive                                       | 3310                                                                                       | Alzheimer's disease                                                               |                                                              |
|                                 | G30                         | Alzheimer's disease                                                                          | 3312                                                                                       | Senile degeneration of brain                                                      |                                                              |
|                                 | G31<br>1                    | Senile degeneration of brain, not elsewhere classified                                       | 2900-2903                                                                                  | Senile and presenile dementia, dementia with delirium                             |                                                              |
|                                 | G31<br>0                    | Circumscribed brain atrophy                                                                  | 33119                                                                                      | Other frontotemporal dementia                                                     |                                                              |
|                                 | F04                         | Organic amnesic syndrome, not induced by alcohol and other psychoactive substances           | 33182                                                                                      | Dementia with lewy bodies                                                         |                                                              |
|                                 | R41                         | Other symptoms and signs involving cognitive functions and awareness                         | 2908-2909                                                                                  | Other senile psychotic conditions                                                 |                                                              |
|                                 |                             |                                                                                              | 2948-2949                                                                                  | Other persistent mental disorders due to conditions classified elsewhere          |                                                              |
|                                 |                             |                                                                                              | 2940                                                                                       | Amnesic disorder in conditions classified elsewhere                               |                                                              |
|                                 | <b>2. Mobility Problems</b> | R26                                                                                          | Abnormalities of gait and mobility                                                         | 7812                                                                              | Abnormality of gait                                          |
|                                 |                             | R29<br>8                                                                                     | Other and unspecified symptoms and signs involving the nervous and musculoskeletal systems | 78199                                                                             | Other symptoms involving nervous and musculoskeletal systems |
| <b>3. Falls and Fractures</b>   | S32                         | Fracture of lumbar spine and pelvis                                                          | 8054-8055                                                                                  | Fracture of lumbar vertebra without mention of spinal cord injury                 |                                                              |
|                                 | S33                         | Dislocation, sprain and strain of joints and ligaments of lumbar spine and pelvis            | 8064-8065                                                                                  | Fracture of lumbar spine with spinal cord injury                                  |                                                              |
|                                 | S42                         | Fracture of shoulder and upper arm                                                           | 8056-8057                                                                                  | Fracture of sacrum and coccyx without mention of spinal cord injury               |                                                              |
|                                 | S43                         | Dislocation, sprain and strain of joints and ligaments of shoulder girdle                    | 8066-8067                                                                                  | Fracture of sacrum & coccyx with spinal cord injury                               |                                                              |
|                                 | S52                         | Fracture of forearm                                                                          | 808-809                                                                                    | Fracture of pelvis and ill-defined fractures of bones of trunk                    |                                                              |
|                                 | S53                         | Dislocation, sprain and strain of joints and ligaments of elbow                              | 8392-8393                                                                                  | Dislocation, thoracic & lumbar vertebra                                           |                                                              |
|                                 | S62                         | Fracture at wrist and hand level                                                             | 83941-83952                                                                                | Dislocation, coccyx and sacrum                                                    |                                                              |
|                                 | S63                         | Dislocation, sprain and strain of joints and ligaments at wrist and hand level               | 846                                                                                        | Sprains & strains of sacroiliac region                                            |                                                              |
|                                 | S72                         | Fracture of femur                                                                            | 8472-8474                                                                                  | Sprain of lumbar, sacrum, coccyx                                                  |                                                              |
|                                 | S73                         | Dislocation, sprain and strain of joint and ligaments of hip                                 | 8485                                                                                       | Sprain of pelvic                                                                  |                                                              |
|                                 | W0-<br>W1                   | Falls                                                                                        | 810-812                                                                                    | Fracture of clavicle, scapula, humerus                                            |                                                              |
|                                 | M8<br>0                     | Osteoporosis with pathological fracture                                                      | 831-835                                                                                    | Dislocation of shoulder, elbow, wrist, finger, hip                                |                                                              |
|                                 | M8<br>1                     | Osteoporosis without pathological fracture                                                   | 840-843                                                                                    | Sprains & strains of shoulder, upper arm, elbow, forearm, wrist, hand, hip, thigh |                                                              |
|                                 | R29<br>6                    | Tendency to fall, not elsewhere classified                                                   | 83961 & 83971                                                                              | Dislocation, sternum                                                              |                                                              |
|                                 | R55                         | Syncope and collapse                                                                         | 8484                                                                                       | Sternum sprain                                                                    |                                                              |
|                                 | R54                         | Senility                                                                                     | 813-817                                                                                    | Fracture of radius & ulna, carpal bone(s), metacarpal bone(s), phalanges of hand  |                                                              |
|                                 | M9<br>66                    | Fracture of bone following insertion of orthopaedic implant, joint prosthesis, or bone plate | 820-821                                                                                    | Fracture of neck of femur and other parts of femur                                |                                                              |
|                                 |                             | E88                                                                                          | Falls                                                                                      |                                                                                   |                                                              |

|                                           |          |                                                              |       |                                                                         |
|-------------------------------------------|----------|--------------------------------------------------------------|-------|-------------------------------------------------------------------------|
|                                           |          |                                                              | 7330  | Osteoporosis                                                            |
|                                           |          |                                                              | 7331  | Pathological fracture                                                   |
|                                           |          |                                                              | V1588 | History of fall                                                         |
|                                           |          |                                                              | 7802  | Syncope and collapse                                                    |
|                                           |          |                                                              | 797   | Senility without mention of psychosis                                   |
|                                           |          |                                                              | 9964  | Mechanical complication of internal orthopedic device implant and graft |
| <b>4. Pressure Ulcers and Weight Loss</b> | L89      | Decubitus ulcer and pressure area                            | 7072  | Pressure ulcer                                                          |
|                                           | R63<br>4 | Abnormal weight loss                                         | 7070  | Decubitus ulcer                                                         |
|                                           | R63<br>6 | Insufficient intake of food and water due to self neglect    | 7832  | Abnormal Loss of Weight                                                 |
|                                           | Z72<br>4 | Inappropriate diet and eating habits                         | V691  | Inappropriate diet and eating habits                                    |
| <b>5. Incontinence</b>                    | R32      | Unspecified urinary incontinence                             | 7883  | Incontinence of urine                                                   |
|                                           | R15      | Faecal incontinence                                          | 7876  | Incontinence of feces                                                   |
| <b>6. Dependence and Care</b>             | Z74      | Problems related to care-provider dependency                 | V604  | No other household member able to render care                           |
|                                           | Z75      | Problems related to medical facilities and other health care | V63   | Unavailability of other medical facilities for care                     |
| <b>7. Anxiety and Depression</b>          | F38      | Other mood [affective] disorders                             | 2969  | Other & unspecified affective psychoses                                 |
|                                           | F41      | Other anxiety disorders                                      | 3000  | Anxiety states                                                          |
|                                           | F43      | Reaction to severe stress, and adjustment disorders          | 308   | Acute reaction to stress                                                |
|                                           | F44      | Dissociative [conversion] disorders                          | 309   | Adjustment reaction                                                     |
|                                           | F06<br>4 | Organic anxiety disorder                                     | 3001  | Hysteria                                                                |
|                                           | F32      | Depressive episode                                           | 2962  | Major depressive disorder, single episode                               |
|                                           | F33      | Recurrent depressive disorder                                | 2963  | Major depressive disorder, recurrent episode                            |
|                                           | F20<br>4 | Post-schizophrenic depression                                | 2965  | Bipolar affective disorder, depressed                                   |
|                                           | F25<br>1 | Schizoaffective disorder, depressive type                    | 3004  | Dysthymic disorder                                                      |
|                                           | F31      | Bipolar affective disorder                                   | 3090  | Adjustment disorder with depressed mood                                 |
|                                           | F34<br>1 | Dysthymia                                                    | 3091  | Prolonged depressive reaction                                           |
|                                           | F41<br>2 | Mixed anxiety and depressive disorder                        | 3092  | Adjustment reaction with predominant disturbance of other emotions      |
|                                           | F43<br>2 | Adjustment disorders                                         | 2968  | Manic-depressive psychosis, other & unspecified                         |
|                                           |          |                                                              | 2980  | Depressive type psychosis                                               |
|                                           |          |                                                              | 3011  | Affective personality disorder                                          |
|                                           |          |                                                              | 311   | Depressive disorder, not elsewhere classified                           |

Appendix 2: Odds Ratios for Frailty Score after adjustment for age, gender, country for the outcomes of in-hospital mortality, 30-day non-elective readmission and upper quartile length of stay (for country), by elective and non-elective population groups within the Global Comparators Dataset (Derivation)

### In-hospital mortality

Table 12: Odds Ratios of Frailty Score for in-hospital mortality adjusted for age, gender country within each subgroup (elective and non-elective)

#### Elective

|                          | Odds Ratio | Lower CI | Upper CI | P-value |
|--------------------------|------------|----------|----------|---------|
| (Intercept)              | 0.001      | 0.000    | 0.001    | <0.001  |
| Age                      | 1.041      | 1.029    | 1.054    | <0.001  |
| Sex - F                  | Reference  |          |          |         |
| Sex - M                  | 1.441      | 1.277    | 1.626    | <0.001  |
| Country - Australia      | Reference  |          |          |         |
| Country - Belgium        | 1.039      | 0.836    | 1.292    | 0.730   |
| Country - Denmark        | 0.913      | 0.668    | 1.248    | 0.569   |
| Country - Finland        | 0.318      | 0.227    | 0.446    | <0.001  |
| Country - Italy          | 0.702      | 0.496    | 0.994    | 0.046   |
| Country - Netherlands    | 1.413      | 1.107    | 1.803    | 0.005   |
| Country - Norway         | 0.616      | 0.492    | 0.770    | <0.001  |
| Country - United Kingdom | 0.566      | 0.467    | 0.686    | <0.001  |
| Country - United States  | 0.838      | 0.686    | 1.023    | 0.082   |
| Frailty Score            | 1.277      | 1.247    | 1.308    | <0.001  |

#### Non-elective

|                          | Odds Ratio | Lower CI | Upper CI | P-value |
|--------------------------|------------|----------|----------|---------|
| (Intercept)              | 0.002      | 0.002    | 0.003    | <0.001  |
| Age                      | 1.040      | 1.037    | 1.043    | <0.001  |
| Sex - F                  | Reference  |          |          |         |
| Sex - M                  | 1.305      | 1.265    | 1.346    | <0.001  |
| Country - Australia      | Reference  |          |          |         |
| Country - Belgium        | 1.338      | 1.213    | 1.478    | <0.001  |
| Country - Denmark        | 1.480      | 1.371    | 1.598    | <0.001  |
| Country - Finland        | 0.936      | 0.864    | 1.015    | 0.109   |
| Country - Italy          | 1.682      | 1.462    | 1.936    | <0.001  |
| Country - Netherlands    | 1.525      | 1.361    | 1.709    | <0.001  |
| Country - Norway         | 1.001      | 0.942    | 1.062    | 0.987   |
| Country - United Kingdom | 1.492      | 1.419    | 1.570    | <0.001  |
| Country - United States  | 0.897      | 0.844    | 0.953    | <0.001  |
| Frailty Score            | 1.109      | 1.103    | 1.116    | <0.001  |

30-day non-elective readmission

Table 13: Odds Ratios of Frailty Score for 30-day non-elective readmission adjusted for age, gender country within each subgroup (elective and non-elective)

Elective

|                          | Odds Ratio | Lower CI | Upper CI | P-value |
|--------------------------|------------|----------|----------|---------|
| (Intercept)              | 0.037      | 0.021    | 0.065    | <0.001  |
| Age                      | 1.002      | 0.995    | 1.009    | 0.622   |
| Sex - F                  | Reference  |          |          |         |
| Sex - M                  | 1.159      | 1.087    | 1.236    | <0.001  |
| Country - Australia      | Reference  |          |          |         |
| Country - Belgium        | 0.893      | 0.758    | 1.053    | 0.179   |
| Country - Denmark        | 1.573      | 1.339    | 1.847    | <0.001  |
| Country - Finland        | 1.153      | 1.003    | 1.326    | 0.045   |
| Country - Italy          | 0.500      | 0.391    | 0.640    | <0.001  |
| Country - Netherlands    | 1.174      | 0.988    | 1.395    | 0.068   |
| Country - Norway         | 1.616      | 1.434    | 1.821    | <0.001  |
| Country - United Kingdom | 1.094      | 0.975    | 1.228    | 0.125   |
| Country - United States  | 1.323      | 1.168    | 1.498    | <0.001  |
| Admission History        | 1.453      | 1.411    | 1.495    | <0.001  |
| Frailty Score            | 1.106      | 1.060    | 1.154    | <0.001  |

Non-elective

|                          | Odds Ratio | Lower CI | Upper CI | P-value |
|--------------------------|------------|----------|----------|---------|
| (Intercept)              | 0.112      | 0.091    | 0.136    | <0.001  |
| Age                      | 0.998      | 0.996    | 1.001    | 0.201   |
| Sex - F                  | Reference  |          |          |         |
| Sex - M                  | 1.167      | 1.137    | 1.198    | <0.001  |
| Country - Australia      | Reference  |          |          |         |
| Country - Belgium        | 0.803      | 0.722    | 0.893    | <0.001  |
| Country - Denmark        | 1.317      | 1.231    | 1.408    | <0.001  |
| Country - Finland        | 0.995      | 0.931    | 1.063    | 0.879   |
| Country - Italy          | 0.760      | 0.646    | 0.893    | 0.001   |
| Country - Netherlands    | 0.774      | 0.683    | 0.877    | <0.001  |
| Country - Norway         | 1.582      | 1.507    | 1.660    | <0.001  |
| Country - United Kingdom | 1.362      | 1.302    | 1.425    | <0.001  |
| Country - United States  | 1.274      | 1.211    | 1.340    | <0.001  |
| Admission History        | 1.315      | 1.303    | 1.326    | <0.001  |
| Frailty Score            | 1.056      | 1.031    | 1.082    | <0.001  |

## Upper Quartile Length of Stay (for country)

Table 14: Odds Ratios of Frailty Score for Upper Quartile Length of Stay (for country) adjusted for age, gender country within each subgroup (elective and non-elective)

## Elective

|                          | Odds Ratio | Lower CI | Upper CI | P-value |
|--------------------------|------------|----------|----------|---------|
| (Intercept)              | 0.065      | 0.045    | 0.094    | <0.001  |
| Age                      | 1.016      | 1.011    | 1.020    | <0.001  |
| Sex - F                  | Reference  |          |          |         |
| Sex - M                  | 0.966      | 0.927    | 1.008    | 0.112   |
| Country - Australia      | Reference  |          |          |         |
| Country - Belgium        | 0.415      | 0.376    | 0.457    | <0.001  |
| Country - Denmark        | 0.616      | 0.549    | 0.691    | <0.001  |
| Country - Finland        | 0.511      | 0.467    | 0.558    | <0.001  |
| Country - Italy          | 1.053      | 0.953    | 1.162    | 0.310   |
| Country - Netherlands    | 0.763      | 0.691    | 0.843    | <0.001  |
| Country - Norway         | 0.767      | 0.713    | 0.825    | <0.001  |
| Country - United Kingdom | 0.294      | 0.273    | 0.316    | <0.001  |
| Country - United States  | 0.819      | 0.765    | 0.878    | <0.001  |
| Frailty Score            | 1.365      | 1.347    | 1.382    | <0.001  |

## Non-elective

|                          | Odds Ratio | Lower CI | Upper CI | P-value |
|--------------------------|------------|----------|----------|---------|
| (Intercept)              | 0.284      | 0.245    | 0.330    | <0.001  |
| Age                      | 0.995      | 0.993    | 0.996    | <0.001  |
| Sex - F                  | Reference  |          |          | <0.001  |
| Sex - M                  | 1.055      | 1.034    | 1.076    | <0.001  |
| Country - Australia      | Reference  |          |          | <0.001  |
| Country - Belgium        | 1.766      | 1.658    | 1.881    | <0.001  |
| Country - Denmark        | 1.570      | 1.492    | 1.652    | <0.001  |
| Country - Finland        | 1.705      | 1.628    | 1.786    | <0.001  |
| Country - Italy          | 2.270      | 2.074    | 2.484    | <0.001  |
| Country - Netherlands    | 2.268      | 2.112    | 2.435    | <0.001  |
| Country - Norway         | 1.303      | 1.254    | 1.353    | <0.001  |
| Country - United Kingdom | 1.508      | 1.459    | 1.559    | <0.001  |
| Country - United States  | 1.434      | 1.382    | 1.488    | <0.001  |
| Frailty Score            | 1.199      | 1.194    | 1.205    | <0.001  |

Appendix 3: Odds Ratios for Frailty Score after adjustment for age, gender, calendar year for the outcomes of in-hospital mortality, 30-day non-elective readmission and upper quartile length of stay (for country), by elective and non-elective population groups in Hospital Episode Statistics dataset (Validation)

### In-hospital mortality

Table 15: Odds Ratios of Frailty Score for in-hospital mortality adjusted for age, gender and calendar year within each subgroup (elective and non-elective)

#### Elective

|                      | Odds Ratio   | Lower CI     | Upper CI     | Z-value        | P-value      |
|----------------------|--------------|--------------|--------------|----------------|--------------|
| (Intercept)          | 0.001        | 0.001        | 0.001        | -338.153       | 0.000        |
| Age                  | 1.051        | 1.050        | 1.051        | 206.705        | 0.000        |
| Sex - F              | Reference    |              |              |                |              |
| Sex - M              | 1.274        | 1.267        | 1.281        | 84.839         | 0.000        |
| Calendar Year - 2012 | Reference    |              |              |                |              |
| Calendar Year - 2013 | 0.938        | 0.931        | 0.945        | -16.172        | 0.000        |
| Calendar Year - 2014 | 0.851        | 0.844        | 0.857        | -40.603        | 0.000        |
| Calendar Year - 2015 | 0.865        | 0.858        | 0.871        | -36.727        | 0.000        |
| <b>Frailty Score</b> | <b>1.173</b> | <b>1.171</b> | <b>1.174</b> | <b>279.196</b> | <b>0.000</b> |

#### Non-elective

|                      | Odds Ratio   | Lower CI     | Upper CI     | Z-value        | P-value      |
|----------------------|--------------|--------------|--------------|----------------|--------------|
| (Intercept)          | 0.001        | 0.001        | 0.001        | -353.600       | 0.000        |
| Age                  | 1.055        | 1.055        | 1.056        | 227.822        | 0.000        |
| Sex - F              | Reference    |              |              |                |              |
| Sex - M              | 1.233        | 1.226        | 1.240        | 73.302         | 0.000        |
| Calendar Year - 2012 | Reference    |              |              |                |              |
| Calendar Year - 2013 | 0.936        | 0.929        | 0.944        | -16.598        | 0.000        |
| Calendar Year - 2014 | 0.850        | 0.844        | 0.857        | -40.640        | 0.000        |
| Calendar Year - 2015 | 0.869        | 0.862        | 0.876        | -35.371        | 0.000        |
| <b>Frailty Score</b> | <b>1.108</b> | <b>1.107</b> | <b>1.109</b> | <b>315.847</b> | <b>0.000</b> |



## 30-day non-elective readmission

Table 16: Odds Ratios of Frailty Score for 30-day non-elective readmission adjusted for age, gender and calendar year within each subgroup (elective and non-elective)

## Elective

|                               | <b>Odds Ratio</b> | <b>Lower CI</b> | <b>Upper CI</b> | <b>Z-value</b> | <b>P-value</b> |
|-------------------------------|-------------------|-----------------|-----------------|----------------|----------------|
| (Intercept)                   | 0.055             | 0.054           | 0.057           | -186.458       | 0.000          |
| Age                           | 1.011             | 1.010           | 1.011           | 58.247         | 0.000          |
| Sex - F                       | Reference         |                 |                 |                |                |
| Sex - M                       | 1.119             | 1.114           | 1.123           | 53.787         | 0.000          |
| Calendar Year - 2012          | Reference         |                 |                 |                |                |
| Calendar Year - 2013          | 0.994             | 0.989           | 1               | -1.918         | 0.055          |
| Calendar Year - 2014          | 1.015             | 1.009           | 1.021           | 5.090          | 0.000          |
| Calendar Year - 2015          | 1.018             | 1.012           | 1.024           | 6.228          | 0.000          |
| Previous Emergency Admissions | 1.443             | 1.440           | 1.445           | 379.358        | 0.000          |
| <b>Frailty Score</b>          | 1.045             | 1.044           | 1.047           | 77.860         | 0.000          |

## Non-elective

|                               | <b>Odds Ratio</b> | <b>Lower CI</b> | <b>Upper CI</b> | <b>Z-value</b> | <b>P-value</b> |
|-------------------------------|-------------------|-----------------|-----------------|----------------|----------------|
| (Intercept)                   | 0.053             | 0.051           | 0.054           | -191.317       | 0.000          |
| Age                           | 1.011             | 1.011           | 1.012           | 62.570         | 0.000          |
| Sex - F                       | Reference         |                 |                 |                |                |
| Sex - M                       | 1.121             | 1.117           | 1.126           | 54.752         | 0.000          |
| Calendar Year - 2012          | Reference         |                 |                 |                |                |
| Calendar Year - 2013          | 0.993             | 0.987           | 0.998           | -2.526         | 0.012          |
| Calendar Year - 2014          | 1.012             | 1.007           | 1.018           | 4.231          | 0.000          |
| Calendar Year - 2015          | 1.015             | 1.010           | 1.021           | 5.218          | 0.000          |
| Previous Emergency Admissions | 1.439             | 1.436           | 1.442           | 376.406        | 0.000          |
| <b>Frailty Score</b>          | 1.030             | 1.030           | 1.031           | 85.172         | 0.000          |

## Upper quartile length of stay

Table 17: Odds Ratios of Frailty Score for upper quartile length of stay adjusted for age, gender and calendar year within each subgroup (elective and non-elective)

## Elective

|                      | <b>Odds Ratio</b> | <b>Lower CI</b> | <b>Upper CI</b> | <b>Z-value</b> | <b>P-value</b> |
|----------------------|-------------------|-----------------|-----------------|----------------|----------------|
| (Intercept)          | 0.030             | 0.029           | 0.031           | -258.331       | 0.000          |
| Age                  | 1.023             | 1.023           | 1.024           | 143.925        | 0.000          |
| Sex - F              | Reference         |                 |                 |                |                |
| Sex - M              | 0.940             | 0.937           | 0.944           | -32.930        | 0.000          |
| Calendar Year - 2012 | Reference         |                 |                 |                |                |
| Calendar Year - 2013 | 0.975             | 0.970           | 0.980           | -9.874         | 0.000          |
| Calendar Year - 2014 | 0.891             | 0.886           | 0.895           | -44.736        | 0.000          |
| Calendar Year - 2015 | 0.872             | 0.868           | 0.877           | -52.705        | 0.000          |
| <b>Frailty Score</b> | <b>1.193</b>      | <b>1.192</b>    | <b>1.193</b>    | <b>593.715</b> | <b>0.000</b>   |

## Non-elective

|                      | <b>Odds Ratio</b> | <b>Lower CI</b> | <b>Upper CI</b> | <b>Z-value</b> | <b>P-value</b> |
|----------------------|-------------------|-----------------|-----------------|----------------|----------------|
| (Intercept)          | 0.031             | 0.030           | 0.032           | -255.862       | 0.000          |
| Age                  | 1.023             | 1.022           | 1.023           | 139.087        | 0.000          |
| Sex - F              | Reference         |                 |                 |                |                |
| Sex - M              | 0.948             | 0.944           | 0.951           | -28.576        | 0.000          |
| Calendar Year - 2012 | Reference         |                 |                 |                |                |
| Calendar Year - 2013 | 0.979             | 0.974           | 0.984           | -8.288         | 0.000          |
| Calendar Year - 2014 | 0.896             | 0.891           | 0.900           | -42.538        | 0.000          |
| Calendar Year - 2015 | 0.878             | 0.874           | 0.883           | -50.020        | 0.000          |
| <b>Frailty Score</b> | <b>1.055</b>      | <b>1.055</b>    | <b>1.055</b>    | <b>602.049</b> | <b>0.000</b>   |

## Appendix 4 Case-mix adjustment for older persons utilising administrative data

| Author              | Year | Country        | Study population                                                                       | N      | Data Source                                                                                         | Outcome                           | Predictors                                                                                                                                    | Model performance                                                |
|---------------------|------|----------------|----------------------------------------------------------------------------------------|--------|-----------------------------------------------------------------------------------------------------|-----------------------------------|-----------------------------------------------------------------------------------------------------------------------------------------------|------------------------------------------------------------------|
| Von Korff et al.(1) | 1991 | United States  | Population based pharmacy data                                                         | 122911 | Administrative                                                                                      | Mortality and hospitalisation     | Consensus based Chronic Disease Score(CDS)                                                                                                    |                                                                  |
| Rosen et al.(2)     | 2001 | United States  | Long-term facility resident (Veterans Affairs)                                         | 39839  | Administrative (Patient Assessment File(PAF), Patient Treatment File(PTF), Extended Care File(ECF)) | Decline in functional status      | International Classification of Diseases, Ninth Revision Clinical Modification (ICD-9) , demographics, treatments, activities of daily living | AUC for decline in functional status is 0.70                     |
| Desai et al.(3)     | 2002 | United States  | ≥70 admitted to geriatric service                                                      | 1376   | Administrative (Management Information System)                                                      | Mortality                         | International Classification of Diseases system version 9 (ICD-9)                                                                             | AUC 0.76 for mortality in derivation and AUV 0.68 in validation) |
| Kautter et al(4)    | 2004 | United States  | Medicare                                                                               | 17597  | Administrative The Medicare Current Beneficiary Survey (MCBS)                                       | Cost                              | ADLs, Long-term institution status, Age                                                                                                       |                                                                  |
| Roland et al.(5)    | 2005 | United Kingdom | Individual patients aged ≥ 65, ≥ 75, and ≥ 85who had at least two emergency admissions | 227206 | Administrative (Hospital Episode Statistics)                                                        | Non-elective hospital readmission | Individual patients aged ≥ 65who had at least two emergency admissions                                                                        |                                                                  |

|                         |      |                |                                                                    |        |                                                                           |                                                                                                                                          |                                                                                                                                                                                                                                          |                                                                                   |
|-------------------------|------|----------------|--------------------------------------------------------------------|--------|---------------------------------------------------------------------------|------------------------------------------------------------------------------------------------------------------------------------------|------------------------------------------------------------------------------------------------------------------------------------------------------------------------------------------------------------------------------------------|-----------------------------------------------------------------------------------|
| Inoye et al.(6)         | 2008 | United States  | Primary care clinic                                                | 3919   | Administrative                                                            | Non-elective hospital admission                                                                                                          | Deyo-Charlson, comorbidity score $\geq 2$ , any prior hospitalization 6 or more primary care visits, $\geq 85$ years unmarried status                                                                                                    | AUC 0.73                                                                          |
| Sternberg et al.(7)     | 2012 | Israel         | Patients receiving Comprehensive Geriatric Assessment via OPD      | 221    | Administrative; and survey                                                | Resource utilisation (number of physician visits in 3 months, number of ED visits in a year, and number of hospitalizations in the year) | VES Frailty Score(13-item function-based self-report questionnaire The Adjusted Clinical Groups–diagnoses based predictive model (ACG Dx-PM) based on age, sex, diagnostic codes, and pharmacy data                                      | ACG predict frailty defined by VES – AUC 0.63                                     |
| Davidoff et al.(8)      | 2013 | United States  | US Medicare beneficiaries aged $\geq 65$ years                     | 14788  | Administrative (Medicare) and Medicare Current Beneficiary Survey (MCBS), | Disability Status                                                                                                                        | Healthcare services, Berenson-Eggers Type of Service (BETOS) codes- American Medical Association's Current Procedural Terminology (CPT) codes, or the CMS, Healthcare Common Procedure Coding System (HCPCS level II) codes, demographic | AUC 0.92 for disability status                                                    |
| Bottle et al.(9)        | 2014 | United Kingdom | Admitted with heart failure                                        | 84212  | Administrative (Hospital Episode statistics)                              | Non-elective hospital readmission                                                                                                        | AHRQ's (Agency for Healthcare Research and Quality) Clinical Classification System International Classification of Diseases system version 10 (ICD-10)                                                                                   |                                                                                   |
| Chrischilles et al.(10) | 2014 | United States  | US Medicare beneficiaries aged $\geq 65$ years admitted with acute | 144112 | Administrative                                                            | Mortality, cardiac catheterisation                                                                                                       | Demographic measures, cardiovascular conditions, comorbidities, previous hospitalization, and Function related indicators(FRI)                                                                                                           | AUC Mortality 0.74, AUC cardiac catheterisation 0.79, Including the FRIs improved |

|                   |      |                |                                                       |           |                                                               |                                                                  |                                                                                                                                                                                                                                                                                             |                                                                                                          |
|-------------------|------|----------------|-------------------------------------------------------|-----------|---------------------------------------------------------------|------------------------------------------------------------------|---------------------------------------------------------------------------------------------------------------------------------------------------------------------------------------------------------------------------------------------------------------------------------------------|----------------------------------------------------------------------------------------------------------|
|                   |      |                | myocardial infarction                                 |           |                                                               |                                                                  |                                                                                                                                                                                                                                                                                             | prediction models                                                                                        |
| Ruiz et al.(11)   | 2015 | United Kingdom | Individual patients aged ≥ 65 with hospital admission | 2788900   | Administrative (Hospital Episode Statistics)                  | Mortality, Non-elective hospital readmission, Hospital admission | ≥ 65 years old, who have at least 3 simultaneous diagnoses of major clinical conditions.                                                                                                                                                                                                    |                                                                                                          |
| Faurot et al.(12) | 2015 | United States  | ≥ 65 community dwelling                               | 6391      | Administrative and Medicare Current Beneficiary Survey (MCBS) | Functional decline                                               | demographics, International Classification of Diseases, Ninth Revision Clinical Modification (ICD-9) diagnosis/procedure and durable medical equipment codes for frailty-associated conditions, (Current Procedural Terminology (CPT) and Healthcare Common Procedure Coding System (HCPC)) |                                                                                                          |
| Hope et al.(13)   | 2015 | United States  | >70 admitted to ICU                                   | 47427     | Administrative (Medicare)                                     | Mortality                                                        | International Classification of Diseases, Ninth Revision Clinical Modification (ICD-9) diagnosis & claims for skilled nursing facility: creation of four categories: 1)Cancer 2)Chronic Organ Failure3)Frailty4) Robust                                                                     |                                                                                                          |
| Soong et al.      | 2015 | United Kingdom | >65 non-elective admission to hospital                | 2 099 252 | Administrative                                                | Mortality, non-elective readmission, functional decline          | ICD-10 coded Frailty Syndromes                                                                                                                                                                                                                                                              | AUC of 0.624–0.659 for inpatient mortality, 0.63–0.654 for institutionalisation and 0.57–0.63 for 30-day |

1  
2  
3  
4  
5  
6  
7  
8  
9  
10  
11  
12  
13  
14  
15  
16  
17  
18  
19  
20  
21  
22  
23  
24  
25  
26  
27  
28  
29  
30  
31  
32  
33  
34  
35  
36  
37  
38  
39  
40  
41  
42  
43  
44  
45  
46

|                    |      |                |                                                            |           |                                                                                                                 |                                                                 |                                                                                                                                                                                                              |                                                                                          |
|--------------------|------|----------------|------------------------------------------------------------|-----------|-----------------------------------------------------------------------------------------------------------------|-----------------------------------------------------------------|--------------------------------------------------------------------------------------------------------------------------------------------------------------------------------------------------------------|------------------------------------------------------------------------------------------|
|                    |      |                |                                                            |           |                                                                                                                 |                                                                 |                                                                                                                                                                                                              | emergency readmission.                                                                   |
| Briggs et al.(14)  | 2016 | Ireland        | Patients admitted with dementia to single hospital         | 929       | Administrative                                                                                                  | Cost                                                            | International Classification of Diseases system version 10 (ICD-10)                                                                                                                                          |                                                                                          |
| Mclsaac et al.(15) | 2016 | Canada         | >65 years Elective non-cardiac surgery                     | 202811    | Administrative Discharge Abstract Database, Ontario Health Insurance Plan Database, Registered Persons Database | Inpatient mortality                                             | John's Hopkins Adjusted Clinical Groups (ACG, Johns Hopkins University) frailty-defining diagnoses indicator,                                                                                                |                                                                                          |
| Kim et al.(16)     | 2017 | United States  | ≥ 65 community dwelling                                    | 10017     | Administrative (Medicare) and Medicare Current Beneficiary Survey (MCBS)                                        | Mortality, disability, mobility impairment, and recurrent falls | International Classification of Diseases, Ninth Revision Clinical Modification (ICD-9) (Current Procedural Terminology (CPT) and Healthcare Common Procedure Coding System (HCPC)) to create a frailty index |                                                                                          |
| Gilbert et al.(17) | 2018 | United Kingdom | >75 years elective and non-elective admissions to hospital | 1 013 590 | Administrative Hospital Episode Statistics                                                                      | Mortality, long length of stay, non-elective readmission        | ICD-10 Codes identified by cluster analysis for Bed days, Hospital costs, and ICD-10 coded Frailty Syndromes                                                                                                 | AUC 0-60 for 30-day mortality, 0-68 for long hospital stay, 0-56 for 30-day readmission. |

## References

1. Von Korff M, Wagner EH, Saunders K. A chronic disease score from automated pharmacy data. *Journal of Clinical Epidemiology*. 45(2):197-203.
2. Amy R, Jeanne W, Bei-Hung C, Dan B, Carter R, Arlene A, et al. Risk Adjustment for Measuring Health Outcomes: An Application in VA Long term Care. *American Journal of Medical Quality*. 2001;16(4):118-27.
3. Desai Mayur M, Bogardus Sidney T, Williams Christianna S, Vitagliano G, Inouye Sharon K. Development and Validation of a Risk-Adjustment Index for Older Patients: The High-Risk Diagnoses for the Elderly Scale. *Journal of the American Geriatrics Society*. 2002;50(3):474-81.
4. Kautter J, Pope GC. CMS Frailty Adjustment Model. *Health Care Financing Review*. 2004;26(2):1-19.
5. Roland M, Dusheiko M, Gravelle H, Parker S. Follow up of people aged 65 and over with a history of emergency admissions: analysis of routine admission data. *BMJ*. 2005;330(7486):289-92.
6. Inouye S, Md MPH, Zhang Y, Jones R, Shi P, Cupples L, et al. Risk Factors for Hospitalization Among Community-Dwelling Primary Care Older Patients: Development and Validation of a Predictive Model. *Med Care*. 2008;46(7):726-31.
7. Sternberg SA, Wershof Schwartz A, Karunanathan S, Bergman H, Mark Clarfield A. The identification of frailty: a systematic literature review. *J Am Geriatr Soc*. 2011;59(11):2129-38.
8. Davidoff AJ, Hurria A, Zuckerman IH, Lichtman SM, Pandya N, Hussain A, et al. A Novel Approach to Improve Health Status Measurement in Observational Claims-based Studies of Cancer Treatment and Outcomes. *Journal of geriatric oncology*. 2013;4(2):157-65.
9. Bottle A, Aylin P, Bell D. Effect of the readmission primary diagnosis and time interval in heart failure patients: analysis of English administrative data. *European Journal of Heart Failure*. 2014;16(8):846-53.
10. Chrischilles E, Schneider K, Wilwert J, Lessman G, O'Donnell B, Gryzlak B, et al. Beyond Comorbidity: Expanding the Definition and Measurement of Complexity Among Older Adults Using Administrative Claims Data. *Medical Care*. 2014;52:S75-S84.
11. Ruiz M, Bottle A, Long S, Aylin P. Multi-Morbidity in Hospitalised Older Patients: Who Are the Complex Elderly? . *PLoS ONE*. 2015;10(12).
12. Faurot KR, Funk MJ, Pate V, Brookhart MA, Patrick A, Hanson LC, et al. Using Claims Data to Predict Dependency in Activities of Daily Living as a Proxy for Frailty. *Pharmacoepidemiology and drug safety*. 2015;24(1):59-66.
13. Hope Aluko A, Gong Michelle N, Guerra C, Wunsch H. Frailty Before Critical Illness and Mortality for Elderly Medicare Beneficiaries. *Journal of the American Geriatrics Society*. 2015;63(6):1121-8.
14. Briggs R, Coary R, Collins R, Coughlan T, O'Neill D, Kennelly SP. Acute hospital care: how much activity is attributable to caring for patients with dementia? *QJM*. 2016;109(1):41-4.
15. McIsaac DI, Bryson GL, van Walraven C. Association of frailty and 1-year postoperative mortality following major elective noncardiac surgery: A population-based cohort study. *JAMA Surgery*. 2016;151(6):538-45.
16. Kim DH, Schneeweiss S, Glynn RJ, Lipsitz LA, Rockwood K, Avorn J. Measuring Frailty in Medicare Data: Development and Validation of a Claims-Based Frailty Index. *The Journals of Gerontology: Series A*. 2017:glx229-glx.
17. Gilbert T, Neuburger J, Kraindler J, Keeble E, Smith P, Ariti C, et al. Development and validation of a Hospital Frailty Risk Score focusing on older people in acute care settings using electronic hospital records: an observational study. *The Lancet*. 2018;391(10132):1775-82.

1  
2  
3  
4  
5  
6  
7  
8  
9  
10  
11  
12  
13  
14  
15  
16  
17  
18  
19  
20  
21  
22  
23  
24  
25  
26  
27  
28  
29  
30  
31  
32  
33  
34  
35  
36  
37  
38  
39  
40  
41  
42  
43  
44  
45  
46

For peer review only



## TRIPOD Checklist: Prediction Model Development and Validation

| Section/Topic                | Item | Checklist Item | Page                                                                                                                                                                                                  |               |
|------------------------------|------|----------------|-------------------------------------------------------------------------------------------------------------------------------------------------------------------------------------------------------|---------------|
| <b>Title and abstract</b>    |      |                |                                                                                                                                                                                                       |               |
| Title                        | 1    | D;V            | Identify the study as developing and/or validating a multivariable prediction model, the target population, and the outcome to be predicted.                                                          | 2             |
| Abstract                     | 2    | D;V            | Provide a summary of objectives, study design, setting, participants, sample size, predictors, outcome, statistical analysis, results, and conclusions.                                               | 3             |
| <b>Introduction</b>          |      |                |                                                                                                                                                                                                       |               |
| Background and objectives    | 3a   | D;V            | Explain the medical context (including whether diagnostic or prognostic) and rationale for developing or validating the multivariable prediction model, including references to existing models.      | 5             |
|                              | 3b   | D;V            | Specify the objectives, including whether the study describes the development or validation of the model or both.                                                                                     | 5             |
| <b>Methods</b>               |      |                |                                                                                                                                                                                                       |               |
| Source of data               | 4a   | D;V            | Describe the study design or source of data (e.g., randomized trial, cohort, or registry data), separately for the development and validation data sets, if applicable.                               | 6             |
|                              | 4b   | D;V            | Specify the key study dates, including start of accrual; end of accrual; and, if applicable, end of follow-up.                                                                                        | 6-7           |
| Participants                 | 5a   | D;V            | Specify key elements of the study setting (e.g., primary care, secondary care, general population) including number and location of centres.                                                          | 7             |
|                              | 5b   | D;V            | Describe eligibility criteria for participants.                                                                                                                                                       | 7             |
|                              | 5c   | D;V            | Give details of treatments received, if relevant.                                                                                                                                                     | NA            |
| Outcome                      | 6a   | D;V            | Clearly define the outcome that is predicted by the prediction model, including how and when assessed.                                                                                                | 9             |
|                              | 6b   | D;V            | Report any actions to blind assessment of the outcome to be predicted.                                                                                                                                | NA            |
| Predictors                   | 7a   | D;V            | Clearly define all predictors used in developing or validating the multivariable prediction model, including how and when they were measured.                                                         | 8-9, App 1    |
|                              | 7b   | D;V            | Report any actions to blind assessment of predictors for the outcome and other predictors.                                                                                                            | NA            |
| Sample size                  | 8    | D;V            | Explain how the study size was arrived at.                                                                                                                                                            | 7             |
| Missing data                 | 9    | D;V            | Describe how missing data were handled (e.g., complete-case analysis, single imputation, multiple imputation) with details of any imputation method.                                                  | 7             |
| Statistical analysis methods | 10a  | D              | Describe how predictors were handled in the analyses.                                                                                                                                                 | 8-10          |
|                              | 10b  | D              | Specify type of model, all model-building procedures (including any predictor selection), and method for internal validation.                                                                         | 8-10          |
|                              | 10c  | V              | For validation, describe how the predictions were calculated.                                                                                                                                         | 8-10          |
|                              | 10d  | D;V            | Specify all measures used to assess model performance and, if relevant, to compare multiple models.                                                                                                   | 10            |
|                              | 10e  | V              | Describe any model updating (e.g., recalibration) arising from the validation, if done.                                                                                                               | NA            |
| Risk groups                  | 11   | D;V            | Provide details on how risk groups were created, if done.                                                                                                                                             | NA            |
| Development vs. validation   | 12   | V              | For validation, identify any differences from the development data in setting, eligibility criteria, outcome, and predictors.                                                                         | 6-7           |
| <b>Results</b>               |      |                |                                                                                                                                                                                                       |               |
| Participants                 | 13a  | D;V            | Describe the flow of participants through the study, including the number of participants with and without the outcome and, if applicable, a summary of the follow-up time. A diagram may be helpful. | 11, 15        |
|                              | 13b  | D;V            | Describe the characteristics of the participants (basic demographics, clinical features, available predictors), including the number of participants with missing data for predictors and outcome.    | 11            |
|                              | 13c  | V              | For validation, show a comparison with the development data of the distribution of important variables (demographics, predictors and outcome).                                                        | 15-16         |
| Model development            | 14a  | D              | Specify the number of participants and outcome events in each analysis.                                                                                                                               | 11-14 App 2-3 |
|                              | 14b  | D              | If done, report the unadjusted association between each candidate predictor and outcome.                                                                                                              | NA            |
| Model specification          | 15a  | D              | Present the full prediction model to allow predictions for individuals (i.e., all regression coefficients, and model intercept or baseline survival at a given time point).                           | 11-14 App 2-3 |
|                              | 15b  | D              | Explain how to use the prediction model.                                                                                                                                                              | NA            |
| Model performance            | 16   | D;V            | Report performance measures (with CIs) for the prediction model.                                                                                                                                      | 15-16         |
| Model-updating               | 17   | V              | If done, report the results from any model updating (i.e., model specification, model performance).                                                                                                   | NA            |
| <b>Discussion</b>            |      |                |                                                                                                                                                                                                       |               |
| Limitations                  | 18   | D;V            | Discuss any limitations of the study (such as nonrepresentative sample, few events per predictor, missing data).                                                                                      | 18            |
| Interpretation               | 19a  | V              | For validation, discuss the results with reference to performance in the development data, and any other validation data.                                                                             | 16-17         |
|                              | 19b  | D;V            | Give an overall interpretation of the results, considering objectives, limitations, results from similar studies, and other relevant evidence.                                                        | 16-18 App 4   |
| Implications                 | 20   | D;V            | Discuss the potential clinical use of the model and implications for future research.                                                                                                                 | 18-19         |
| <b>Other information</b>     |      |                |                                                                                                                                                                                                       |               |
| Supplementary information    | 21   | D;V            | Provide information about the availability of supplementary resources, such as study protocol, Web calculator, and data sets.                                                                         | App 1-4       |
| Funding                      | 22   | D;V            | Give the source of funding and the role of the funders for the present study.                                                                                                                         | 19            |

## TRIPOD Checklist: Prediction Model Development and Validation

\*Items relevant only to the development of a prediction model are denoted by D, items relating solely to a validation of a prediction model are denoted by V, and items relating to both are denoted D;V. We recommend using the TRIPOD Checklist in conjunction with the TRIPOD Explanation and Elaboration document.

For peer review only

1  
2  
3  
4  
5  
6  
7  
8  
9  
10  
11  
12  
13  
14  
15  
16  
17  
18  
19  
20  
21  
22  
23  
24  
25  
26  
27  
28  
29  
30  
31  
32  
33  
34  
35  
36  
37  
38  
39  
40  
41  
42  
43  
44  
45  
46  
47  
48  
49  
50  
51  
52  
53  
54  
55  
56  
57  
58  
59  
60

# BMJ Open

**The Dr Foster Global Frailty Score: An international retrospective observational study developing and validating a risk prediction model for hospitalised older persons from administrative datasets.**

|                                 |                                                                                                                                                                                                                                                                                                                                                                                                                                                                                                                                                                                                                                                                                                                                                                                           |
|---------------------------------|-------------------------------------------------------------------------------------------------------------------------------------------------------------------------------------------------------------------------------------------------------------------------------------------------------------------------------------------------------------------------------------------------------------------------------------------------------------------------------------------------------------------------------------------------------------------------------------------------------------------------------------------------------------------------------------------------------------------------------------------------------------------------------------------|
| Journal:                        | <i>BMJ Open</i>                                                                                                                                                                                                                                                                                                                                                                                                                                                                                                                                                                                                                                                                                                                                                                           |
| Manuscript ID                   | bmjopen-2018-026759.R1                                                                                                                                                                                                                                                                                                                                                                                                                                                                                                                                                                                                                                                                                                                                                                    |
| Article Type:                   | Research                                                                                                                                                                                                                                                                                                                                                                                                                                                                                                                                                                                                                                                                                                                                                                                  |
| Date Submitted by the Author:   | 07-Mar-2019                                                                                                                                                                                                                                                                                                                                                                                                                                                                                                                                                                                                                                                                                                                                                                               |
| Complete List of Authors:       | Soong, John; National University Hospital, Medicine; Imperial College London Department of Primary Care and Public Health, Medicine<br>Kaubryte, Jurgita; Dr Foster Ltd<br>Liew, Danny; Monash University, Epidemiology and Preventive Medicine at The Alfred Centre;<br>Peden, Carol; University of Southern California, Keck School of Medicine<br>Bottle, Alex; Imperial College, Primary Care and Social Medicine<br>Bell, Derek; The National Institute for Health Research (NIHR) Collaboration for Leadership in Applied Health Research and Care (CLAHRC) Northwest London; Imperial College London Department of Primary Care and Public Health<br>Cooper, Carolyn; Guy's and Saint Thomas' NHS Foundation Trust<br>Hopper, Adrian; Guy's and Saint Thomas' NHS Foundation Trust |
| <b>Primary Subject Heading</b>: | Geriatric medicine                                                                                                                                                                                                                                                                                                                                                                                                                                                                                                                                                                                                                                                                                                                                                                        |
| Secondary Subject Heading:      | Diagnostics, Global health, Health informatics, Health policy, Health services research                                                                                                                                                                                                                                                                                                                                                                                                                                                                                                                                                                                                                                                                                                   |
| Keywords:                       | Frailty, Secondary Care, Measure, Administrative, Risk Prediction                                                                                                                                                                                                                                                                                                                                                                                                                                                                                                                                                                                                                                                                                                                         |
|                                 |                                                                                                                                                                                                                                                                                                                                                                                                                                                                                                                                                                                                                                                                                                                                                                                           |

SCHOLARONE™  
Manuscripts

1  
2  
3 Title: The Dr Foster Global Frailty Score: An international retrospective observational study  
4 developing and validating a risk prediction model for hospitalised older persons from  
5 administrative datasets.  
6  
7

8 John Tshon Yit Soong<sup>1</sup>, Jurgita Kaubryte<sup>2</sup>, Danny Liew<sup>3</sup>, Carol J. Peden<sup>4</sup>, Alex Bottle<sup>5</sup>, Derek  
9 Bell<sup>6</sup> Carolyn Cooper<sup>7</sup>, Adrian Hopper<sup>7</sup>  
10  
11

12 Corresponding author: John Tshon Yit Soong

13 Address: NUHS Tower Block, 10<sup>th</sup> Floor, Advanced Internal Medicine, 1E Kent Ridge Road,  
14 119228, Singapore  
15

16 Email: [John\\_Soong@nuhs.edu.sg](mailto:John_Soong@nuhs.edu.sg)

17 Telephone number: +6597328267  
18  
19

20  
21  
22 Word Count: 3420  
23

24 Keywords: Frailty, Secondary Care, Measure, Administrative, Risk prediction  
25

26 Authors Affiliations  
27

28 1. National University Hospital, Singapore  
29

30 2. Dr Foster Ltd, London, United Kingdom  
31

32 3. School of Public Health and Preventive Medicine, Monash University, Melbourne,  
33 Australia  
34

35 4. Keck School of Medicine, University of Southern California, Los Angeles, USA.  
36  
37

38 5. School of Public Health, Faculty of Medicine, Imperial College London  
39

40 6. The National Institute for Health Research (NIHR) Collaboration for Leadership in Applied  
41 Health Research and Care (CLAHRC) Northwest London  
42  
43

44 7. Guy's and St Thomas' NHS Foundation Trust  
45  
46  
47  
48  
49  
50  
51  
52  
53  
54  
55  
56  
57  
58  
59  
60

1  
2  
3 Structured abstract 300 words. (300 words)  
4

5 Objectives. This study aimed to examine the prevalence of frailty coding within the Dr Foster  
6 Global Comparators (GC) international database. We then aimed to develop and validate a  
7 risk prediction model, based on frailty syndromes, for key outcomes using the GC dataset.  
8  
9

10  
11 Design. A retrospective cohort analysis of data from patients over 75 years of age from the  
12 GC international administrative data. A risk prediction model was developed from the initial  
13 analysis based on seven frailty syndrome groups and their relationship to outcome metrics.  
14 A weighting was then created for each syndrome group and summated to create the Dr  
15 Foster Global Frailty Score. Performance of the score for predictive capacity was compared  
16 with an established prognostic comorbidity model (Elixhauser) and tested on another  
17 administrative database Hospital Episode Statistics (2011-2015), for external validation.  
18  
19  
20  
21  
22

23  
24  
25 Setting. 34 hospitals from nine countries across Europe, Australia, the UK and USA.  
26

27 Results. Of 6.7 million patient records in the GC database, 1.4 M (20%) were from patients  
28 aged 75 years or more. There was marked variation in coding of frailty syndromes between  
29 countries and hospitals. Frailty syndromes were coded in 2-24% of patient spells. Falls and  
30 fractures was the most common syndrome coded (24%). The Dr Foster Global Frailty Score  
31 was significantly associated with in-hospital mortality, 30-day non-elective readmission and  
32 long length of hospital stay. The score had significant predictive capacity beyond that of  
33 other known predictors of poor outcome in older persons, such as co-morbidity and  
34 chronological age. The score's predictive capacity was higher in the elective group  
35 compared with non-elective, and may reflect improved performance in lower acuity states.  
36  
37  
38  
39  
40  
41

42  
43 Conclusions: Frailty Syndromes can be coded in international secondary care administrative  
44 datasets. The Dr Foster Global Frailty Score significantly predicts key outcomes. This  
45 methodology may be feasibly utilised for case-mix adjustment for older persons  
46 internationally.  
47  
48  
49  
50  
51  
52  
53  
54  
55  
56  
57  
58  
59  
60

1  
2  
3 Article summary – strengths and limitations of this study  
4  
5

- 6 • This study is a large multicentre international study across Europe, Australia and the  
7 United States utilising a routinely collected administrative data with the aim of  
8 providing a simple model for case-mix adjustment for older persons in secondary  
9 care.  
10
- 11 • The dataset used represent whole populations, and there was little missing data.
- 12 • Robust statistical methods were used and the Dr Foster Global Frailty Score was  
13 validated on an external dataset (Hospital Episode Statistics)
- 14 • Our model's predictive capacity is comparable with other recent single country  
15 studies  
16
- 17 • The variability in frequency of coding of frailty syndromes across countries may limit  
18 reliability and generalisability.  
19  
20  
21  
22  
23  
24  
25  
26  
27  
28  
29  
30  
31  
32  
33  
34  
35  
36  
37  
38  
39  
40  
41  
42  
43  
44  
45  
46  
47  
48  
49  
50  
51  
52  
53  
54  
55  
56  
57  
58  
59  
60

## Introduction

Increased population ageing stems from a range of diverse factors, including lower childhood and adult mortality, improved fertility, migration, relative world peace and improved health and social care(1). For many, this phenomenon is associated with good health and quality of life(2). For others, there is increased co-morbidity(3), functional decline(4) and poorer quality of life. Differences in the health and function of individuals as they grow older is not readily explained by chronological age(5). Frailty is common and increasingly prevalent with advancing age and often defined as a decrease in physiological reserve over a life-course. Using this pathophysiological model of frailty several underlying processes have been described, including chronic inflammation(6, 7), sarcopaenia(8), anaemia(9) and coagulopathy, steroid hormone dysregulation(10, 11), low vitamin D levels, malnutrition(12, 13) and insulin resistance(14, 15) underpin frailty. These deficits can accumulate over the course of life-time exposure to environmental stressors. Frailty manifests as a combination of the pathophysiological consequence of inbuilt senescence and the accumulation of defects throughout a life-course. Frailty ultimately results in recognisable clinical manifestations such as recurrent falls and delirium and is associated with increased mortality, disability and high resource utilisation(16). Conceptually and operationally, frailty appears to be related to, but distinct from, disability, co-morbidity and chronological age(17). The importance of contributing environmental factors and the psycho-social impact of frailty are increasingly being recognised(18) as important.

Assessing frailty in the hospital setting is challenging. Many frailty assessment scores tested have poor reliability, require large amounts of data, or specialised equipment and have poor predictive performance(19). Given these limitations, there is increasing interest in utilising routinely collected administrative data for risk prediction modelling for those at risk of frailty, particularly older persons. Risk prediction models estimate the likelihood of developing a specific outcome, or having a specific condition. These models can be utilised for the purposes of case-mix adjustment or risk-stratification. Case-mix risk adjustment allows for more accurate comparison of organisational performance by reducing confounding bias. For example, when considering mortality as an outcome measure for organisations, patient-specific factors such as illness severity influence outcome, and must be taken into account. Risk stratification allows for possible segmentation of a population into different levels of risk for developing a specific outcome. This segmentation can then be used to health system planning or inform targeting of resources.

1  
2  
3 In older persons, risk prediction models often utilise chronological age(20), co-morbidity(21)  
4 and functional dependence(22) as patient-specific factors for risk prediction. In the context of  
5 long-term care (e.g. nursing homes), risk prediction models often utilise functional  
6 dependence as a patient factor, to aid appropriate health resource utilisation and costing  
7 (23-25). A recent English study in the primary care setting derived an electronic frailty index  
8 from patient records with predictive validity for nursing home admission, hospitalisation and  
9 mortality (26). In secondary care, risk prediction models for older persons have utilised  
10 measures of demographics, and co-morbidity in the form of diagnostic (27-30) and  
11 procedural codes(31, 32), as well as prescription data(29, 33). Frailty syndromes are  
12 recognised as clinical manifestations of frailty(34). These common presentations in older  
13 persons include recurrent falls, cognitive impairment, incontinence and pressure ulcers, are  
14 associated with poor outcome. Recent studies have explored the coding of frailty syndromes  
15 within secondary care administrative datasets in the United Kingdom, and its association  
16 with in-hospital mortality, non-elective readmission and functional decline.(35, 36)

17  
18  
19 In this study, we explored the prevalence of coded frailty syndromes within an international  
20 secondary care dataset to develop and validate a risk prediction model based on frailty  
21 syndromes for the outcomes of mortality, non-elective readmission and long length of stay.  
22 We sought to compare the performance of this model with an established prognostic co-  
23 morbidity model for the above outcomes.

## 24 25 26 27 28 29 30 31 32 33 34 35 36 **Methods**

### 37 38 39 **Data Sources**

40  
41 The Global Comparators programme at Dr Foster® was an international hospital  
42 collaborative which ran from 2011-2017, focused on pooling and benchmarking data,  
43 knowledge-sharing networks and health services research to better understand variations in  
44 outcomes and disseminate international best practice. The hospitals within the collaboration  
45 contributed administrative data to be pooled within the Global Comparators dataset, using  
46 established data cleaning processes(37). This provided a rich patient-level dataset  
47 containing demographics, diagnostic codes, procedure codes and outcomes, collected  
48 primarily for administrative purposes, such as operational needs and costing. To develop  
49 and test Dr Foster Global Frailty Score, Global Comparators data were extracted from 34  
50 hospitals in nine countries: Australia, Belgium, Denmark, Finland, Italy, Netherlands,  
51 Norway, United Kingdom and United States.



1  
2  
3 Hospital Episode Statistics (HES) is an English national administrative dataset, housed  
4 within the safe haven of NHS Digital, and contains administrative data from English hospital  
5 trusts, which are cleaned and securely stored. This dataset was used to validate the Dr  
6 Foster Global Frailty Score. We included the 138 English acute non-specialist hospital trusts,  
7 excluding hyper-specialist hospitals (e.g. single pathology quaternary referral units) and  
8 mental health units, which have different case-mix.  
9  
10  
11  
12  
13

#### 14 Study Population

15 Patient records were included in the analysis if they fulfilled the criteria of patient age  $\geq 75$   
16 years and required an elective or non-elective hospital admission of 24 hours or more.  
17 Patient spells were excluded if the age, sex or length of stay was recorded as missing or  
18 invalid, or the admission was planned and the patient discharged home on the same day, or  
19 the admission was unplanned but no procedure was undertaken and the patient went home  
20 after recorded length of stay less than 2 days. This was to exclude records with inadequate  
21 quality data, and patients admitted into observations units or day-case attendances. Overall,  
22 0.17% of data were missing within the derivation dataset.  
23  
24  
25  
26  
27  
28  
29

#### 30 Coding frailty

31 Each patient record corresponded to a spell covering a patient's total length of stay at a  
32 hospital. Within HES, these were aggregated into 'superspells' (admissions), which  
33 encompass the full length of stay for the patient across all hospital trusts before their final  
34 discharge. Seven groups of frailty syndromes were chosen to represent the common  
35 domains used in comprehensive geriatric assessment: Dementia and Delirium, Mobility  
36 Problems, Falls and Fractures, Pressure Ulcers and Weight Loss, Incontinence,  
37 Dependence and Care, as well as Anxiety and Depression were coded within International  
38 Statistical Classification of Diseases, Injuries and Causes of Death (ICD) diagnostic coding  
39 groups, and within all available diagnostic fields. As the Global Comparators dataset  
40 comprised hospitals which utilised different revisions of ICD (revision 9 and 10), equivalent  
41 diagnostic codes for both versions were compiled. These diagnostic coding groups were  
42 modified from previously published work on English national administrative data(35).  
43 Appendix 1 displays the full list of ICD-9 and ICD-10 diagnostic codes utilised to code for the  
44 seven frailty syndrome groups. Trends by calendar year and month, country and frailty  
45 syndrome group were plotted to investigate frequency of coding for the years 2010-2014.  
46 Based on this analysis, years 2012-2013 were selected as having stable coding for  
47 multivariable risk prediction modelling within the derivation dataset.  
48  
49  
50  
51  
52  
53  
54  
55  
56  
57  
58  
59  
60

Table 1: Predictors inputs for frailty risk prediction model (independent predictors)

| Name                          | Time span                            | Description                                                                                                              | Comments                                                                                                                                    |
|-------------------------------|--------------------------------------|--------------------------------------------------------------------------------------------------------------------------|---------------------------------------------------------------------------------------------------------------------------------------------|
| Age                           | Current spell                        | Age on admission                                                                                                         |                                                                                                                                             |
| Gender                        | Current spell                        | Gender on admission                                                                                                      |                                                                                                                                             |
| Country                       | Current Spell                        | Country from which hospital contributed data                                                                             | Nominal; Countries were:<br>Australia<br>Belgium<br>Denmark<br>Finland<br>Italy<br>Netherlands<br>Norway<br>United Kingdom<br>United States |
| Dementia & Delirium           | 12-month historical binary indicator | A binary flag indicating whether a relevant diagnosis has been received during any inpatient spell in the past 12 months | Final Dr Foster Global Frailty Score is weighted (see risk stratification models section for further details)                               |
| Mobility Problems             |                                      |                                                                                                                          |                                                                                                                                             |
| Falls & Fractures             |                                      |                                                                                                                          |                                                                                                                                             |
| Pressure Ulcers & Weight Loss |                                      |                                                                                                                          |                                                                                                                                             |
| Dependence and Care           |                                      |                                                                                                                          |                                                                                                                                             |
| Anxiety & Depression          |                                      |                                                                                                                          |                                                                                                                                             |
| Co-morbidity (Elixhauser)     | 12-month historical score            | A weighted score (see risk stratification                                                                                | Integer                                                                                                                                     |

|                               |                           |                                                                                                 |         |
|-------------------------------|---------------------------|-------------------------------------------------------------------------------------------------|---------|
|                               |                           | models section for further details)                                                             |         |
| Number of previous admissions | 12-month historical count | The number of emergency admission spells in the previous 12 months, excluding the current spell | Integer |

Table 2: Predictor outputs for frailty risk prediction model (dependent variables)

| Name                            | Time span              | Description                                                                                                                                       | Comments                                                  |
|---------------------------------|------------------------|---------------------------------------------------------------------------------------------------------------------------------------------------|-----------------------------------------------------------|
| In-hospital mortality           | Current spell          | Indicates if the discharge method was death                                                                                                       |                                                           |
| 30-day non-elective readmission | 30 days from discharge | Indicates if the patient had an emergency admission with admission date between 1 and 30 days following the discharge date of the index admission | Spells that ended in death are excluded from the analysis |
| Long length of stay             | Current spell          | Upper quartile length of hospital stay for country                                                                                                |                                                           |

## Risk Models

Within the Global Comparators dataset, 30 separate regression models were undertaken, to account for admission status, frailty, Elixhauser co-morbidity and combination of frailty and Elixhauser for the three outcomes above(Figure 1).. The characteristics of predictor and outcome variables included within the models are described in Tables 1 and 2. Elective and non-elective hospital admission populations were modelled separately. A two-step process for each outcome was utilised to model the frailty and comorbidity scores. First, binary logistic regression was utilised to ascertain odds ratios (ORs) for each frailty syndrome group and each outcome, within the population subgroups separately (elective and non-elective). The natural log of OR ( $\ln$  OR) was used to create weights for each frailty syndrome group, using the smallest  $\ln$  OR as reference (weighted 1.0). Secondly, the summation of the weights for each frailty syndrome group was utilised to create a frailty score. The patient-level frailty score was then included within a multivariable logistic regression model, adjusted for age, gender and country, for each outcome. Figure 2 illustrates an example of this two-step process for the outcome of upper quartile length of stay.

The Elixhauser co-morbidity score was calculated for each outcome using previously described methods(38). To provide comparison, the Elixhauser co-morbidity score was then included within a multivariable logistic regression model, adjusting for age, gender and country, for each outcome. Finally, both the Elixhauser co-morbidity and Dr Foster Global Frailty Score were then included within a multivariable logistic regression model, adjusted for age, gender and country, for each outcome. The predicted probabilities from these regression models were utilised to calculate Area under the Receiver Operator Characteristic Curves (AUC) as a measure of predictive capacity for each outcome. This two-step process was repeated for the Dr Foster Global Frailty Score on HES years 2011-2015 for external validation.

## Performance metrics

Multicollinearity between predictor variables was investigated by variance inflation factor (VIF), where VIF scores of over three were taken to denote unacceptable collinearity. The Hosmer-Lemeshow statistic was calculated for each model to ascertain model calibration. The Wald statistic was calculated to explore the explanatory power of the Dr Foster Global Frailty Score, Elixhauser co-morbidity Score, age, country and gender for each of the three outcomes. Statistical analysis was undertaken using the R Statistical Package.

## Patient and Public Involvement

Patients were not involved in this study

## Results

### Descriptive statistics

Of the 6,739,790 spells within the Global Comparators Database from 2010-2014, 1,366,187 (20%) involved patients aged  $\geq 75$  years. There was variation in frequency of coding of frailty syndromes across the countries. The four countries with most volume of coded frailty syndromes were Australia, Belgium, the United Kingdom and the United States. Figure 3a & 3b describes the percentage of spells of patients  $\geq 75$  years to total volume by country and year within the database, and the frequency of coding for frailty syndromes by country for the year 2013.

### Coded Frailty Syndromes

Frailty syndromes were coded in 2-24% of patient spells among patients aged  $\geq 75$  years from 2010-2014 within the Global Comparators database: Falls and Fractures N=326,528 (24%); Dementia and Delirium N=215,629 (16%); Anxiety and Depression N=87,732 (6%); Pressure Ulcers and Weight Loss N=66,208 (5%); Incontinence N=50,277 (4%); Mobility Problems N=39,479 (3%); and Dependence and Care N=28,294 (2%). At least one frailty syndrome was present in 538,766 (39%) of spells.

### Derivation Cohort

Of the 294,998 patient spells from 2012-2013 for those aged  $\geq 75$  years used in the predictive models within the derivation cohort from the Global Comparators Dataset, 221 441 (75%) were non-elective admissions and 158 595 were female (54%). Patient spells that ended with inpatient mortality (42,354, 14%) of were excluded from the predictive models exploring non-elective readmission.

### Dr Foster Global Frailty Score

Negative scores were set to 0 and positive scores were not capped. The Dr Foster Global Frailty Score varied based on outcome and population (elective and non-elective), and remained significant after multivariable adjustment. Table 3 summarises the ORs of the Dr Foster Global Frailty Score and Elixhauser Co-morbidity Score after multivariable adjustment for age, gender and country for the outcomes of in-hospital mortality, 30-day non-elective readmission and upper quartile length of stay (for country), by elective and non-elective

population groups. Appendix 2 displays full multivariable adjustment of the Dr Foster Global Frailty Score.

Table 3: Odds ratios for Elixhauser and Dr Foster Global Frailty Score after multivariable adjustment for age, gender and country

|                                | <b>Outcome</b>                              | <b>Score range</b> | <b>Population</b> | <b>Odds Ratio</b> | <b>Lower CI</b> | <b>Upper CI</b> | <b>P-value</b> |
|--------------------------------|---------------------------------------------|--------------------|-------------------|-------------------|-----------------|-----------------|----------------|
| Dr Foster Global Frailty Score | In-hospital mortality                       | 0-11               | Elective          | 1.277             | 1.247           | 1.308           | <0.001         |
|                                |                                             | 0-13               | Non-elective      | 1.109             | 1.103           | 1.116           | <0.001         |
|                                | 30-day non-elective readmission             | 0-6                | Elective          | 1.106             | 1.060           | 1.154           | <0.001         |
|                                |                                             | 0-4                | Non-elective      | 1.056             | 1.031           | 1.082           | <0.001         |
|                                | Upper Quartile Length of Stay (for country) | 0-16               | Elective          | 1.365             | 1.347           | 1.382           | <0.001         |
|                                |                                             | 0-17               | Non-elective      | 1.199             | 1.194           | 1.205           | <0.001         |

|                               |                                             |  |              |       |       |       |        |
|-------------------------------|---------------------------------------------|--|--------------|-------|-------|-------|--------|
| Elixhauser co-morbidity score | In-hospital mortality                       |  | Elective     | 1.309 | 1.290 | 1.329 | <0.001 |
|                               |                                             |  | Non-elective | 1.130 | 1.126 | 1.133 | <0.001 |
|                               | 30-day non-elective readmission             |  | Elective     | 1.144 | 1.130 | 1.158 | <0.001 |
|                               |                                             |  | Non-elective | 1.045 | 1.042 | 1.048 | <0.001 |
|                               | Upper quartile length of stay (for country) |  | Elective     | 1.101 | 1.097 | 1.105 | <0.001 |
|                               |                                             |  | Non-elective | 1.069 | 1.068 | 1.071 | <0.001 |

When both the Dr Foster Global Frailty Score and Elixhauser co-morbidity Score were included in multivariable risk adjustment models for age, gender and country, the Dr Foster Global Frailty Score remained significant for the outcomes of in-hospital mortality and upper quartile length of stay, but not for 30-day non-elective readmission (Table 4).

Table 4: Odds ratios for Elixhauser and Dr Foster Global Frailty Score after multivariable adjustment for age, gender and country with both scores in model

| Outcome                         | Population   | Score              | Odds Ratio | Lower CI | Upper CI | P-value |
|---------------------------------|--------------|--------------------|------------|----------|----------|---------|
| In-hospital mortality           | Elective     | Elixhauser         | 1.283      | 1.263    | 1.304    | <0.001  |
|                                 |              | Frailty            | 1.114      | 1.085    | 1.144    | <0.001  |
|                                 | Non-elective | Elixhauser         | 1.123      | 1.119    | 1.126    | <0.001  |
|                                 |              | Frailty            | 1.058      | 1.052    | 1.065    | <0.001  |
| 30-day non-elective readmission | Elective     | Admission History* | 1.273      | 1.234    | 1.314    | <0.001  |
|                                 |              | Elixhauser         | 1.142      | 1.128    | 1.157    | <0.001  |
|                                 |              | Frailty            | 1.032      | 0.988    | 1.077    | 0.160   |
|                                 | Non-elective | Admission History* | 1.240      | 1.228    | 1.252    | <0.001  |
|                                 |              | Elixhauser         | 1.045      | 1.042    | 1.048    | <0.001  |
|                                 |              | Frailty            | 1.024      | 1.000    | 1.049    | 0.052   |
| Upper quartile length of stay   | Elective     | Elixhauser         | 1.081      | 1.077    | 1.085    | <0.001  |
|                                 |              | Frailty            | 1.243      | 1.227    | 1.260    | <0.001  |
|                                 | Non-elective | Elixhauser         | 1.055      | 1.053    | 1.056    | <0.001  |
|                                 |              | Frailty            | 1.137      | 1.131    | 1.142    | <0.001  |

\*Admission history included in multivariable model exploring 30-day non-elective readmission

The predictive capacity of the Dr Foster Global Frailty Score and Elixhauser co-morbidity score are compared in Table 5. When the Dr Foster Global Frailty Score and Elixhauser co-morbidity score are both included in a multivariable model adjusted for age, gender and country, the predictive capacity is moderate to good. The predictive capacity of the Elixhauser co-morbidity score generally exceeds that of the Dr Foster Global Frailty Score for all three outcomes.

Table 5: Area under the Receiver Operator Statistic Curve for outcomes by Elixhauser score, Dr Foster Global Frailty Score and population within Global Comparators dataset

| Global Comparators Dataset       | Elixhauser |              | Dr Foster Global Frailty Score |              | Elixhauser and Dr Foster Global Frailty Score |              |
|----------------------------------|------------|--------------|--------------------------------|--------------|-----------------------------------------------|--------------|
|                                  | Elective   | Non-elective | Elective                       | Non-elective | Elective                                      | Non-elective |
| In-hospital mortality            | 0.80       | 0.69         | 0.70                           | 0.62         | 0.81                                          | 0.69         |
| 30-day non-elective readmission* | 0.67       | 0.64         | 0.64                           | 0.63         | 0.67                                          | 0.64         |
| Upper quartile length of stay    | 0.72       | 0.63         | 0.69                           | 0.61         | 0.73                                          | 0.65         |

\*Admission history included in multivariable model exploring 30-day non-elective readmission

The Wald statistic for independent variables included in final models by population and outcome are displayed in Table 6. Overall, the explanatory power of the Elixhauser co-morbidity score exceeds the Dr Foster Global Frailty Score for all three outcomes.

Table 6: Wald Statistic for independent variables of final models by outcome and population

|                                | Upper quartile length of stay |              | 30-day non-elective readmission |              | In-hospital mortality |              |
|--------------------------------|-------------------------------|--------------|---------------------------------|--------------|-----------------------|--------------|
|                                | Elective                      | Non-elective | Elective                        | Non-elective | Elective              | Non-elective |
| Age                            | 31.1                          | 31.4         | 0.0                             | 0.4          | 46.4                  | 747.2        |
| Sex                            | 18.7                          | 0.2          | 6.9                             | 77.6         | 9.5                   | 85.2         |
| Country                        | 162.0                         | 244.2        | 31.1                            | 102.1        | 12.8                  | 137.8        |
| Admission History              | -                             | -            | 225.9                           | 1888.4       | -                     | -            |
| Dr Foster Global Frailty Score | 1020.7                        | 2579.9       | 2.0                             | 3.8          | 62.7                  | 318.2        |
| Elixhauser Score               | 1727.5                        | 4075.1       | 420.4                           | 848.4        | 973.9                 | 4842.1       |



### Performance metrics

All our models displayed significance at  $p < 0.05$  for the Hosmer-Lemeshow tests for goodness-of-fit test. These findings have been similarly described by others who have produced models on large data sets as the test is recognised to detect unimportant differences(38, 39). None of the predictor variables demonstrated unacceptable collinearity(40).

### Validation Cohort

Of the 7,195,950 patient spells from 2011-2015 used in the predictive models within the validation cohort from English national Hospital Episode Statistics data, 6,128,811 (85%) were non-elective admissions, and 564,182 (7.8%) patient spells ending with in-hospital mortality were excluded from predictive models exploring non-elective readmission.

The Dr Foster Global Frailty Score remained significant after multivariable adjustment within the validation dataset. However, the predictive capacity and ORs were generally lower across all three outcomes compared to the derivation cohort. Table 7 summarises the ORs and AUC of the Dr Foster Global Frailty Score after multivariable adjustment for age, gender and calendar year for the outcomes of in-hospital mortality, 30-day non-elective readmission and upper quartile length of stay (for country), by elective and non-elective population groups. Appendix 3 displays full multivariable adjustment of the Dr Foster Global Frailty Score within the validation dataset.

Table 7: Odds ratios and for Area under the Receiver Operator Statistic Curve (AUC) for Global Frailty Score following multivariable adjustment for age, gender, calendar year by population subgroup and outcome

| Outcome                                     | Population   | AUC   | Odds Ratio | Lower CI | Upper CI | P-value |
|---------------------------------------------|--------------|-------|------------|----------|----------|---------|
| In-hospital mortality                       | Elective     | 0.649 | 1.173      | 1.171    | 1.174    | <0.001  |
|                                             | Non-elective | 0.655 | 1.108      | 1.107    | 1.109    | <0.001  |
| 30-day non-elective readmission             | Elective     | 0.630 | 1.045      | 1.044    | 1.047    | <0.001  |
|                                             | Non-elective | 0.630 | 1.030      | 1.030    | 1.031    | <0.001  |
| Upper Quartile Length of Stay (for country) | Elective     | 0.676 | 1.193      | 1.192    | 1.193    | <0.001  |
|                                             | Non-elective | 0.677 | 1.055      | 1.055    | 1.055    | <0.001  |

\*Admission history included in multivariable model exploring 30-day non-elective readmission

## Discussion

Our study found that frailty syndromes are coded with variable frequency within a large (N≈1.3m) international dataset of hospitalised older persons (aged over 75 years) utilising readily available administrative data, with Falls & Fractures and Dementia & Delirium being the most frequently coded syndromes. This is consistent with a previous study using English administrative data(36). The Dr Foster Global Frailty Score was derived from these coded syndromes within this dataset, and further validated on an English national secondary care dataset (N≈7.2m). The score was significantly associated with in-hospital mortality, 30-day non-elective readmission and long length of hospital stay. The score's predictive capacity was generally higher in the elective group compared with the non-elective, and may reflect improved performance in lower acuity states.

The ORs and predictive capacity in the validation cohort were generally lower than the derivation cohort, but are in keeping with other risk prediction models for older persons within the English secondary care administrative data(35, 41). There was marked variation in volume and frequency of coding for frailty syndromes across participating countries (Figure

1  
2  
3 2). These differences may reflect different coding practices and contrasting healthcare  
4 systems. These differences may contribute to poorer performance within the validation  
5 cohort. Nevertheless, within pooled data across all participating sites, the Dr Foster Global  
6 Frailty Score appears to significantly predict in-hospital mortality and upper quartile length of  
7 stay (for country) after multivariable adjustment for age, gender, country and co-morbidity.  
8  
9

10  
11  
12 When both the Elixhauser co-morbidity score and Dr Foster Global Frailty Score were  
13 included within multivariable adjustment, both scores remain statistically significant for the  
14 outcomes of in-hospital mortality and upper quartile length of stay, suggesting they are not  
15 collinear.  
16  
17  
18

19  
20 Although the setting for the validation cohort was sourced only from English data, it was a  
21 large dataset (N=~7m spells). After multivariable adjustment for age, gender and year, the  
22 Dr Foster Global Frailty Score remained significant for all three outcomes. Predictive power  
23 was demonstrated to be similar to a previous study(35), and comparable to the derivation  
24 cohort (Table 5).  
25  
26  
27

28  
29 In clinical practice, risk stratification in older persons for the secondary care setting often  
30 utilise demographics (including chronological age), physiological based track-and-trigger  
31 systems (e.g. National Early Warning Score(42)), biomarkers (e.g. troponin) and  
32 understanding about the prognosis of specific disease states(e.g. co-morbidity). When  
33 adjusting for case-mix between systems or at organisational level, registry(43) or  
34 administrative(28) data are often employed, as large scale high quality data from patient  
35 records are not readily available. Consequently, risk prediction models using administrative  
36 data have sought to differentiate risk by using diagnostic(27-30), procedural(31, 32) and  
37 more recently, prescribing codes(29, 33).  
38  
39  
40  
41  
42  
43  
44

45  
46 There are several risk models in the United States utilising frailty-specific groups of  
47 diagnostic codes within Medicare administrative data, Medicare Current Beneficiary Survey  
48 (MCBS) data and Veteran's Affairs (VA) administrative data. Examples of these risk  
49 prediction models include Johns Hopkins Adjusted Clinical Groups (ACG, Johns Hopkins  
50 University) frailty-defining diagnoses indicator(28) and High-Risk Diagnosis for the Elderly  
51 Scale(30). In the UK, studies exploring case-mix adjustment for older persons using  
52 administrative data have utilised HES as a data source, with diagnostic groups for  
53 multimorbidity(38) and complexity(44), as well as frailty(35, 41) being tested in the literature.  
54 Appendix 4 summarises the characteristics, setting, data sources, predictor and outcome  
55 variables and performance of recent case-mix studies for older persons utilising  
56  
57  
58  
59  
60

1  
2  
3 administrative data. Where predictive capacity is known, the Dr Foster Global Frailty Score  
4 performs comparably if not favourably.  
5  
6  
7

8 Our study benefits from being a large multicentre international study across Europe,  
9 Australia and the United States that utilised routinely collected administrative data with the  
10 aim of case-mix adjustment for older persons in secondary care. The datasets represent  
11 whole populations, and there was little missing data. Our study employed robust statistical  
12 methods and included validation of the Dr Foster Global Frailty Score on an external dataset.  
13 It expands the diagnostic coding, provides external validation for a previous UK study(35)  
14 and extends it to include elective patients. The approach of targeting frailty syndromes for  
15 hospitalised patients has support in existing literature(45), and in keeping with national  
16 standards bodies recommendations in the UK(34, 46, 47). Additionally, our model's  
17 predictive capacity is not improved on by a recent UK study(41), and its predictive capacity is  
18 arguably more uniform across the three outcomes. However, we note that our model's  
19 predictive powers are not suitable for clinical risk prediction at the patient's bedside (AUC  
20 >0.80). Further investigation of appropriate cut-points based on desired model sensitivity  
21 and specificity for the above outcomes depending on how the model is used (e.g. health  
22 resource planning) represents future work.  
23  
24  
25  
26  
27  
28  
29  
30  
31  
32

33 However, some limitations warrant mention. The variability in frequency of coding of frailty  
34 syndromes across countries may limit reliability and generalisability, although the country of  
35 origin was accounted for in the multivariable regression. Further subgroup analysis in  
36 countries with similar frequency of coding, or hierarchical regression to account for clusters,  
37 may be the next step. The hospitals that contributed data to the Global Comparators dataset  
38 were mainly large academic centres with reputations of clinical excellence. As such, the  
39 quality of coding and patient outcomes represented may not be representative of other  
40 institutions. The score was developed on hospitalised populations of age  $\geq 75$  years as the  
41 majority of frail older persons fall within this age-group, particularly in Western Europe. This  
42 score is therefore not validated in those who fall below 75 years of age. Additionally, the  
43 study focused on hospitalised patients of  $\geq 24$  hours to exclude patients admitted to  
44 observational units, for investigations or procedures. There is increasing acceptance for the  
45 acute medical management of older persons in an ambulatory setting. This methodology will  
46 exclude same-day discharges, limiting generalisability.  
47  
48  
49  
50  
51  
52  
53  
54  
55  
56

57 The accuracy of coding in administrative data has been challenged, and sampling of local  
58 clinical units was not feasible. The Dr Foster Global Frailty Score was based on diagnostic  
59 codes and thus did not fully encompass all dimensions of frailty such as functional and  
60

1  
2  
3 socio-environmental measures as these are not well coded in the administrative data at this  
4 time. Future work linking the datasets to pharmacy, social care, primary care and registry  
5 data may provide for a richer comprehensive case-mix adjustment. A small proportion of the  
6 validation cohort may have been duplicated from the derivation cohort (eight hospitals in  
7 calendar year 2013). However, using national data from several calendar years minimises  
8 the effect of this overlap. Lastly, We have not demonstrated population segmentation  
9 utilising the Dr Foster Global Frailty Score to show separation of risk for the three outcomes  
10 above, and this represents future work.  
11  
12  
13  
14  
15  
16

17  
18 Our study adds to the existing literature regarding the secondary use of administrative data  
19 for case-mix adjustment in general, and for hospitalised older persons in particular. It links  
20 the clinically valid concept of frailty syndromes to a reproducible method of measurement  
21 within administrative datasets. The Dr Foster Global Frailty Score may potentially be used to  
22 routinely identify older persons at risk of adverse outcomes for the purposes of targeted  
23 resource allocation, commissioning or service development. It may form the basis of a global  
24 comparator of risk adjustment for older persons.  
25  
26  
27  
28  
29

### 30 **Conclusion**

31 Frailty Syndromes can be feasibly coded in international secondary care administrative  
32 datasets. The Dr Foster Global Frailty Score based on coded frailty syndromes significantly  
33 predicts in-hospital mortality and upper quartile length of stay in international datasets, and  
34 additionally 30-day non-elective readmission in England's national hospital dataset. This  
35 methodology may be feasibly utilised for case-mix adjustment for older persons across the  
36 international setting.  
37  
38  
39  
40  
41  
42

### 43 **Figures Legend**

44  
45 Figure 1: Summary of 30 risk prediction models undertaken, accounting for admission  
46 status, frailty and co-morbidity

47  
48 Figure 2: Example of 2-step multivariable logistic regression process for the outcome of  
49 upper quartile length of stay.

50  
51 Figure 3a: Percentage Volume of patients aged  $\geq 75$  year to total volume by country and  
52 year within Global Comparators Dataset

53  
54 Figure 3b: Frequency of coding for frailty syndromes by country for year 2013 within Global  
55 Comparators Dataset (colour scale by country) in patients aged  $\geq 75$  years  
56  
57  
58  
59  
60

### **Funding statement**

This research received no specific grant from any funding agency in the public, commercial or not-for-profit sectors

### **Competing interest statement**

CP has shares in Fidelity Health, has been a consultant for Merck and the Institute for Healthcare Improvement.

### **Ethics approval**

Data sharing agreements with all individual hospitals included were in place in order to receive the data. The data used in this study was collected for administrative purposes and anonymized. As per Governance Arrangements for Research Ethics Committees (GAfREC), research limited to secondary use of information previously collected in the course of normal care (without an intention to use it for research at the time of collection), provided that the patients or service users are not identifiable to the research team in carrying out the research.

### **Authors contribution**

JTYS conceived study, designed analysis, interpreted results and wrote first draft. AH conceived study, designed analysis, interpreted results. JK, DL, CP and CC designed analysis, interpreted results and contributed to ongoing writing. AB and DB interpreted results and contributed to ongoing writing.

### **Data Sharing**

The data used for this study was available due to data sharing agreements signed with the individual hospitals as part of their participation in the Global Comparators programme managed by Dr Foster. The Global Comparators programme no longer exists and therefore data sharing agreements are no longer in place to allow for supplementary data sharing.

### **Acknowledgements**

No further acknowledgment

## References

1. World Population Ageing. United Nations, Department of Economic and Social Affairs, Population Division; 2013.
2. Survey of public attitudes and behaviours towards the environment. Department for Environment, Food and Rural Affairs (Defra); 2011.
3. Marengoni A, Angleman S, Melis R, Mangialasche F, Karp A, Garmen A, et al. Aging with multimorbidity: a systematic review of the literature. *Ageing Res Rev.* 2011;10(4):430-9.
4. Family Resources Survey. Department for Work & Pensions; 2014/2015.
5. Lacas A, Rockwood K. Frailty in primary care: a review of its conceptualization and implications for practice. *BMC Medicine.* 2012;10(1):4.
6. Maggio M, Guralnik J, Longo D, Ferrucci L. Interleukin-6 in aging and chronic disease: a magnificent pathway. *J Gerontol A Biol Sci Med Sci.* 2006;61(6):575-84.
7. Bruunsgaard H, Bjerregaard E, Schroll M, Pedersen B. Muscle Strength After Resistance Training Is Inversely Correlated with Baseline Levels of Soluble Tumor Necrosis Factor Receptors in the Oldest Old. *Journal of the American Geriatrics Society.* 52(2):237-41.
8. Cesari M, Leeuwenburgh C, Lauretani F, Onder G, Bandinelli S, Maraldi C, et al. Frailty syndrome and skeletal muscle: results from the Invecchiare in Chianti study. *Am J Clin Nutr.* 2006;83(5):1142-8.
9. Roy CN. Anemia in Frailty. *Clin Geriatr Med.* 2011;27(1):67-78.
10. Baylis D, Bartlett DB, Syddall HE, Ntani G, Gale CR, Cooper C, et al. Immune-endocrine biomarkers as predictors of frailty and mortality: a 10-year longitudinal study in community-dwelling older people. *Age (Dordr).* 2012.
11. Varadhan R, Walston J, Cappola AR, Carlson MC, Wand GS, Fried LP. Higher levels and blunted diurnal variation of cortisol in frail older women. *J Gerontol A Biol Sci Med Sci.* 2008;63(2):190-5.
12. Kaiser M, Bandinelli S, Lunenfeld B. Frailty and the role of nutrition in older people. A review of the current literature. *Acta Biomed.* 2010;81 Suppl 1:37-45.
13. Hubbard RE, Lang IA, Llewellyn DJ, Rockwood K. Frailty, body mass index, and abdominal obesity in older people. *J Gerontol A Biol Sci Med Sci.* 2010;65(4):377-81.
14. Fulop T, Larbi A, Witkowski J, McElhaney J, Loeb M, Mitnitski A, et al. Aging, frailty and age-related diseases. *Biogerontology.* 2010;11(5):547-63.
15. Abbatecola AM, Paolisso G. Is there a relationship between insulin resistance and frailty syndrome? *Curr Pharm Des.* 2008;14(4):405-10.
16. Xue Q-L. The Frailty Syndrome: Definition and Natural History. *Clinics in Geriatric Medicine.* 27(1):1-15.
17. Fried LP, Ferrucci L, Darer J, Williamson JD, Anderson G. Untangling the concepts of disability, frailty, and comorbidity: implications for improved targeting and care. *J Gerontol A Biol Sci Med Sci.* 2004;59(3):255-63.
18. Yu R, Wu W-C, Leung J, Hu SC, Woo J. Frailty and Its Contributory Factors in Older Adults: A Comparison of Two Asian Regions (Hong Kong and Taiwan). *International Journal of Environmental Research and Public Health.* 2017;14(10):1096.
19. Hogan DB, Maxwell CJ, Afilalo J, Arora RC, Bagshaw SM, Basran J, et al. A Scoping Review of Frailty and Acute Care in Middle-Aged and Older Individuals with Recommendations for Future Research. *Canadian Geriatrics Journal.* 2017;20(1):22-37.
20. Lunney JR, Lynn J, Hogan C. Profiles of Older Medicare Decedents. *Journal of the American Geriatrics Society.* 2002;50(6):1108-12.
21. Sharabiani MT, Aylin P, Bottle A. Systematic review of comorbidity indices for administrative data. *Med Care.* 2012;50(12):1109-18.
22. Eilertsen TB, Kramer AM, Schlenker RE, Hrinkevich CA. Application of functional independence measure-function related groups and resource utilization groups-version III systems across post acute settings. *Med Care.* 1998;36(5):695-705.



23. Carpenter GI, Turner GF, Fowler RW. Casemix for inpatient care of elderly people: rehabilitation and post-acute care. *Casemix for the Elderly Inpatient Working Group. Age and Ageing.* 1997;26(2):123-31.
24. Eilertsen T, Kramer A, Schlenker R, Hrinkevich C. Application of Functional Independence Measure-Function Related Groups and Resource Utilization Groups-Version III Systems Across Post Acute Settings. *Med Care.* 1998;36(5):695-705.
25. Poss J, Hirdes J, Fries B, McKillop I, Chase M. Validation of Resource Utilization Groups Version III for Home Care (RUG-III/HC): Evidence From a Canadian Home Care Jurisdiction. *Med Care.* 2008;46(4):380-7.
26. Clegg A, Bates C, Young J, Ryan R, Nichols L, Ann Teale E, et al. Development and validation of an electronic frailty index using routine primary care electronic health record data. *Age Ageing.* 2016;45(3):353-60.
27. Bottle A, Aylin P, Bell D. Effect of the readmission primary diagnosis and time interval in heart failure patients: analysis of English administrative data. *European Journal of Heart Failure.* 2014;16(8):846-53.
28. McIsaac DI, Bryson GL, van Walraven C. Association of frailty and 1-year postoperative mortality following major elective noncardiac surgery: A population-based cohort study. *JAMA Surgery.* 2016;151(6):538-45.
29. Sternberg SA, Bentur N, Abrams C, Spalter T, Karpati T, Lemberger J, et al. Identifying frail older people using predictive modeling. *Am J Manag Care.* 2012;18(10):e392-7.
30. Desai Mayur M, Bogardus Sidney T, Williams Christianna S, Vitagliano G, Inouye Sharon K. Development and Validation of a Risk-Adjustment Index for Older Patients: The High-Risk Diagnoses for the Elderly Scale. *Journal of the American Geriatrics Society.* 2002;50(3):474-81.
31. Faurot KR, Funk MJ, Pate V, Brookhart MA, Patrick A, Hanson LC, et al. Using Claims Data to Predict Dependency in Activities of Daily Living as a Proxy for Frailty. *Pharmacoepidemiology and drug safety.* 2015;24(1):59-66.
32. Davidoff AJ, Hurria A, Zuckerman IH, Lichtman SM, Pandya N, Hussain A, et al. A Novel Approach to Improve Health Status Measurement in Observational Claims-based Studies of Cancer Treatment and Outcomes. *Journal of geriatric oncology.* 2013;4(2):157-65.
33. Dubois M-F, Dubuc N, Kröger E, Girard R, Hébert R. Assessing comorbidity in older adults using prescription claims data. *Journal of Pharmaceutical Health Services Research.* 2010;1(4):157-65.
34. *Acute Care Toolkit 3: Acute medical care for frail older people.* London: Royal College of Physicians; 2012.
35. Soong J, Poots A, Scott S, Donald K, Bell D. Developing and validating a risk prediction model for acute care based on frailty syndromes. *BMJ Open.* 2015;5(10):e008457.
36. Soong J, Poots AJ, Scott S, Donald K, Woodcock T, Lovett D, et al. Quantifying the prevalence of frailty in English hospitals. *BMJ Open.* 2015;5(10):e008456.
37. Bottle A, Middleton S, Kalkman Cor J, Livingston Edward H, Aylin P. Global Comparators Project: International Comparison of Hospital Outcomes Using Administrative Data. *Health Services Research.* 2013;48(6pt1):2081-100.
38. Bottle A, Aylin P. Comorbidity scores for administrative data benefited from adaptation to local coding and diagnostic practices. *J Clin Epidemiol.* 2011;64(12):1426-33.
39. Hosmer DW, Hosmer T, Le Cessie S, Lemeshow S. A comparison of goodness-of-fit tests for the logistic regression model. *Stat Med.* 1997;16(9):965-80.
40. Fox J, Monette G. Generalized Collinearity Diagnostics. *Journal of the American Statistical Association.* 1992;87(417):178-83.
41. Gilbert T, Neuburger J, Kraindler J, Keeble E, Smith P, Ariti C, et al. Development and validation of a Hospital Frailty Risk Score focusing on older people in acute care settings using electronic hospital records: an observational study. *The Lancet.* 2018;391(10132):1775-82.



- 1
- 2
- 3
- 4 42. Prytherch DR, Smith GB, Schmidt PE, Featherstone PI. ViEWS--Towards a national early
- 5 warning score for detecting adult inpatient deterioration. *Resuscitation*. 2010;81(8):932-7.
- 6 43. Rudd AG, Lowe D, Hoffman A, Irwin P, Pearson M. Secondary prevention for stroke in the
- 7 United Kingdom: results from the National Sentinel Audit of Stroke. *Age and ageing*. 2004;33(3):280-
- 8 6.
- 9 44. Ruiz M, Bottle A, Long S, Aylin P. Multi-Morbidity in Hospitalised Older Patients: Who Are the
- 10 Complex Elderly? . *PLoS ONE*. 2015;10(12).
- 11 45. Soong JTY, Poots AJ, Bell D. Finding consensus on frailty assessment in acute care through
- 12 Delphi method. *BMJ Open*. 2016;6(10):e012904.
- 13 46. Banerjee J, Conroy S, Cooke MW. Quality care for older people with urgent and emergency
- 14 care needs in UK. *Emerg Med J*. 2013.
- 15 47. Turner G. *Recognising Frailty*. British Geriatric Society; 2014.
- 16
- 17
- 18
- 19
- 20
- 21
- 22
- 23
- 24
- 25
- 26
- 27
- 28
- 29
- 30
- 31
- 32
- 33
- 34
- 35
- 36
- 37
- 38
- 39
- 40
- 41
- 42
- 43
- 44
- 45
- 46
- 47
- 48
- 49
- 50
- 51
- 52
- 53
- 54
- 55
- 56
- 57
- 58
- 59
- 60

For peer review only

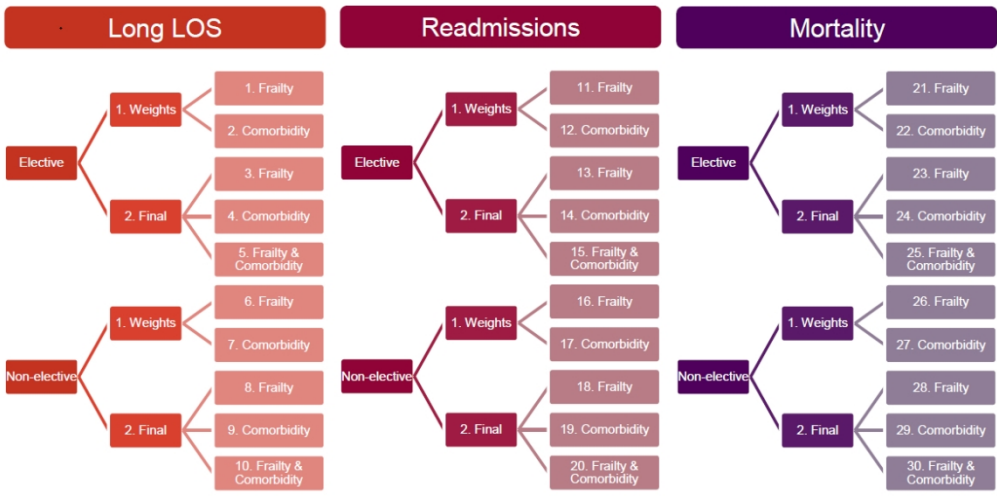

Figure 1: Summary of 30 risk prediction models undertaken, accounting for admission status, frailty and co-morbidity

99x50mm (300 x 300 DPI)

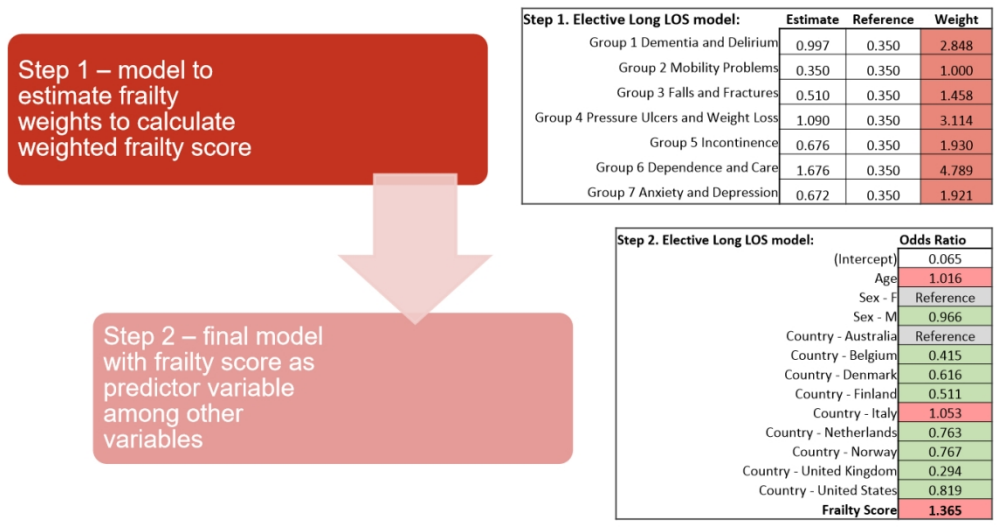

Figure 2: Example of 2-step multivariable logistic regression process for the outcome of upper quartile length of stay.

115x60mm (300 x 300 DPI)

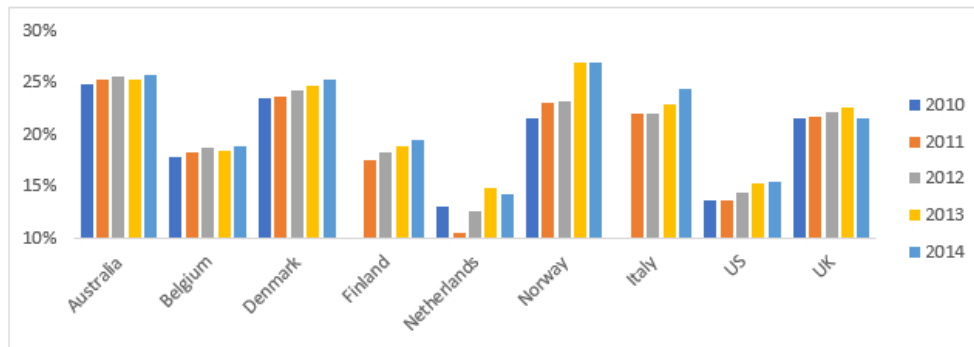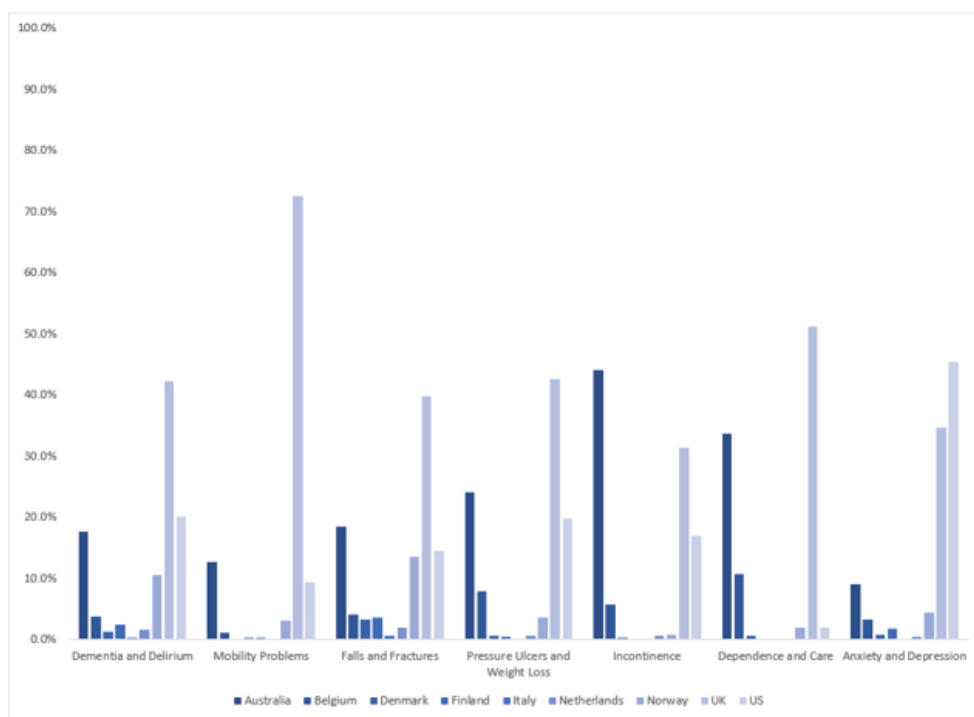

Figure 3a: Percentage Volume of patients aged ≥ 75 year to total volume by country and year within Global Comparators Dataset

Figure 3b: Frequency of coding for frailty syndromes by country for year 2013 within Global Comparators Dataset (colour scale by country) in patients aged ≥ 75 years

54x60mm (300 x 300 DPI)

## Appendix 1 ICD-10 and ICD-9 coding for frailty syndromes

| Group                           | ICD-10                      | Description (ICD-10)                                                                         | ICD-9                              | Description (ICD-9)                                                               |
|---------------------------------|-----------------------------|----------------------------------------------------------------------------------------------|------------------------------------|-----------------------------------------------------------------------------------|
| <b>1. Dementia and Delirium</b> | F00                         | Dementia in Alzheimer's disease                                                              | 2904                               | Arteriosclerotic dementia                                                         |
|                                 | F01                         | Vascular dementia                                                                            | 2941-2942                          | Dementia in other diseases and unspecified dementia                               |
|                                 | F02                         | Dementia in other diseases classified elsewhere                                              | 2930-2931                          | Subacute delirium and delirium due to conditions classified elsewhere             |
|                                 | F03                         | Unspecified dementia                                                                         | V4031                              | Wandering in diseases classified elsewhere                                        |
|                                 | F05                         | Delirium not induced by alcohol and other psychoactive                                       | 3310                               | Alzheimer's disease                                                               |
|                                 | G30                         | Alzheimer's disease                                                                          | 3312                               | Senile degeneration of brain                                                      |
|                                 | G31<br>1                    | Senile degeneration of brain, not elsewhere classified                                       | 2900-2903                          | Senile and presenile dementia, dementia with delirium                             |
|                                 | G31<br>0                    | Circumscribed brain atrophy                                                                  | 33119                              | Other frontotemporal dementia                                                     |
|                                 | F04                         | Organic amnesic syndrome, not induced by alcohol and other psychoactive substances           | 33182                              | Dementia with lewy bodies                                                         |
|                                 | R41                         | Other symptoms and signs involving cognitive functions and awareness                         | 2908-2909                          | Other senile psychotic conditions                                                 |
|                                 |                             |                                                                                              | 2948-2949                          | Other persistent mental disorders due to conditions classified elsewhere          |
|                                 |                             |                                                                                              | 2940                               | Amnesic disorder in conditions classified elsewhere                               |
|                                 | <b>2. Mobility Problems</b> | R26                                                                                          | Abnormalities of gait and mobility | 7812                                                                              |
| R29<br>8                        |                             | Other and unspecified symptoms and signs involving the nervous and musculoskeletal systems   | 78199                              | Other symptoms involving nervous and musculoskeletal systems                      |
| <b>3. Falls and Fractures</b>   | S32                         | Fracture of lumbar spine and pelvis                                                          | 8054-8055                          | Fracture of lumbar vertebra without mention of spinal cord injury                 |
|                                 | S33                         | Dislocation, sprain and strain of joints and ligaments of lumbar spine and pelvis            | 8064-8065                          | Fracture of lumbar spine with spinal cord injury                                  |
|                                 | S42                         | Fracture of shoulder and upper arm                                                           | 8056-8057                          | Fracture of sacrum and coccyx without mention of spinal cord injury               |
|                                 | S43                         | Dislocation, sprain and strain of joints and ligaments of shoulder girdle                    | 8066-8067                          | Fracture of sacrum & coccyx with spinal cord injury                               |
|                                 | S52                         | Fracture of forearm                                                                          | 808-809                            | Fracture of pelvis and ill-defined fractures of bones of trunk                    |
|                                 | S53                         | Dislocation, sprain and strain of joints and ligaments of elbow                              | 8392-8393                          | Dislocation, thoracic & lumbar vertebra                                           |
|                                 | S62                         | Fracture at wrist and hand level                                                             | 83941-83952                        | Dislocation, coccyx and sacrum                                                    |
|                                 | S63                         | Dislocation, sprain and strain of joints and ligaments at wrist and hand level               | 846                                | Sprains & strains of sacroiliac region                                            |
|                                 | S72                         | Fracture of femur                                                                            | 8472-8474                          | Sprain of lumbar, sacrum, coccyx                                                  |
|                                 | S73                         | Dislocation, sprain and strain of joint and ligaments of hip                                 | 8485                               | Sprain of pelvic                                                                  |
|                                 | W0-<br>W1                   | Falls                                                                                        | 810-812                            | Fracture of clavicle, scapula, humerus                                            |
|                                 | M8<br>0                     | Osteoporosis with pathological fracture                                                      | 831-835                            | Dislocation of shoulder, elbow, wrist, finger, hip                                |
|                                 | M8<br>1                     | Osteoporosis without pathological fracture                                                   | 840-843                            | Sprains & strains of shoulder, upper arm, elbow, forearm, wrist, hand, hip, thigh |
|                                 | R29<br>6                    | Tendency to fall, not elsewhere classified                                                   | 83961 & 83971                      | Dislocation, sternum                                                              |
|                                 | R55                         | Syncope and collapse                                                                         | 8484                               | Sternum sprain                                                                    |
|                                 | R54                         | Senility                                                                                     | 813-817                            | Fracture of radius & ulna, carpal bone(s), metacarpal bone(s), phalanges of hand  |
|                                 | M9<br>66                    | Fracture of bone following insertion of orthopaedic implant, joint prosthesis, or bone plate | 820-821                            | Fracture of neck of femur and other parts of femur                                |
|                                 |                             | E88                                                                                          | Falls                              |                                                                                   |

|                                           |          |                                                              |       |                                                                         |
|-------------------------------------------|----------|--------------------------------------------------------------|-------|-------------------------------------------------------------------------|
|                                           |          |                                                              | 7330  | Osteoporosis                                                            |
|                                           |          |                                                              | 7331  | Pathological fracture                                                   |
|                                           |          |                                                              | V1588 | History of fall                                                         |
|                                           |          |                                                              | 7802  | Syncope and collapse                                                    |
|                                           |          |                                                              | 797   | Senility without mention of psychosis                                   |
|                                           |          |                                                              | 9964  | Mechanical complication of internal orthopedic device implant and graft |
| <b>4. Pressure Ulcers and Weight Loss</b> | L89      | Decubitus ulcer and pressure area                            | 7072  | Pressure ulcer                                                          |
|                                           | R63<br>4 | Abnormal weight loss                                         | 7070  | Decubitus ulcer                                                         |
|                                           | R63<br>6 | Insufficient intake of food and water due to self neglect    | 7832  | Abnormal Loss of Weight                                                 |
|                                           | Z72<br>4 | Inappropriate diet and eating habits                         | V691  | Inappropriate diet and eating habits                                    |
| <b>5. Incontinence</b>                    | R32      | Unspecified urinary incontinence                             | 7883  | Incontinence of urine                                                   |
|                                           | R15      | Faecal incontinence                                          | 7876  | Incontinence of feces                                                   |
| <b>6. Dependence and Care</b>             | Z74      | Problems related to care-provider dependency                 | V604  | No other household member able to render care                           |
|                                           | Z75      | Problems related to medical facilities and other health care | V63   | Unavailability of other medical facilities for care                     |
| <b>7. Anxiety and Depression</b>          | F38      | Other mood [affective] disorders                             | 2969  | Other & unspecified affective psychoses                                 |
|                                           | F41      | Other anxiety disorders                                      | 3000  | Anxiety states                                                          |
|                                           | F43      | Reaction to severe stress, and adjustment disorders          | 308   | Acute reaction to stress                                                |
|                                           | F44      | Dissociative [conversion] disorders                          | 309   | Adjustment reaction                                                     |
|                                           | F06<br>4 | Organic anxiety disorder                                     | 3001  | Hysteria                                                                |
|                                           | F32      | Depressive episode                                           | 2962  | Major depressive disorder, single episode                               |
|                                           | F33      | Recurrent depressive disorder                                | 2963  | Major depressive disorder, recurrent episode                            |
|                                           | F20<br>4 | Post-schizophrenic depression                                | 2965  | Bipolar affective disorder, depressed                                   |
|                                           | F25<br>1 | Schizoaffective disorder, depressive type                    | 3004  | Dysthymic disorder                                                      |
|                                           | F31      | Bipolar affective disorder                                   | 3090  | Adjustment disorder with depressed mood                                 |
|                                           | F34<br>1 | Dysthymia                                                    | 3091  | Prolonged depressive reaction                                           |
|                                           | F41<br>2 | Mixed anxiety and depressive disorder                        | 3092  | Adjustment reaction with predominant disturbance of other emotions      |
|                                           | F43<br>2 | Adjustment disorders                                         | 2968  | Manic-depressive psychosis, other & unspecified                         |
|                                           |          |                                                              | 2980  | Depressive type psychosis                                               |
|                                           |          |                                                              | 3011  | Affective personality disorder                                          |
|                                           |          |                                                              | 311   | Depressive disorder, not elsewhere classified                           |

Appendix 2: Odds Ratios for Frailty Score after adjustment for age, gender, country for the outcomes of in-hospital mortality, 30-day non-elective readmission and upper quartile length of stay (for country), by elective and non-elective population groups within the Global Comparators Dataset (Derivation)

### In-hospital mortality

Table 12: Odds Ratios of Frailty Score for in-hospital mortality adjusted for age, gender country within each subgroup (elective and non-elective)

#### Elective

|                          | Odds Ratio | Lower CI | Upper CI | P-value |
|--------------------------|------------|----------|----------|---------|
| (Intercept)              | 0.001      | 0.000    | 0.001    | <0.001  |
| Age                      | 1.041      | 1.029    | 1.054    | <0.001  |
| Sex - F                  | Reference  |          |          |         |
| Sex - M                  | 1.441      | 1.277    | 1.626    | <0.001  |
| Country - Australia      | Reference  |          |          |         |
| Country - Belgium        | 1.039      | 0.836    | 1.292    | 0.730   |
| Country - Denmark        | 0.913      | 0.668    | 1.248    | 0.569   |
| Country - Finland        | 0.318      | 0.227    | 0.446    | <0.001  |
| Country - Italy          | 0.702      | 0.496    | 0.994    | 0.046   |
| Country - Netherlands    | 1.413      | 1.107    | 1.803    | 0.005   |
| Country - Norway         | 0.616      | 0.492    | 0.770    | <0.001  |
| Country - United Kingdom | 0.566      | 0.467    | 0.686    | <0.001  |
| Country - United States  | 0.838      | 0.686    | 1.023    | 0.082   |
| Frailty Score            | 1.277      | 1.247    | 1.308    | <0.001  |

#### Non-elective

|                          | Odds Ratio | Lower CI | Upper CI | P-value |
|--------------------------|------------|----------|----------|---------|
| (Intercept)              | 0.002      | 0.002    | 0.003    | <0.001  |
| Age                      | 1.040      | 1.037    | 1.043    | <0.001  |
| Sex - F                  | Reference  |          |          |         |
| Sex - M                  | 1.305      | 1.265    | 1.346    | <0.001  |
| Country - Australia      | Reference  |          |          |         |
| Country - Belgium        | 1.338      | 1.213    | 1.478    | <0.001  |
| Country - Denmark        | 1.480      | 1.371    | 1.598    | <0.001  |
| Country - Finland        | 0.936      | 0.864    | 1.015    | 0.109   |
| Country - Italy          | 1.682      | 1.462    | 1.936    | <0.001  |
| Country - Netherlands    | 1.525      | 1.361    | 1.709    | <0.001  |
| Country - Norway         | 1.001      | 0.942    | 1.062    | 0.987   |
| Country - United Kingdom | 1.492      | 1.419    | 1.570    | <0.001  |
| Country - United States  | 0.897      | 0.844    | 0.953    | <0.001  |
| Frailty Score            | 1.109      | 1.103    | 1.116    | <0.001  |

## 30-day non-elective readmission

Table 13: Odds Ratios of Frailty Score for 30-day non-elective readmission adjusted for age, gender country within each subgroup (elective and non-elective)

## Elective

|                          | <b>Odds Ratio</b> | <b>Lower CI</b> | <b>Upper CI</b> | <b>P-value</b> |
|--------------------------|-------------------|-----------------|-----------------|----------------|
| (Intercept)              | 0.037             | 0.021           | 0.065           | <0.001         |
| Age                      | 1.002             | 0.995           | 1.009           | 0.622          |
| Sex - F                  | Reference         |                 |                 |                |
| Sex - M                  | 1.159             | 1.087           | 1.236           | <0.001         |
| Country - Australia      | Reference         |                 |                 |                |
| Country - Belgium        | 0.893             | 0.758           | 1.053           | 0.179          |
| Country - Denmark        | 1.573             | 1.339           | 1.847           | <0.001         |
| Country - Finland        | 1.153             | 1.003           | 1.326           | 0.045          |
| Country - Italy          | 0.500             | 0.391           | 0.640           | <0.001         |
| Country - Netherlands    | 1.174             | 0.988           | 1.395           | 0.068          |
| Country - Norway         | 1.616             | 1.434           | 1.821           | <0.001         |
| Country - United Kingdom | 1.094             | 0.975           | 1.228           | 0.125          |
| Country - United States  | 1.323             | 1.168           | 1.498           | <0.001         |
| Admission History        | 1.453             | 1.411           | 1.495           | <0.001         |
| Frailty Score            | 1.106             | 1.060           | 1.154           | <0.001         |

## Non-elective

|                          | <b>Odds Ratio</b> | <b>Lower CI</b> | <b>Upper CI</b> | <b>P-value</b> |
|--------------------------|-------------------|-----------------|-----------------|----------------|
| (Intercept)              | 0.112             | 0.091           | 0.136           | <0.001         |
| Age                      | 0.998             | 0.996           | 1.001           | 0.201          |
| Sex - F                  | Reference         |                 |                 |                |
| Sex - M                  | 1.167             | 1.137           | 1.198           | <0.001         |
| Country - Australia      | Reference         |                 |                 |                |
| Country - Belgium        | 0.803             | 0.722           | 0.893           | <0.001         |
| Country - Denmark        | 1.317             | 1.231           | 1.408           | <0.001         |
| Country - Finland        | 0.995             | 0.931           | 1.063           | 0.879          |
| Country - Italy          | 0.760             | 0.646           | 0.893           | 0.001          |
| Country - Netherlands    | 0.774             | 0.683           | 0.877           | <0.001         |
| Country - Norway         | 1.582             | 1.507           | 1.660           | <0.001         |
| Country - United Kingdom | 1.362             | 1.302           | 1.425           | <0.001         |
| Country - United States  | 1.274             | 1.211           | 1.340           | <0.001         |
| Admission History        | 1.315             | 1.303           | 1.326           | <0.001         |
| Frailty Score            | 1.056             | 1.031           | 1.082           | <0.001         |



## Upper Quartile Length of Stay (for country)

Table 14: Odds Ratios of Frailty Score for Upper Quartile Length of Stay (for country) adjusted for age, gender country within each subgroup (elective and non-elective)

## Elective

|                          | Odds Ratio | Lower CI | Upper CI | P-value |
|--------------------------|------------|----------|----------|---------|
| (Intercept)              | 0.065      | 0.045    | 0.094    | <0.001  |
| Age                      | 1.016      | 1.011    | 1.020    | <0.001  |
| Sex - F                  | Reference  |          |          |         |
| Sex - M                  | 0.966      | 0.927    | 1.008    | 0.112   |
| Country - Australia      | Reference  |          |          |         |
| Country - Belgium        | 0.415      | 0.376    | 0.457    | <0.001  |
| Country - Denmark        | 0.616      | 0.549    | 0.691    | <0.001  |
| Country - Finland        | 0.511      | 0.467    | 0.558    | <0.001  |
| Country - Italy          | 1.053      | 0.953    | 1.162    | 0.310   |
| Country - Netherlands    | 0.763      | 0.691    | 0.843    | <0.001  |
| Country - Norway         | 0.767      | 0.713    | 0.825    | <0.001  |
| Country - United Kingdom | 0.294      | 0.273    | 0.316    | <0.001  |
| Country - United States  | 0.819      | 0.765    | 0.878    | <0.001  |
| Frailty Score            | 1.365      | 1.347    | 1.382    | <0.001  |

## Non-elective

|                          | Odds Ratio | Lower CI | Upper CI | P-value |
|--------------------------|------------|----------|----------|---------|
| (Intercept)              | 0.284      | 0.245    | 0.330    | <0.001  |
| Age                      | 0.995      | 0.993    | 0.996    | <0.001  |
| Sex - F                  | Reference  |          |          | <0.001  |
| Sex - M                  | 1.055      | 1.034    | 1.076    | <0.001  |
| Country - Australia      | Reference  |          |          | <0.001  |
| Country - Belgium        | 1.766      | 1.658    | 1.881    | <0.001  |
| Country - Denmark        | 1.570      | 1.492    | 1.652    | <0.001  |
| Country - Finland        | 1.705      | 1.628    | 1.786    | <0.001  |
| Country - Italy          | 2.270      | 2.074    | 2.484    | <0.001  |
| Country - Netherlands    | 2.268      | 2.112    | 2.435    | <0.001  |
| Country - Norway         | 1.303      | 1.254    | 1.353    | <0.001  |
| Country - United Kingdom | 1.508      | 1.459    | 1.559    | <0.001  |
| Country - United States  | 1.434      | 1.382    | 1.488    | <0.001  |
| Frailty Score            | 1.199      | 1.194    | 1.205    | <0.001  |

Appendix 3: Odds Ratios for Frailty Score after adjustment for age, gender, calendar year for the outcomes of in-hospital mortality, 30-day non-elective readmission and upper quartile length of stay (for country), by elective and non-elective population groups in Hospital Episode Statistics dataset (Validation)

### In-hospital mortality

Table 15: Odds Ratios of Frailty Score for in-hospital mortality adjusted for age, gender and calendar year within each subgroup (elective and non-elective)

#### Elective

|                      | Odds Ratio   | Lower CI     | Upper CI     | Z-value        | P-value      |
|----------------------|--------------|--------------|--------------|----------------|--------------|
| (Intercept)          | 0.001        | 0.001        | 0.001        | -338.153       | 0.000        |
| Age                  | 1.051        | 1.050        | 1.051        | 206.705        | 0.000        |
| Sex - F              | Reference    |              |              |                |              |
| Sex - M              | 1.274        | 1.267        | 1.281        | 84.839         | 0.000        |
| Calendar Year - 2012 | Reference    |              |              |                |              |
| Calendar Year - 2013 | 0.938        | 0.931        | 0.945        | -16.172        | 0.000        |
| Calendar Year - 2014 | 0.851        | 0.844        | 0.857        | -40.603        | 0.000        |
| Calendar Year - 2015 | 0.865        | 0.858        | 0.871        | -36.727        | 0.000        |
| <b>Frailty Score</b> | <b>1.173</b> | <b>1.171</b> | <b>1.174</b> | <b>279.196</b> | <b>0.000</b> |

#### Non-elective

|                      | Odds Ratio   | Lower CI     | Upper CI     | Z-value        | P-value      |
|----------------------|--------------|--------------|--------------|----------------|--------------|
| (Intercept)          | 0.001        | 0.001        | 0.001        | -353.600       | 0.000        |
| Age                  | 1.055        | 1.055        | 1.056        | 227.822        | 0.000        |
| Sex - F              | Reference    |              |              |                |              |
| Sex - M              | 1.233        | 1.226        | 1.240        | 73.302         | 0.000        |
| Calendar Year - 2012 | Reference    |              |              |                |              |
| Calendar Year - 2013 | 0.936        | 0.929        | 0.944        | -16.598        | 0.000        |
| Calendar Year - 2014 | 0.850        | 0.844        | 0.857        | -40.640        | 0.000        |
| Calendar Year - 2015 | 0.869        | 0.862        | 0.876        | -35.371        | 0.000        |
| <b>Frailty Score</b> | <b>1.108</b> | <b>1.107</b> | <b>1.109</b> | <b>315.847</b> | <b>0.000</b> |

## 30-day non-elective readmission

Table 16: Odds Ratios of Frailty Score for 30-day non-elective readmission adjusted for age, gender and calendar year within each subgroup (elective and non-elective)

## Elective

|                               | <b>Odds Ratio</b> | <b>Lower CI</b> | <b>Upper CI</b> | <b>Z-value</b> | <b>P-value</b> |
|-------------------------------|-------------------|-----------------|-----------------|----------------|----------------|
| (Intercept)                   | 0.055             | 0.054           | 0.057           | -186.458       | 0.000          |
| Age                           | 1.011             | 1.010           | 1.011           | 58.247         | 0.000          |
| Sex - F                       | Reference         |                 |                 |                |                |
| Sex - M                       | 1.119             | 1.114           | 1.123           | 53.787         | 0.000          |
| Calendar Year - 2012          | Reference         |                 |                 |                |                |
| Calendar Year - 2013          | 0.994             | 0.989           | 1               | -1.918         | 0.055          |
| Calendar Year - 2014          | 1.015             | 1.009           | 1.021           | 5.090          | 0.000          |
| Calendar Year - 2015          | 1.018             | 1.012           | 1.024           | 6.228          | 0.000          |
| Previous Emergency Admissions | 1.443             | 1.440           | 1.445           | 379.358        | 0.000          |
| <b>Frailty Score</b>          | 1.045             | 1.044           | 1.047           | 77.860         | 0.000          |

## Non-elective

|                               | <b>Odds Ratio</b> | <b>Lower CI</b> | <b>Upper CI</b> | <b>Z-value</b> | <b>P-value</b> |
|-------------------------------|-------------------|-----------------|-----------------|----------------|----------------|
| (Intercept)                   | 0.053             | 0.051           | 0.054           | -191.317       | 0.000          |
| Age                           | 1.011             | 1.011           | 1.012           | 62.570         | 0.000          |
| Sex - F                       | Reference         |                 |                 |                |                |
| Sex - M                       | 1.121             | 1.117           | 1.126           | 54.752         | 0.000          |
| Calendar Year - 2012          | Reference         |                 |                 |                |                |
| Calendar Year - 2013          | 0.993             | 0.987           | 0.998           | -2.526         | 0.012          |
| Calendar Year - 2014          | 1.012             | 1.007           | 1.018           | 4.231          | 0.000          |
| Calendar Year - 2015          | 1.015             | 1.010           | 1.021           | 5.218          | 0.000          |
| Previous Emergency Admissions | 1.439             | 1.436           | 1.442           | 376.406        | 0.000          |
| <b>Frailty Score</b>          | 1.030             | 1.030           | 1.031           | 85.172         | 0.000          |

## Upper quartile length of stay

Table 17: Odds Ratios of Frailty Score for upper quartile length of stay adjusted for age, gender and calendar year within each subgroup (elective and non-elective)

## Elective

|                      | <b>Odds Ratio</b> | <b>Lower CI</b> | <b>Upper CI</b> | <b>Z-value</b> | <b>P-value</b> |
|----------------------|-------------------|-----------------|-----------------|----------------|----------------|
| (Intercept)          | 0.030             | 0.029           | 0.031           | -258.331       | 0.000          |
| Age                  | 1.023             | 1.023           | 1.024           | 143.925        | 0.000          |
| Sex - F              | Reference         |                 |                 |                |                |
| Sex - M              | 0.940             | 0.937           | 0.944           | -32.930        | 0.000          |
| Calendar Year - 2012 | Reference         |                 |                 |                |                |
| Calendar Year - 2013 | 0.975             | 0.970           | 0.980           | -9.874         | 0.000          |
| Calendar Year - 2014 | 0.891             | 0.886           | 0.895           | -44.736        | 0.000          |
| Calendar Year - 2015 | 0.872             | 0.868           | 0.877           | -52.705        | 0.000          |
| <b>Frailty Score</b> | <b>1.193</b>      | <b>1.192</b>    | <b>1.193</b>    | <b>593.715</b> | <b>0.000</b>   |

## Non-elective

|                      | <b>Odds Ratio</b> | <b>Lower CI</b> | <b>Upper CI</b> | <b>Z-value</b> | <b>P-value</b> |
|----------------------|-------------------|-----------------|-----------------|----------------|----------------|
| (Intercept)          | 0.031             | 0.030           | 0.032           | -255.862       | 0.000          |
| Age                  | 1.023             | 1.022           | 1.023           | 139.087        | 0.000          |
| Sex - F              | Reference         |                 |                 |                |                |
| Sex - M              | 0.948             | 0.944           | 0.951           | -28.576        | 0.000          |
| Calendar Year - 2012 | Reference         |                 |                 |                |                |
| Calendar Year - 2013 | 0.979             | 0.974           | 0.984           | -8.288         | 0.000          |
| Calendar Year - 2014 | 0.896             | 0.891           | 0.900           | -42.538        | 0.000          |
| Calendar Year - 2015 | 0.878             | 0.874           | 0.883           | -50.020        | 0.000          |
| <b>Frailty Score</b> | <b>1.055</b>      | <b>1.055</b>    | <b>1.055</b>    | <b>602.049</b> | <b>0.000</b>   |

## Appendix 4 Case-mix adjustment for older persons utilising administrative data

| Author              | Year | Country        | Study population                                                                       | N      | Data Source                                                                                         | Outcome                           | Predictors                                                                                                                                    | Model performance                                                |
|---------------------|------|----------------|----------------------------------------------------------------------------------------|--------|-----------------------------------------------------------------------------------------------------|-----------------------------------|-----------------------------------------------------------------------------------------------------------------------------------------------|------------------------------------------------------------------|
| Von Korff et al.(1) | 1991 | United States  | Population based pharmacy data                                                         | 122911 | Administrative                                                                                      | Mortality and hospitalisation     | Consensus based Chronic Disease Score(CDS)                                                                                                    |                                                                  |
| Rosen et al.(2)     | 2001 | United States  | Long-term facility resident (Veterans Affairs)                                         | 39839  | Administrative (Patient Assessment File(PAF), Patient Treatment File(PTF), Extended Care File(ECF)) | Decline in functional status      | International Classification of Diseases, Ninth Revision Clinical Modification (ICD-9) , demographics, treatments, activities of daily living | AUC for decline in functional status is 0.70                     |
| Desai et al.(3)     | 2002 | United States  | ≥70 admitted to geriatric service                                                      | 1376   | Administrative (Management Information System)                                                      | Mortality                         | International Classification of Diseases system version 9 (ICD-9)                                                                             | AUC 0.76 for mortality in derivation and AUV 0.68 in validation) |
| Kautter et al.(4)   | 2004 | United States  | Medicare                                                                               | 17597  | Administrative The Medicare Current Beneficiary Survey (MCBS)                                       | Cost                              | ADLs, Long-term institution status, Age                                                                                                       |                                                                  |
| Roland et al.(5)    | 2005 | United Kingdom | Individual patients aged ≥ 65, ≥ 75, and ≥ 85who had at least two emergency admissions | 227206 | Administrative (Hospital Episode Statistics)                                                        | Non-elective hospital readmission | Individual patients aged ≥ 65who had at least two emergency admissions                                                                        |                                                                  |

|                         |      |                |                                                                    |        |                                                                           |                                                                                                                                          |                                                                                                                                                                                                                                          |                                                                                   |
|-------------------------|------|----------------|--------------------------------------------------------------------|--------|---------------------------------------------------------------------------|------------------------------------------------------------------------------------------------------------------------------------------|------------------------------------------------------------------------------------------------------------------------------------------------------------------------------------------------------------------------------------------|-----------------------------------------------------------------------------------|
| Inoye et al.(6)         | 2008 | United States  | Primary care clinic                                                | 3919   | Administrative                                                            | Non-elective hospital admission                                                                                                          | Deyo-Charlson, comorbidity score $\geq 2$ , any prior hospitalization 6 or more primary care visits, $\geq 85$ years unmarried status                                                                                                    | AUC 0.73                                                                          |
| Sternberg et al.(7)     | 2012 | Israel         | Patients receiving Comprehensive Geriatric Assessment via OPD      | 221    | Administrative; and survey                                                | Resource utilisation (number of physician visits in 3 months, number of ED visits in a year, and number of hospitalizations in the year) | VES Frailty Score(13-item function-based self-report questionnaire The Adjusted Clinical Groups–diagnoses based predictive model (ACG Dx-PM) based on age, sex, diagnostic codes, and pharmacy data                                      | ACG predict frailty defined by VES – AUC 0.63                                     |
| Davidoff et al.(8)      | 2013 | United States  | US Medicare beneficiaries aged $\geq 65$ years                     | 14788  | Administrative (Medicare) and Medicare Current Beneficiary Survey (MCBS), | Disability Status                                                                                                                        | Healthcare services, Berenson-Eggers Type of Service (BETOS) codes- American Medical Association's Current Procedural Terminology (CPT) codes, or the CMS, Healthcare Common Procedure Coding System (HCPCS level II) codes, demographic | AUC 0.92 for disability status                                                    |
| Bottle et al.(9)        | 2014 | United Kingdom | Admitted with heart failure                                        | 84212  | Administrative (Hospital Episode statistics)                              | Non-elective hospital readmission                                                                                                        | AHRQ's (Agency for Healthcare Research and Quality) Clinical Classification System International Classification of Diseases system version 10 (ICD-10)                                                                                   |                                                                                   |
| Chrischilles et al.(10) | 2014 | United States  | US Medicare beneficiaries aged $\geq 65$ years admitted with acute | 144112 | Administrative                                                            | Mortality, cardiac catheterisation                                                                                                       | Demographic measures, cardiovascular conditions, comorbidities, previous hospitalization, and Function related indicators(FRI)                                                                                                           | AUC Mortality 0.74, AUC cardiac catheterisation 0.79, Including the FRIs improved |

|                   |      |                |                                                            |           |                                                               |                                                                  |                                                                                                                                                                                                                                                                                             |                                                                                                          |
|-------------------|------|----------------|------------------------------------------------------------|-----------|---------------------------------------------------------------|------------------------------------------------------------------|---------------------------------------------------------------------------------------------------------------------------------------------------------------------------------------------------------------------------------------------------------------------------------------------|----------------------------------------------------------------------------------------------------------|
|                   |      |                | myocardial infarction                                      |           |                                                               |                                                                  |                                                                                                                                                                                                                                                                                             | prediction models                                                                                        |
| Ruiz et al.(11)   | 2015 | United Kingdom | Individual patients aged $\geq 65$ with hospital admission | 2788900   | Administrative (Hospital Episode Statistics)                  | Mortality, Non-elective hospital readmission, Hospital admission | $\geq 65$ years old, who have at least 3 simultaneous diagnoses of major clinical conditions.                                                                                                                                                                                               |                                                                                                          |
| Faurot et al.(12) | 2015 | United States  | $\geq 65$ community dwelling                               | 6391      | Administrative and Medicare Current Beneficiary Survey (MCBS) | Functional decline                                               | demographics, International Classification of Diseases, Ninth Revision Clinical Modification (ICD-9) diagnosis/procedure and durable medical equipment codes for frailty-associated conditions, (Current Procedural Terminology (CPT) and Healthcare Common Procedure Coding System (HCPC)) |                                                                                                          |
| Hope et al.(13)   | 2015 | United States  | $>70$ admitted to ICU                                      | 47427     | Administrative (Medicare)                                     | Mortality                                                        | International Classification of Diseases, Ninth Revision Clinical Modification (ICD-9) diagnosis & claims for skilled nursing facility: creation of four categories: 1)Cancer 2)Chronic Organ Failure3)Frailty4) Robust                                                                     |                                                                                                          |
| Soong et al.      | 2015 | United Kingdom | $>65$ non-elective admission to hospital                   | 2 099 252 | Administrative                                                | Mortality, non-elective readmission, functional decline          | ICD-10 coded Frailty Syndromes                                                                                                                                                                                                                                                              | AUC of 0.624–0.659 for inpatient mortality, 0.63–0.654 for institutionalisation and 0.57–0.63 for 30-day |

|                    |      |                |                                                            |           |                                                                                                                 |                                                                 |                                                                                                                                                                                                              |                                                                                          |
|--------------------|------|----------------|------------------------------------------------------------|-----------|-----------------------------------------------------------------------------------------------------------------|-----------------------------------------------------------------|--------------------------------------------------------------------------------------------------------------------------------------------------------------------------------------------------------------|------------------------------------------------------------------------------------------|
|                    |      |                |                                                            |           |                                                                                                                 |                                                                 |                                                                                                                                                                                                              | emergency readmission.                                                                   |
| Briggs et al.(14)  | 2016 | Ireland        | Patients admitted with dementia to single hospital         | 929       | Administrative                                                                                                  | Cost                                                            | International Classification of Diseases system version 10 (ICD-10)                                                                                                                                          |                                                                                          |
| Mclsaac et al.(15) | 2016 | Canada         | >65 years Elective non-cardiac surgery                     | 202811    | Administrative Discharge Abstract Database, Ontario Health Insurance Plan Database, Registered Persons Database | Inpatient mortality                                             | John's Hopkins Adjusted Clinical Groups (ACG, Johns Hopkins University) frailty-defining diagnoses indicator,                                                                                                |                                                                                          |
| Kim et al.(16)     | 2017 | United States  | ≥ 65 community dwelling                                    | 10017     | Administrative (Medicare) and Medicare Current Beneficiary Survey (MCBS)                                        | Mortality, disability, mobility impairment, and recurrent falls | International Classification of Diseases, Ninth Revision Clinical Modification (ICD-9) (Current Procedural Terminology (CPT) and Healthcare Common Procedure Coding System (HCPC)) to create a frailty index |                                                                                          |
| Gilbert et al.(17) | 2018 | United Kingdom | >75 years elective and non-elective admissions to hospital | 1 013 590 | Administrative Hospital Episode Statistics                                                                      | Mortality, long length of stay, non-elective readmission        | ICD-10 Codes identified by cluster analysis for Bed days, Hospital costs, and ICD-10 coded Frailty Syndromes                                                                                                 | AUC 0-60 for 30-day mortality, 0-68 for long hospital stay, 0-56 for 30-day readmission. |



## References

1. Von Korff M, Wagner EH, Saunders K. A chronic disease score from automated pharmacy data. *Journal of Clinical Epidemiology*. 45(2):197-203.
2. Amy R, Jeanne W, Bei-Hung C, Dan B, Carter R, Arlene A, et al. Risk Adjustment for Measuring Health Outcomes: An Application in VA Long term Care. *American Journal of Medical Quality*. 2001;16(4):118-27.
3. Desai Mayur M, Bogardus Sidney T, Williams Christianna S, Vitagliano G, Inouye Sharon K. Development and Validation of a Risk-Adjustment Index for Older Patients: The High-Risk Diagnoses for the Elderly Scale. *Journal of the American Geriatrics Society*. 2002;50(3):474-81.
4. Kautter J, Pope GC. CMS Frailty Adjustment Model. *Health Care Financing Review*. 2004;26(2):1-19.
5. Roland M, Dusheiko M, Gravelle H, Parker S. Follow up of people aged 65 and over with a history of emergency admissions: analysis of routine admission data. *BMJ*. 2005;330(7486):289-92.
6. Inouye S, Md MPH, Zhang Y, Jones R, Shi P, Cupples L, et al. Risk Factors for Hospitalization Among Community-Dwelling Primary Care Older Patients: Development and Validation of a Predictive Model. *Med Care*. 2008;46(7):726-31.
7. Sternberg SA, Wershof Schwartz A, Karunanathan S, Bergman H, Mark Clarfield A. The identification of frailty: a systematic literature review. *J Am Geriatr Soc*. 2011;59(11):2129-38.
8. Davidoff AJ, Hurria A, Zuckerman IH, Lichtman SM, Pandya N, Hussain A, et al. A Novel Approach to Improve Health Status Measurement in Observational Claims-based Studies of Cancer Treatment and Outcomes. *Journal of geriatric oncology*. 2013;4(2):157-65.
9. Bottle A, Aylin P, Bell D. Effect of the readmission primary diagnosis and time interval in heart failure patients: analysis of English administrative data. *European Journal of Heart Failure*. 2014;16(8):846-53.
10. Chrischilles E, Schneider K, Wilwert J, Lessman G, O'Donnell B, Gryzlak B, et al. Beyond Comorbidity: Expanding the Definition and Measurement of Complexity Among Older Adults Using Administrative Claims Data. *Medical Care*. 2014;52:S75-S84.
11. Ruiz M, Bottle A, Long S, Aylin P. Multi-Morbidity in Hospitalised Older Patients: Who Are the Complex Elderly? . *PLoS ONE*. 2015;10(12).
12. Faurot KR, Funk MJ, Pate V, Brookhart MA, Patrick A, Hanson LC, et al. Using Claims Data to Predict Dependency in Activities of Daily Living as a Proxy for Frailty. *Pharmacoepidemiology and drug safety*. 2015;24(1):59-66.
13. Hope Aluko A, Gong Michelle N, Guerra C, Wunsch H. Frailty Before Critical Illness and Mortality for Elderly Medicare Beneficiaries. *Journal of the American Geriatrics Society*. 2015;63(6):1121-8.
14. Briggs R, Coary R, Collins R, Coughlan T, O'Neill D, Kennelly SP. Acute hospital care: how much activity is attributable to caring for patients with dementia? *QJM*. 2016;109(1):41-4.
15. Mclsaac DI, Bryson GL, van Walraven C. Association of frailty and 1-year postoperative mortality following major elective noncardiac surgery: A population-based cohort study. *JAMA Surgery*. 2016;151(6):538-45.
16. Kim DH, Schneeweiss S, Glynn RJ, Lipsitz LA, Rockwood K, Avorn J. Measuring Frailty in Medicare Data: Development and Validation of a Claims-Based Frailty Index. *The Journals of Gerontology: Series A*. 2017:glx229-glx.
17. Gilbert T, Neuburger J, Kraindler J, Keeble E, Smith P, Ariti C, et al. Development and validation of a Hospital Frailty Risk Score focusing on older people in acute care settings using electronic hospital records: an observational study. *The Lancet*. 2018;391(10132):1775-82.

1  
2  
3  
4  
5  
6  
7  
8  
9  
10  
11  
12  
13  
14  
15  
16  
17  
18  
19  
20  
21  
22  
23  
24  
25  
26  
27  
28  
29  
30  
31  
32  
33  
34  
35  
36  
37  
38  
39  
40  
41  
42  
43  
44  
45  
46

For peer review only

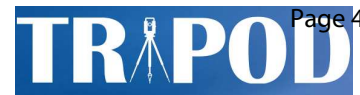

## TRIPOD Checklist: Prediction Model Development and Validation

| Section/Topic                | Item | Checklist Item | Page                                                                                                                                                                                                  |               |
|------------------------------|------|----------------|-------------------------------------------------------------------------------------------------------------------------------------------------------------------------------------------------------|---------------|
| <b>Title and abstract</b>    |      |                |                                                                                                                                                                                                       |               |
| Title                        | 1    | D;V            | Identify the study as developing and/or validating a multivariable prediction model, the target population, and the outcome to be predicted.                                                          | 2             |
| Abstract                     | 2    | D;V            | Provide a summary of objectives, study design, setting, participants, sample size, predictors, outcome, statistical analysis, results, and conclusions.                                               | 3             |
| <b>Introduction</b>          |      |                |                                                                                                                                                                                                       |               |
| Background and objectives    | 3a   | D;V            | Explain the medical context (including whether diagnostic or prognostic) and rationale for developing or validating the multivariable prediction model, including references to existing models.      | 5             |
|                              | 3b   | D;V            | Specify the objectives, including whether the study describes the development or validation of the model or both.                                                                                     | 5             |
| <b>Methods</b>               |      |                |                                                                                                                                                                                                       |               |
| Source of data               | 4a   | D;V            | Describe the study design or source of data (e.g., randomized trial, cohort, or registry data), separately for the development and validation data sets, if applicable.                               | 6             |
|                              | 4b   | D;V            | Specify the key study dates, including start of accrual; end of accrual; and, if applicable, end of follow-up.                                                                                        | 6-7           |
| Participants                 | 5a   | D;V            | Specify key elements of the study setting (e.g., primary care, secondary care, general population) including number and location of centres.                                                          | 7             |
|                              | 5b   | D;V            | Describe eligibility criteria for participants.                                                                                                                                                       | 7             |
|                              | 5c   | D;V            | Give details of treatments received, if relevant.                                                                                                                                                     | NA            |
| Outcome                      | 6a   | D;V            | Clearly define the outcome that is predicted by the prediction model, including how and when assessed.                                                                                                | 9             |
|                              | 6b   | D;V            | Report any actions to blind assessment of the outcome to be predicted.                                                                                                                                | NA            |
| Predictors                   | 7a   | D;V            | Clearly define all predictors used in developing or validating the multivariable prediction model, including how and when they were measured.                                                         | 8-9, App 1    |
|                              | 7b   | D;V            | Report any actions to blind assessment of predictors for the outcome and other predictors.                                                                                                            | NA            |
| Sample size                  | 8    | D;V            | Explain how the study size was arrived at.                                                                                                                                                            | 7             |
| Missing data                 | 9    | D;V            | Describe how missing data were handled (e.g., complete-case analysis, single imputation, multiple imputation) with details of any imputation method.                                                  | 7             |
| Statistical analysis methods | 10a  | D              | Describe how predictors were handled in the analyses.                                                                                                                                                 | 8-10          |
|                              | 10b  | D              | Specify type of model, all model-building procedures (including any predictor selection), and method for internal validation.                                                                         | 8-10          |
|                              | 10c  | V              | For validation, describe how the predictions were calculated.                                                                                                                                         | 8-10          |
|                              | 10d  | D;V            | Specify all measures used to assess model performance and, if relevant, to compare multiple models.                                                                                                   | 10            |
|                              | 10e  | V              | Describe any model updating (e.g., recalibration) arising from the validation, if done.                                                                                                               | NA            |
| Risk groups                  | 11   | D;V            | Provide details on how risk groups were created, if done.                                                                                                                                             | NA            |
| Development vs. validation   | 12   | V              | For validation, identify any differences from the development data in setting, eligibility criteria, outcome, and predictors.                                                                         | 6-7           |
| <b>Results</b>               |      |                |                                                                                                                                                                                                       |               |
| Participants                 | 13a  | D;V            | Describe the flow of participants through the study, including the number of participants with and without the outcome and, if applicable, a summary of the follow-up time. A diagram may be helpful. | 11, 15        |
|                              | 13b  | D;V            | Describe the characteristics of the participants (basic demographics, clinical features, available predictors), including the number of participants with missing data for predictors and outcome.    | 11            |
|                              | 13c  | V              | For validation, show a comparison with the development data of the distribution of important variables (demographics, predictors and outcome).                                                        | 15-16         |
| Model development            | 14a  | D              | Specify the number of participants and outcome events in each analysis.                                                                                                                               | 11-14 App 2-3 |
|                              | 14b  | D              | If done, report the unadjusted association between each candidate predictor and outcome.                                                                                                              | NA            |
| Model specification          | 15a  | D              | Present the full prediction model to allow predictions for individuals (i.e., all regression coefficients, and model intercept or baseline survival at a given time point).                           | 11-14 App 2-3 |
|                              | 15b  | D              | Explain how to use the prediction model.                                                                                                                                                              | NA            |
| Model performance            | 16   | D;V            | Report performance measures (with CIs) for the prediction model.                                                                                                                                      | 15-16         |
| Model-updating               | 17   | V              | If done, report the results from any model updating (i.e., model specification, model performance).                                                                                                   | NA            |
| <b>Discussion</b>            |      |                |                                                                                                                                                                                                       |               |
| Limitations                  | 18   | D;V            | Discuss any limitations of the study (such as nonrepresentative sample, few events per predictor, missing data).                                                                                      | 18            |
| Interpretation               | 19a  | V              | For validation, discuss the results with reference to performance in the development data, and any other validation data.                                                                             | 16-17         |
|                              | 19b  | D;V            | Give an overall interpretation of the results, considering objectives, limitations, results from similar studies, and other relevant evidence.                                                        | 16-18 App 4   |
| Implications                 | 20   | D;V            | Discuss the potential clinical use of the model and implications for future research.                                                                                                                 | 18-19         |
| <b>Other information</b>     |      |                |                                                                                                                                                                                                       |               |
| Supplementary information    | 21   | D;V            | Provide information about the availability of supplementary resources, such as study protocol, Web calculator, and data sets.                                                                         | App 1-4       |
| Funding                      | 22   | D;V            | Give the source of funding and the role of the funders for the present study.                                                                                                                         | 19            |

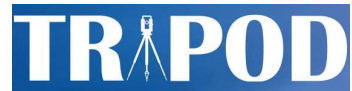

### TRIPOD Checklist: Prediction Model Development and Validation

1  
2  
3  
4  
5  
6  
7  
8  
9  
10  
11  
12  
13  
14  
15  
16  
17  
18  
19  
20  
21  
22  
23  
24  
25  
26  
27  
28  
29  
30  
31  
32  
33  
34  
35  
36  
37  
38  
39  
40  
41  
42  
43  
44  
45  
46  
47  
48  
49  
50  
51  
52  
53  
54  
55  
56  
57  
58  
59  
60

\*Items relevant only to the development of a prediction model are denoted by D, items relating solely to a validation of a prediction model are denoted by V, and items relating to both are denoted D;V. We recommend using the TRIPOD Checklist in conjunction with the TRIPOD Explanation and Elaboration document.

For peer review only
