# Supplementary material for: Dr Foster global frailty score: an international retrospective observational study developing and validating a risk prediction model for hospitalised older persons from administrative data sets
Source: PubMed Central journal article supplement — BMJ Open. 2019 Jun 22;9(6):e026759. doi: 10.1136/bmjopen-2018-026759 (PMC6596946; doi:10.1136/bmjopen-2018-026759), 2019-06-22
Supplement: bmjopen-2018-026759supp001.pdf [file bmjopen-2018-026759supp001.pdf]

## Appendix 1 ICD-10 and ICD-9 coding for frailty syndromes

| Group                           | ICD-10                        | Description (ICD-10)                                                                         | ICD-9                                                                                      | Description (ICD-9)                                                               |                                                                   |
|---------------------------------|-------------------------------|----------------------------------------------------------------------------------------------|--------------------------------------------------------------------------------------------|-----------------------------------------------------------------------------------|-------------------------------------------------------------------|
| <b>1. Dementia and Delirium</b> | F00                           | Dementia in Alzheimer's disease                                                              | 2904                                                                                       | Arteriosclerotic dementia                                                         |                                                                   |
|                                 | F01                           | Vascular dementia                                                                            | 2941-2942                                                                                  | Dementia in other diseases and unspecified dementia                               |                                                                   |
|                                 | F02                           | Dementia in other diseases classified elsewhere                                              | 2930-2931                                                                                  | Subacute delirium and delirium due to conditions classified elsewhere             |                                                                   |
|                                 | F03                           | Unspecified dementia                                                                         | V4031                                                                                      | Wandering in diseases classified elsewhere                                        |                                                                   |
|                                 | F05                           | Delirium not induced by alcohol and other psychoactive                                       | 3310                                                                                       | Alzheimer's disease                                                               |                                                                   |
|                                 | G30                           | Alzheimer's disease                                                                          | 3312                                                                                       | Senile degeneration of brain                                                      |                                                                   |
|                                 | G31                           | Senile degeneration of brain, not elsewhere classified                                       | 2900-2903                                                                                  | Senile and presenile dementia, dementia with delirium                             |                                                                   |
|                                 | G31                           | Circumscribed brain atrophy                                                                  | 33119                                                                                      | Other frontotemporal dementia                                                     |                                                                   |
|                                 | F04                           | Organic amnesic syndrome, not induced by alcohol and other psychoactive substances           | 33182                                                                                      | Dementia with lewy bodies                                                         |                                                                   |
|                                 | R41                           | Other symptoms and signs involving cognitive functions and awareness                         | 2908-2909                                                                                  | Other senile psychotic conditions                                                 |                                                                   |
|                                 |                               |                                                                                              | 2948-2949                                                                                  | Other persistent mental disorders due to conditions classified elsewhere          |                                                                   |
|                                 |                               |                                                                                              | 2940                                                                                       | Amnesic disorder in conditions classified elsewhere                               |                                                                   |
|                                 | <b>2. Mobility Problems</b>   | R26                                                                                          | Abnormalities of gait and mobility                                                         | 7812                                                                              | Abnormality of gait                                               |
|                                 |                               | R29                                                                                          | Other and unspecified symptoms and signs involving the nervous and musculoskeletal systems | 78199                                                                             | Other symptoms involving nervous and musculoskeletal systems      |
|                                 | <b>3. Falls and Fractures</b> | S32                                                                                          | Fracture of lumbar spine and pelvis                                                        | 8054-8055                                                                         | Fracture of lumbar vertebra without mention of spinal cord injury |
|                                 |                               | S33                                                                                          | Dislocation, sprain and strain of joints and ligaments of lumbar spine and pelvis          | 8064-8065                                                                         | Fracture of lumbar spine with spinal cord injury                  |
| S42                             |                               | Fracture of shoulder and upper arm                                                           | 8056-8057                                                                                  | Fracture of sacrum and coccyx without mention of spinal cord injury               |                                                                   |
| S43                             |                               | Dislocation, sprain and strain of joints and ligaments of shoulder girdle                    | 8066-8067                                                                                  | Fracture of sacrum & coccyx with spinal cord injury                               |                                                                   |
| S52                             |                               | Fracture of forearm                                                                          | 808-809                                                                                    | Fracture of pelvis and ill-defined fractures of bones of trunk                    |                                                                   |
| S53                             |                               | Dislocation, sprain and strain of joints and ligaments of elbow                              | 8392-8393                                                                                  | Dislocation, thoracic & lumbar vertebra                                           |                                                                   |
| S62                             |                               | Fracture at wrist and hand level                                                             | 83941-83952                                                                                | Dislocation, coccyx and sacrum                                                    |                                                                   |
| S63                             |                               | Dislocation, sprain and strain of joints and ligaments at wrist and hand level               | 846                                                                                        | Sprains & strains of sacroiliac region                                            |                                                                   |
| S72                             |                               | Fracture of femur                                                                            | 8472-8474                                                                                  | Sprain of lumbar, sacrum, coccyx                                                  |                                                                   |
| S73                             |                               | Dislocation, sprain and strain of joint and ligaments of hip                                 | 8485                                                                                       | Sprain of pelvic                                                                  |                                                                   |
| W0-W1                           |                               | Falls                                                                                        | 810-812                                                                                    | Fracture of clavicle, scapula, humerus                                            |                                                                   |
| M8                              |                               | Osteoporosis with pathological fracture                                                      | 831-835                                                                                    | Dislocation of shoulder, elbow, wrist, finger, hip                                |                                                                   |
| M8                              |                               | Osteoporosis without pathological fracture                                                   | 840-843                                                                                    | Sprains & strains of shoulder, upper arm, elbow, forearm, wrist, hand, hip, thigh |                                                                   |
| R29                             |                               | Tendency to fall, not elsewhere classified                                                   | 83961 & 83971                                                                              | Dislocation, sternum                                                              |                                                                   |
| R55                             |                               | Syncope and collapse                                                                         | 8484                                                                                       | Sternum sprain                                                                    |                                                                   |
| R54                             |                               | Senility                                                                                     | 813-817                                                                                    | Fracture of radius & ulna, carpal bone(s), metacarpal bone(s), phalanges of hand  |                                                                   |
| M9                              |                               | Fracture of bone following insertion of orthopaedic implant, joint prosthesis, or bone plate | 820-821                                                                                    | Fracture of neck of femur and other parts of femur                                |                                                                   |
|                                 |                               |                                                                                              | E88                                                                                        | Falls                                                                             |                                                                   |

|                                           |          |                                                              |       |                                                                         |
|-------------------------------------------|----------|--------------------------------------------------------------|-------|-------------------------------------------------------------------------|
|                                           |          |                                                              | 7330  | Osteoporosis                                                            |
|                                           |          |                                                              | 7331  | Pathological fracture                                                   |
|                                           |          |                                                              | V1588 | History of fall                                                         |
|                                           |          |                                                              | 7802  | Syncope and collapse                                                    |
|                                           |          |                                                              | 797   | Senility without mention of psychosis                                   |
|                                           |          |                                                              | 9964  | Mechanical complication of internal orthopedic device implant and graft |
| <b>4. Pressure Ulcers and Weight Loss</b> | L89      | Decubitus ulcer and pressure area                            | 7072  | Pressure ulcer                                                          |
|                                           | R63<br>4 | Abnormal weight loss                                         | 7070  | Decubitus ulcer                                                         |
|                                           | R63<br>6 | Insufficient intake of food and water due to self neglect    | 7832  | Abnormal Loss of Weight                                                 |
|                                           | Z72<br>4 | Inappropriate diet and eating habits                         | V691  | Inappropriate diet and eating habits                                    |
| <b>5. Incontinence</b>                    | R32      | Unspecified urinary incontinence                             | 7883  | Incontinence of urine                                                   |
|                                           | R15      | Faecal incontinence                                          | 7876  | Incontinence of feces                                                   |
| <b>6. Dependence and Care</b>             | Z74      | Problems related to care-provider dependency                 | V604  | No other household member able to render care                           |
|                                           | Z75      | Problems related to medical facilities and other health care | V63   | Unavailability of other medical facilities for care                     |
| <b>7. Anxiety and Depression</b>          | F38      | Other mood [affective] disorders                             | 2969  | Other & unspecified affective psychoses                                 |
|                                           | F41      | Other anxiety disorders                                      | 3000  | Anxiety states                                                          |
|                                           | F43      | Reaction to severe stress, and adjustment disorders          | 308   | Acute reaction to stress                                                |
|                                           | F44      | Dissociative [conversion] disorders                          | 309   | Adjustment reaction                                                     |
|                                           | F06<br>4 | Organic anxiety disorder                                     | 3001  | Hysteria                                                                |
|                                           | F32      | Depressive episode                                           | 2962  | Major depressive disorder, single episode                               |
|                                           | F33      | Recurrent depressive disorder                                | 2963  | Major depressive disorder, recurrent episode                            |
|                                           | F20<br>4 | Post-schizophrenic depression                                | 2965  | Bipolar affective disorder, depressed                                   |
|                                           | F25<br>1 | Schizoaffective disorder, depressive type                    | 3004  | Dysthymic disorder                                                      |
|                                           | F31      | Bipolar affective disorder                                   | 3090  | Adjustment disorder with depressed mood                                 |
|                                           | F34<br>1 | Dysthymia                                                    | 3091  | Prolonged depressive reaction                                           |
|                                           | F41<br>2 | Mixed anxiety and depressive disorder                        | 3092  | Adjustment reaction with predominant disturbance of other emotions      |
|                                           | F43<br>2 | Adjustment disorders                                         | 2968  | Manic-depressive psychosis, other & unspecified                         |
|                                           |          |                                                              | 2980  | Depressive type psychosis                                               |
|                                           |          |                                                              | 3011  | Affective personality disorder                                          |
|                                           |          |                                                              | 311   | Depressive disorder, not elsewhere classified                           |

Appendix 2: Odds Ratios for Frailty Score after adjustment for age, gender, country for the outcomes of in-hospital mortality, 30-day non-elective readmission and upper quartile length of stay (for country), by elective and non-elective population groups within the Global Comparators Dataset (Derivation)

In-hospital mortality

Table 12: Odds Ratios of Frailty Score for in-hospital mortality adjusted for age, gender country within each subgroup (elective and non-elective)

Elective

|                          | <b>Odds Ratio</b> | <b>Lower CI</b> | <b>Upper CI</b> | <b>P-value</b> |
|--------------------------|-------------------|-----------------|-----------------|----------------|
| (Intercept)              | 0.001             | 0.000           | 0.001           | <0.001         |
| Age                      | 1.041             | 1.029           | 1.054           | <0.001         |
| Sex - F                  | Reference         |                 |                 |                |
| Sex - M                  | 1.441             | 1.277           | 1.626           | <0.001         |
| Country - Australia      | Reference         |                 |                 |                |
| Country - Belgium        | 1.039             | 0.836           | 1.292           | 0.730          |
| Country - Denmark        | 0.913             | 0.668           | 1.248           | 0.569          |
| Country - Finland        | 0.318             | 0.227           | 0.446           | <0.001         |
| Country - Italy          | 0.702             | 0.496           | 0.994           | 0.046          |
| Country - Netherlands    | 1.413             | 1.107           | 1.803           | 0.005          |
| Country - Norway         | 0.616             | 0.492           | 0.770           | <0.001         |
| Country - United Kingdom | 0.566             | 0.467           | 0.686           | <0.001         |
| Country - United States  | 0.838             | 0.686           | 1.023           | 0.082          |
| Frailty Score            | 1.277             | 1.247           | 1.308           | <0.001         |

Non-elective

|                          | <b>Odds Ratio</b> | <b>Lower CI</b> | <b>Upper CI</b> | <b>P-value</b> |
|--------------------------|-------------------|-----------------|-----------------|----------------|
| (Intercept)              | 0.002             | 0.002           | 0.003           | <0.001         |
| Age                      | 1.040             | 1.037           | 1.043           | <0.001         |
| Sex - F                  | Reference         |                 |                 |                |
| Sex - M                  | 1.305             | 1.265           | 1.346           | <0.001         |
| Country - Australia      | Reference         |                 |                 |                |
| Country - Belgium        | 1.338             | 1.213           | 1.478           | <0.001         |
| Country - Denmark        | 1.480             | 1.371           | 1.598           | <0.001         |
| Country - Finland        | 0.936             | 0.864           | 1.015           | 0.109          |
| Country - Italy          | 1.682             | 1.462           | 1.936           | <0.001         |
| Country - Netherlands    | 1.525             | 1.361           | 1.709           | <0.001         |
| Country - Norway         | 1.001             | 0.942           | 1.062           | 0.987          |
| Country - United Kingdom | 1.492             | 1.419           | 1.570           | <0.001         |
| Country - United States  | 0.897             | 0.844           | 0.953           | <0.001         |
| Frailty Score            | 1.109             | 1.103           | 1.116           | <0.001         |

### 30-day non-elective readmission

Table 13: Odds Ratios of Frailty Score for 30-day non-elective readmission adjusted for age, gender country within each subgroup (elective and non-elective)

#### Elective

|                          | <b>Odds Ratio</b> | <b>Lower CI</b> | <b>Upper CI</b> | <b>P-value</b> |
|--------------------------|-------------------|-----------------|-----------------|----------------|
| (Intercept)              | 0.037             | 0.021           | 0.065           | <0.001         |
| Age                      | 1.002             | 0.995           | 1.009           | 0.622          |
| Sex - F                  | Reference         |                 |                 |                |
| Sex - M                  | 1.159             | 1.087           | 1.236           | <0.001         |
| Country - Australia      | Reference         |                 |                 |                |
| Country - Belgium        | 0.893             | 0.758           | 1.053           | 0.179          |
| Country - Denmark        | 1.573             | 1.339           | 1.847           | <0.001         |
| Country - Finland        | 1.153             | 1.003           | 1.326           | 0.045          |
| Country - Italy          | 0.500             | 0.391           | 0.640           | <0.001         |
| Country - Netherlands    | 1.174             | 0.988           | 1.395           | 0.068          |
| Country - Norway         | 1.616             | 1.434           | 1.821           | <0.001         |
| Country - United Kingdom | 1.094             | 0.975           | 1.228           | 0.125          |
| Country - United States  | 1.323             | 1.168           | 1.498           | <0.001         |
| Admission History        | 1.453             | 1.411           | 1.495           | <0.001         |
| Frailty Score            | 1.106             | 1.060           | 1.154           | <0.001         |

#### Non-elective

|                          | <b>Odds Ratio</b> | <b>Lower CI</b> | <b>Upper CI</b> | <b>P-value</b> |
|--------------------------|-------------------|-----------------|-----------------|----------------|
| (Intercept)              | 0.112             | 0.091           | 0.136           | <0.001         |
| Age                      | 0.998             | 0.996           | 1.001           | 0.201          |
| Sex - F                  | Reference         |                 |                 |                |
| Sex - M                  | 1.167             | 1.137           | 1.198           | <0.001         |
| Country - Australia      | Reference         |                 |                 |                |
| Country - Belgium        | 0.803             | 0.722           | 0.893           | <0.001         |
| Country - Denmark        | 1.317             | 1.231           | 1.408           | <0.001         |
| Country - Finland        | 0.995             | 0.931           | 1.063           | 0.879          |
| Country - Italy          | 0.760             | 0.646           | 0.893           | 0.001          |
| Country - Netherlands    | 0.774             | 0.683           | 0.877           | <0.001         |
| Country - Norway         | 1.582             | 1.507           | 1.660           | <0.001         |
| Country - United Kingdom | 1.362             | 1.302           | 1.425           | <0.001         |
| Country - United States  | 1.274             | 1.211           | 1.340           | <0.001         |
| Admission History        | 1.315             | 1.303           | 1.326           | <0.001         |
| Frailty Score            | 1.056             | 1.031           | 1.082           | <0.001         |

Upper Quartile Length of Stay (for country)

Table 14: Odds Ratios of Frailty Score for Upper Quartile Length of Stay (for country) adjusted for age, gender country within each subgroup (elective and non-elective)

Elective

|                          | <b>Odds Ratio</b> | <b>Lower CI</b> | <b>Upper CI</b> | <b>P-value</b> |
|--------------------------|-------------------|-----------------|-----------------|----------------|
| (Intercept)              | 0.065             | 0.045           | 0.094           | <0.001         |
| Age                      | 1.016             | 1.011           | 1.020           | <0.001         |
| Sex - F                  | Reference         |                 |                 |                |
| Sex - M                  | 0.966             | 0.927           | 1.008           | 0.112          |
| Country - Australia      | Reference         |                 |                 |                |
| Country - Belgium        | 0.415             | 0.376           | 0.457           | <0.001         |
| Country - Denmark        | 0.616             | 0.549           | 0.691           | <0.001         |
| Country - Finland        | 0.511             | 0.467           | 0.558           | <0.001         |
| Country - Italy          | 1.053             | 0.953           | 1.162           | 0.310          |
| Country - Netherlands    | 0.763             | 0.691           | 0.843           | <0.001         |
| Country - Norway         | 0.767             | 0.713           | 0.825           | <0.001         |
| Country - United Kingdom | 0.294             | 0.273           | 0.316           | <0.001         |
| Country - United States  | 0.819             | 0.765           | 0.878           | <0.001         |
| Frailty Score            | 1.365             | 1.347           | 1.382           | <0.001         |

Non-elective

|                          | <b>Odds Ratio</b> | <b>Lower CI</b> | <b>Upper CI</b> | <b>P-value</b> |
|--------------------------|-------------------|-----------------|-----------------|----------------|
| (Intercept)              | 0.284             | 0.245           | 0.330           | <0.001         |
| Age                      | 0.995             | 0.993           | 0.996           | <0.001         |
| Sex - F                  | Reference         |                 |                 | <0.001         |
| Sex - M                  | 1.055             | 1.034           | 1.076           | <0.001         |
| Country - Australia      | Reference         |                 |                 | <0.001         |
| Country - Belgium        | 1.766             | 1.658           | 1.881           | <0.001         |
| Country - Denmark        | 1.570             | 1.492           | 1.652           | <0.001         |
| Country - Finland        | 1.705             | 1.628           | 1.786           | <0.001         |
| Country - Italy          | 2.270             | 2.074           | 2.484           | <0.001         |
| Country - Netherlands    | 2.268             | 2.112           | 2.435           | <0.001         |
| Country - Norway         | 1.303             | 1.254           | 1.353           | <0.001         |
| Country - United Kingdom | 1.508             | 1.459           | 1.559           | <0.001         |
| Country - United States  | 1.434             | 1.382           | 1.488           | <0.001         |
| Frailty Score            | 1.199             | 1.194           | 1.205           | <0.001         |

Appendix 3: Odds Ratios for Frailty Score after adjustment for age, gender, calendar year for the outcomes of in-hospital mortality, 30-day non-elective readmission and upper quartile length of stay (for country), by elective and non-elective population groups in Hospital Episode Statistics dataset (Validation)

In-hospital mortality

Table 15: Odds Ratios of Frailty Score for in-hospital mortality adjusted for age, gender and calendar year within each subgroup (elective and non-elective)

Elective

|                      | <b>Odds Ratio</b> | <b>Lower CI</b> | <b>Upper CI</b> | <b>Z-value</b> | <b>P-value</b> |
|----------------------|-------------------|-----------------|-----------------|----------------|----------------|
| (Intercept)          | 0.001             | 0.001           | 0.001           | -338.153       | 0.000          |
| Age                  | 1.051             | 1.050           | 1.051           | 206.705        | 0.000          |
| Sex - F              | Reference         |                 |                 |                |                |
| Sex - M              | 1.274             | 1.267           | 1.281           | 84.839         | 0.000          |
| Calendar Year - 2012 | Reference         |                 |                 |                |                |
| Calendar Year - 2013 | 0.938             | 0.931           | 0.945           | -16.172        | 0.000          |
| Calendar Year - 2014 | 0.851             | 0.844           | 0.857           | -40.603        | 0.000          |
| Calendar Year - 2015 | 0.865             | 0.858           | 0.871           | -36.727        | 0.000          |
| <b>Frailty Score</b> | <b>1.173</b>      | <b>1.171</b>    | <b>1.174</b>    | <b>279.196</b> | <b>0.000</b>   |

Non-elective

|                      | <b>Odds Ratio</b> | <b>Lower CI</b> | <b>Upper CI</b> | <b>Z-value</b> | <b>P-value</b> |
|----------------------|-------------------|-----------------|-----------------|----------------|----------------|
| (Intercept)          | 0.001             | 0.001           | 0.001           | -353.600       | 0.000          |
| Age                  | 1.055             | 1.055           | 1.056           | 227.822        | 0.000          |
| Sex - F              | Reference         |                 |                 |                |                |
| Sex - M              | 1.233             | 1.226           | 1.240           | 73.302         | 0.000          |
| Calendar Year - 2012 | Reference         |                 |                 |                |                |
| Calendar Year - 2013 | 0.936             | 0.929           | 0.944           | -16.598        | 0.000          |
| Calendar Year - 2014 | 0.850             | 0.844           | 0.857           | -40.640        | 0.000          |
| Calendar Year - 2015 | 0.869             | 0.862           | 0.876           | -35.371        | 0.000          |
| <b>Frailty Score</b> | <b>1.108</b>      | <b>1.107</b>    | <b>1.109</b>    | <b>315.847</b> | <b>0.000</b>   |

### 30-day non-elective readmission

Table 16: Odds Ratios of Frailty Score for 30-day non-elective readmission adjusted for age, gender and calendar year within each subgroup (elective and non-elective)

#### Elective

|                               | <b>Odds Ratio</b> | <b>Lower CI</b> | <b>Upper CI</b> | <b>Z-value</b> | <b>P-value</b> |
|-------------------------------|-------------------|-----------------|-----------------|----------------|----------------|
| (Intercept)                   | 0.055             | 0.054           | 0.057           | -186.458       | 0.000          |
| Age                           | 1.011             | 1.010           | 1.011           | 58.247         | 0.000          |
| Sex - F                       | Reference         |                 |                 |                |                |
| Sex - M                       | 1.119             | 1.114           | 1.123           | 53.787         | 0.000          |
| Calendar Year - 2012          | Reference         |                 |                 |                |                |
| Calendar Year - 2013          | 0.994             | 0.989           | 1               | -1.918         | 0.055          |
| Calendar Year – 2014          | 1.015             | 1.009           | 1.021           | 5.090          | 0.000          |
| Calendar Year – 2015          | 1.018             | 1.012           | 1.024           | 6.228          | 0.000          |
| Previous Emergency Admissions | 1.443             | 1.440           | 1.445           | 379.358        | 0.000          |
| <b>Frailty Score</b>          | <b>1.045</b>      | <b>1.044</b>    | <b>1.047</b>    | <b>77.860</b>  | <b>0.000</b>   |

#### Non-elective

|                               | <b>Odds Ratio</b> | <b>Lower CI</b> | <b>Upper CI</b> | <b>Z-value</b> | <b>P-value</b> |
|-------------------------------|-------------------|-----------------|-----------------|----------------|----------------|
| (Intercept)                   | 0.053             | 0.051           | 0.054           | -191.317       | 0.000          |
| Age                           | 1.011             | 1.011           | 1.012           | 62.570         | 0.000          |
| Sex - F                       | Reference         |                 |                 |                |                |
| Sex - M                       | 1.121             | 1.117           | 1.126           | 54.752         | 0.000          |
| Calendar Year - 2012          | Reference         |                 |                 |                |                |
| Calendar Year - 2013          | 0.993             | 0.987           | 0.998           | -2.526         | 0.012          |
| Calendar Year – 2014          | 1.012             | 1.007           | 1.018           | 4.231          | 0.000          |
| Calendar Year – 2015          | 1.015             | 1.010           | 1.021           | 5.218          | 0.000          |
| Previous Emergency Admissions | 1.439             | 1.436           | 1.442           | 376.406        | 0.000          |
| <b>Frailty Score</b>          | <b>1.030</b>      | <b>1.030</b>    | <b>1.031</b>    | <b>85.172</b>  | <b>0.000</b>   |

Upper quartile length of stay

Table 17: Odds Ratios of Frailty Score for upper quartile length of stay adjusted for age, gender and calendar year within each subgroup (elective and non-elective)

Elective

|                      | <b>Odds Ratio</b> | <b>Lower CI</b> | <b>Upper CI</b> | <b>Z-value</b> | <b>P-value</b> |
|----------------------|-------------------|-----------------|-----------------|----------------|----------------|
| (Intercept)          | 0.030             | 0.029           | 0.031           | -258.331       | 0.000          |
| Age                  | 1.023             | 1.023           | 1.024           | 143.925        | 0.000          |
| Sex - F              | Reference         |                 |                 |                |                |
| Sex - M              | 0.940             | 0.937           | 0.944           | -32.930        | 0.000          |
| Calendar Year - 2012 | Reference         |                 |                 |                |                |
| Calendar Year - 2013 | 0.975             | 0.970           | 0.980           | -9.874         | 0.000          |
| Calendar Year - 2014 | 0.891             | 0.886           | 0.895           | -44.736        | 0.000          |
| Calendar Year - 2015 | 0.872             | 0.868           | 0.877           | -52.705        | 0.000          |
| <b>Frailty Score</b> | <b>1.193</b>      | <b>1.192</b>    | <b>1.193</b>    | <b>593.715</b> | <b>0.000</b>   |

Non-elective

|                      | <b>Odds Ratio</b> | <b>Lower CI</b> | <b>Upper CI</b> | <b>Z-value</b> | <b>P-value</b> |
|----------------------|-------------------|-----------------|-----------------|----------------|----------------|
| (Intercept)          | 0.031             | 0.030           | 0.032           | -255.862       | 0.000          |
| Age                  | 1.023             | 1.022           | 1.023           | 139.087        | 0.000          |
| Sex - F              | Reference         |                 |                 |                |                |
| Sex - M              | 0.948             | 0.944           | 0.951           | -28.576        | 0.000          |
| Calendar Year - 2012 | Reference         |                 |                 |                |                |
| Calendar Year - 2013 | 0.979             | 0.974           | 0.984           | -8.288         | 0.000          |
| Calendar Year - 2014 | 0.896             | 0.891           | 0.900           | -42.538        | 0.000          |
| Calendar Year - 2015 | 0.878             | 0.874           | 0.883           | -50.020        | 0.000          |
| <b>Frailty Score</b> | <b>1.055</b>      | <b>1.055</b>    | <b>1.055</b>    | <b>602.049</b> | <b>0.000</b>   |



Appendix 4 Case-mix adjustment for older persons utilising administrative data

| Author              | Year | Country        | Study population                                                                       | N      | Data Source                                                                                         | Outcome                           | Predictors                                                                                                                                    | Model performance                                                |
|---------------------|------|----------------|----------------------------------------------------------------------------------------|--------|-----------------------------------------------------------------------------------------------------|-----------------------------------|-----------------------------------------------------------------------------------------------------------------------------------------------|------------------------------------------------------------------|
| Von Korff et al.(1) | 1991 | United States  | Population based pharmacy data                                                         | 122911 | Administrative                                                                                      | Mortality and hospitalisation     | Consensus based Chronic Disease Score(CDS)                                                                                                    |                                                                  |
| Rosen et al.(2)     | 2001 | United States  | Long-term facility resident (Veterans Affairs)                                         | 39839  | Administrative (Patient Assessment File(PAF), Patient Treatment File(PTF), Extended Care File(ECF)) | Decline in functional status      | International Classification of Diseases, Ninth Revision Clinical Modification (ICD-9) , demographics, treatments, activities of daily living | AUC for decline in functional status is 0.70                     |
| Desai et al.(3)     | 2002 | United States  | ≥70 admitted to geriatric service                                                      | 1376   | Administrative (Management Information System)                                                      | Mortality                         | International Classification of Diseases system version 9 (ICD-9)                                                                             | AUC 0.76 for mortality in derivation and AUV 0.68 in validation) |
| Kautter et al(4)    | 2004 | United States  | Medicare                                                                               | 17597  | Administrative The Medicare Current Beneficiary Survey (MCBS)                                       | Cost                              | ADLs, Long-term institution status, Age                                                                                                       |                                                                  |
| Roland et al.(5)    | 2005 | United Kingdom | Individual patients aged ≥ 65, ≥ 75, and ≥ 85who had at least two emergency admissions | 227206 | Administrative (Hospital Episode Statistics)                                                        | Non-elective hospital readmission | Individual patients aged ≥ 65who had at least two emergency admissions                                                                        |                                                                  |

|                         |      |                |                                                                    |        |                                                                           |                                                                                                                                          |                                                                                                                                                                                                                                          |                                                                                   |
|-------------------------|------|----------------|--------------------------------------------------------------------|--------|---------------------------------------------------------------------------|------------------------------------------------------------------------------------------------------------------------------------------|------------------------------------------------------------------------------------------------------------------------------------------------------------------------------------------------------------------------------------------|-----------------------------------------------------------------------------------|
| Inoye et al.(6)         | 2008 | United States  | Primary care clinic                                                | 3919   | Administrative                                                            | Non-elective hospital admission                                                                                                          | Deyo-Charlson, comorbidity score $\geq 2$ , any prior hospitalization 6 or more primary care visits, $\geq 85$ years unmarried status                                                                                                    | AUC 0.73                                                                          |
| Sternberg et al.(7)     | 2012 | Israel         | Patients receiving Comprehensive Geriatric Assessment via OPD      | 221    | Administrative; and survey                                                | Resource utilisation (number of physician visits in 3 months, number of ED visits in a year, and number of hospitalizations in the year) | VES Frailty Score(13-item function-based self-report questionnaire The Adjusted Clinical Groups–diagnoses based predictive model (ACG Dx-PM) based on age, sex, diagnostic codes, and pharmacy data                                      | ACG predict frailty defined by VES – AUC 0.63                                     |
| Davidoff et al.(8)      | 2013 | United States  | US Medicare beneficiaries aged $\geq 65$ years                     | 14788  | Administrative (Medicare) and Medicare Current Beneficiary Survey (MCBS), | Disability Status                                                                                                                        | Healthcare services, Berenson-Eggers Type of Service (BETOS) codes- American Medical Association's Current Procedural Terminology (CPT) codes, or the CMS, Healthcare Common Procedure Coding System (HCPCS level II) codes, demographic | AUC 0.92 for disability status                                                    |
| Bottle et al.(9)        | 2014 | United Kingdom | Admitted with heart failure                                        | 84212  | Administrative (Hospital Episode statistics)                              | Non-elective hospital readmission                                                                                                        | AHRQ's (Agency for Healthcare Research and Quality) Clinical Classification System International Classification of Diseases system version 10 (ICD-10)                                                                                   |                                                                                   |
| Chrischilles et al.(10) | 2014 | United States  | US Medicare beneficiaries aged $\geq 65$ years admitted with acute | 144112 | Administrative                                                            | Mortality, cardiac catheterisation                                                                                                       | Demographic measures, cardiovascular conditions, comorbidities, previous hospitalization, and Function related indicators(FRI)                                                                                                           | AUC Mortality 0.74, AUC cardiac catheterisation 0.79, Including the FRIs improved |

|                   |      |                |                                                       |           |                                                               |                                                                  |                                                                                                                                                                                                                                                                                             |                                                                                                          |
|-------------------|------|----------------|-------------------------------------------------------|-----------|---------------------------------------------------------------|------------------------------------------------------------------|---------------------------------------------------------------------------------------------------------------------------------------------------------------------------------------------------------------------------------------------------------------------------------------------|----------------------------------------------------------------------------------------------------------|
|                   |      |                | myocardial infarction                                 |           |                                                               |                                                                  |                                                                                                                                                                                                                                                                                             | prediction models                                                                                        |
| Ruiz et al.(11)   | 2015 | United Kingdom | Individual patients aged ≥ 65 with hospital admission | 2788900   | Administrative (Hospital Episode Statistics)                  | Mortality, Non-elective hospital readmission, Hospital admission | ≥ 65 years old, who have at least 3 simultaneous diagnoses of major clinical conditions.                                                                                                                                                                                                    |                                                                                                          |
| Faurot et al.(12) | 2015 | United States  | ≥ 65 community dwelling                               | 6391      | Administrative and Medicare Current Beneficiary Survey (MCBS) | Functional decline                                               | demographics, International Classification of Diseases, Ninth Revision Clinical Modification (ICD-9) diagnosis/procedure and durable medical equipment codes for frailty-associated conditions, (Current Procedural Terminology (CPT) and Healthcare Common Procedure Coding System (HCPC)) |                                                                                                          |
| Hope et al.(13)   | 2015 | United States  | >70 admitted to ICU                                   | 47427     | Administrative (Medicare)                                     | Mortality                                                        | International Classification of Diseases, Ninth Revision Clinical Modification (ICD-9) diagnosis & claims for skilled nursing facility: creation of four categories: 1)Cancer 2)Chronic Organ Failure3)Frailty4) Robust                                                                     |                                                                                                          |
| Soong et al.      | 2015 | United Kingdom | >65 non-elective admission to hospital                | 2 099 252 | Administrative                                                | Mortality, non-elective readmission, functional decline          | ICD-10 coded Frailty Syndromes                                                                                                                                                                                                                                                              | AUC of 0.624–0.659 for inpatient mortality, 0.63–0.654 for institutionalisation and 0.57–0.63 for 30-day |

|                    |      |                |                                                            |           |                                                                                                                 |                                                                 |                                                                                                                                                                                                              |                                                                                          |
|--------------------|------|----------------|------------------------------------------------------------|-----------|-----------------------------------------------------------------------------------------------------------------|-----------------------------------------------------------------|--------------------------------------------------------------------------------------------------------------------------------------------------------------------------------------------------------------|------------------------------------------------------------------------------------------|
|                    |      |                |                                                            |           |                                                                                                                 |                                                                 |                                                                                                                                                                                                              | emergency readmission.                                                                   |
| Briggs et al.(14)  | 2016 | Ireland        | Patients admitted with dementia to single hospital         | 929       | Administrative                                                                                                  | Cost                                                            | International Classification of Diseases system version 10 (ICD-10)                                                                                                                                          |                                                                                          |
| Mclsaac et al.(15) | 2016 | Canada         | >65 years Elective non-cardiac surgery                     | 202811    | Administrative Discharge Abstract Database, Ontario Health Insurance Plan Database, Registered Persons Database | Inpatient mortality                                             | John's Hopkins Adjusted Clinical Groups (ACG, Johns Hopkins University) frailty-defining diagnoses indicator,                                                                                                |                                                                                          |
| Kim et al.(16)     | 2017 | United States  | ≥ 65 community dwelling                                    | 10017     | Administrative (Medicare) and Medicare Current Beneficiary Survey (MCBS)                                        | Mortality, disability, mobility impairment, and recurrent falls | International Classification of Diseases, Ninth Revision Clinical Modification (ICD-9) (Current Procedural Terminology (CPT) and Healthcare Common Procedure Coding System (HCPC)) to create a frailty index |                                                                                          |
| Gilbert et al.(17) | 2018 | United Kingdom | >75 years elective and non-elective admissions to hospital | 1 013 590 | Administrative Hospital Episode Statistics                                                                      | Mortality, long length of stay, non-elective readmission        | ICD-10 Codes identified by cluster analysis for Bed days, Hospital costs, and ICD-10 coded Frailty Syndromes                                                                                                 | AUC 0-60 for 30-day mortality, 0-68 for long hospital stay, 0-56 for 30-day readmission. |

## References

1. Von Korff M, Wagner EH, Saunders K. A chronic disease score from automated pharmacy data. *Journal of Clinical Epidemiology*. 45(2):197-203.
2. Amy R, Jeanne W, Bei-Hung C, Dan B, Carter R, Arlene A, et al. Risk Adjustment for Measuring Health Outcomes: An Application in VA Long term Care. *American Journal of Medical Quality*. 2001;16(4):118-27.
3. Desai Mayur M, Bogardus Sidney T, Williams Christianna S, Vitagliano G, Inouye Sharon K. Development and Validation of a Risk-Adjustment Index for Older Patients: The High-Risk Diagnoses for the Elderly Scale. *Journal of the American Geriatrics Society*. 2002;50(3):474-81.
4. Kautter J, Pope GC. CMS Frailty Adjustment Model. *Health Care Financing Review*. 2004;26(2):1-19.
5. Roland M, Dusheiko M, Gravelle H, Parker S. Follow up of people aged 65 and over with a history of emergency admissions: analysis of routine admission data. *BMJ*. 2005;330(7486):289-92.
6. Inouye S, Md MPH, Zhang Y, Jones R, Shi P, Cupples L, et al. Risk Factors for Hospitalization Among Community-Dwelling Primary Care Older Patients: Development and Validation of a Predictive Model. *Med Care*. 2008;46(7):726-31.
7. Sternberg SA, Wershof Schwartz A, Karunanathan S, Bergman H, Mark Clarfield A. The identification of frailty: a systematic literature review. *J Am Geriatr Soc*. 2011;59(11):2129-38.
8. Davidoff AJ, Hurria A, Zuckerman IH, Lichtman SM, Pandya N, Hussain A, et al. A Novel Approach to Improve Health Status Measurement in Observational Claims-based Studies of Cancer Treatment and Outcomes. *Journal of geriatric oncology*. 2013;4(2):157-65.
9. Bottle A, Aylin P, Bell D. Effect of the readmission primary diagnosis and time interval in heart failure patients: analysis of English administrative data. *European Journal of Heart Failure*. 2014;16(8):846-53.
10. Chrischilles E, Schneider K, Wilwert J, Lessman G, O'Donnell B, Gryzlak B, et al. Beyond Comorbidity: Expanding the Definition and Measurement of Complexity Among Older Adults Using Administrative Claims Data. *Medical Care*. 2014;52:S75-S84.
11. Ruiz M, Bottle A, Long S, Aylin P. Multi-Morbidity in Hospitalised Older Patients: Who Are the Complex Elderly? . *PLoS ONE*. 2015;10(12).
12. Faurot KR, Funk MJ, Pate V, Brookhart MA, Patrick A, Hanson LC, et al. Using Claims Data to Predict Dependency in Activities of Daily Living as a Proxy for Frailty. *Pharmacoepidemiology and drug safety*. 2015;24(1):59-66.
13. Hope Aluko A, Gong Michelle N, Guerra C, Wunsch H. Frailty Before Critical Illness and Mortality for Elderly Medicare Beneficiaries. *Journal of the American Geriatrics Society*. 2015;63(6):1121-8.
14. Briggs R, Coary R, Collins R, Coughlan T, O'Neill D, Kennelly SP. Acute hospital care: how much activity is attributable to caring for patients with dementia? *QJM*. 2016;109(1):41-4.
15. McIsaac DI, Bryson GL, van Walraven C. Association of frailty and 1-year postoperative mortality following major elective noncardiac surgery: A population-based cohort study. *JAMA Surgery*. 2016;151(6):538-45.
16. Kim DH, Schneeweiss S, Glynn RJ, Lipsitz LA, Rockwood K, Avorn J. Measuring Frailty in Medicare Data: Development and Validation of a Claims-Based Frailty Index. *The Journals of Gerontology: Series A*. 2017;glx229-glx.
17. Gilbert T, Neuburger J, Kraindler J, Keeble E, Smith P, Ariti C, et al. Development and validation of a Hospital Frailty Risk Score focusing on older people in acute care settings using electronic hospital records: an observational study. *The Lancet*. 2018;391(10132):1775-82.
